# Supplementary material for: Nuclear CK1δ as a critical determinant of PER:CRY complex dynamics and circadian period
Source: eLife. 2026 Jun 15;15:RP110786. doi: 10.7554/eLife.110786 (PMC13268647; doi:10.7554/eLife.110786)
Supplement: Figure 3—source data 3. [file elife-110786-fig3-data3.xlsx]

## Sheet: NormCK1dmRNA
U2OStx	CK1	CK1-K38R	CK1-R178Q
0.958158	42.2095	62.9372	37.7236
1.01346	49.1704	46.8364	33.8021
1.02838	39.1007	58.1752	41.3603

## Sheet: ANOVA_qPCR
Number of families	1
Number of comparisons per family	6
Alpha	0.05
Tukey's multiple comparisons test	Mean diff,	95,00% CI of diff,	Below threshold?	Summary	Adjusted P Value
U2OStx vs. CK1	-42.49	-56,16 to -28,83	Yes	****	<0,0001	A-B
U2OStx vs. CK1-K38R	-54.98	-68,65 to -41,32	Yes	****	<0,0001	A-C
U2OStx vs. CK1-R178Q	-36.63	-50,30 to -22,96	Yes	***	0.0001	A-D
CK1 vs. CK1-K38R	-12.49	-26,16 to 1,178	No	ns	0.0738	B-C
CK1 vs. CK1-R178Q	5.865	-7,802 to 19,53	No	ns	0.5469	B-D
CK1-K38R vs. CK1-R178Q	18.35	4,687 to 32,02	Yes	*	0.0112	C-D
Test details	Mean 1	Mean 2	Mean diff,	SE of diff,	n1	n2	q	DF
U2OStx vs. CK1	1	43.49	-42.49	4.268	3	3	14.08	8
U2OStx vs. CK1-K38R	1	55.98	-54.98	4.268	3	3	18.22	8
U2OStx vs. CK1-R178Q	1	37.63	-36.63	4.268	3	3	12.14	8
CK1 vs. CK1-K38R	43.49	55.98	-12.49	4.268	3	3	4.139	8
CK1 vs. CK1-R178Q	43.49	37.63	5.865	4.268	3	3	1.943	8
CK1-K38R vs. CK1-R178Q	55.98	37.63	18.35	4.268	3	3	6.082	8
Compact letter display
CK1-K38R	A
CK1	A B
CK1-R178Q	B
U2OStx	C
