# Supplementary material for: Nuclear CK1δ as a critical determinant of PER:CRY complex dynamics and circadian period
Source: eLife. 2026 Jun 15;15:RP110786. doi: 10.7554/eLife.110786 (PMC13268647; doi:10.7554/eLife.110786)
Supplement: Figure 3—source data 4. [file elife-110786-fig3-data4.xlsx]

## Sheet: NormQuantCK1Deg
CHX [min]	endo CSNK1D_1	endo CSNK1D_2	endo CSNK1D_3	oe CSNK1D_1	oe CSNK1D_2	oe CSNK1D_3	K38R_1	K38R_2	K38R_3	R178Q_1	R178Q_2	R178Q_3
15	1,89907*	1,067601*	2,067066*	0.261064	0.179434	0.334104	0.956919	1.0286	0.629166	0.414971	0.772403	0.683653
30	0.674678	0.995356	1,89956*	0.077629	0.218851	0.210314	0.919864	0.795308	0.969277	0.455052	0.766313	0.643812
60	0.380111	1.0241	0.821226	0.001395	0.15561	0.083429	0.776974	0.736847	0.772719	0.499661	0.490578	0.787654
90	0.694012	0.925686	1.11866	0.006867	0.05302	0.085568	0.814911	0.594153	0.796925	0.976688	0.585322	0.908805
*values excluded due to uneven loading
