# Supplementary material for: Nuclear CK1δ as a critical determinant of PER:CRY complex dynamics and circadian period
Source: eLife. 2026 Jun 15;15:RP110786. doi: 10.7554/eLife.110786 (PMC13268647; doi:10.7554/eLife.110786)
Supplement: Figure 5—figure supplement 1—source data 1. [file elife-110786-fig5-figsupp1-data1.xlsx]

## Sheet: endoCK1_MG132
Cell	endoCK1-DMSO	endoCK1-MG132
1	194827	289266
2	269307	307174
3	161297	155367
4	312182	176099
5	197121	220892
6	307617	221209
7	554811	346229
8	290621	143942
9	438645	496920
10	299556	454541
11	155296	517296
12	798069	235122
13	192972	330039
14	112191	310316
15	309306	280082
16	394914	332728
17	316663	358540
18	516784	154702
19	156498	1112907
20	230630	277473
21	145509	129882
22	293690	401201
23	208704	624715
24	476092	783745
25	362507	408401
26	926324	158843
27	209357	416417
28	186491	265378
29	274690	231092
30	210339	381116
31	264545	489886
32	256318	285220
33	243940	408942
34	924153	568021
35	269423	540311
36	328432	550808
37	366319	321130
38	492595	366866
39	546316	368504
40	191687	293165
41	170337	450162
42	281034	578868
43	181095	489346
44	240487	220925
45	297172	269613
46	216596	163965
47	245623	234236
48	262574	151527
49	398667	615553
50	347425	342119
51	349966	287385
52	357413	437383
53	381233	167518
54	469891	523958
55	356339	471573
56	413926	505663
57		578416
58		247490
59		290769
60		384779
61		321194
62		284358
63		298152

## Sheet: Unpaired t test
Table Analyzed	IntegInt
Group D	endoCK1-MG132
vs.	vs,
Group C	endoCK1-DMSO
Mann Whitney test
P value	0.0984
Exact or approximate P value?	Exact
P value summary	ns
Significantly different (P < 0.05)?	No
One- or two-tailed P value?	Two-tailed
Sum of ranks in group C,D	3049 , 4091
Mann-Whitney U	1453
Difference between medians
Median of group C	292156, n=56
Median of group D	330039, n=63
Difference: Actual	37884
Difference: Hodges-Lehmann	40357
