# Supplementary material for: Nuclear CK1δ as a critical determinant of PER:CRY complex dynamics and circadian period
Source: eLife. 2026 Jun 15;15:RP110786. doi: 10.7554/eLife.110786 (PMC13268647; doi:10.7554/eLife.110786)
Supplement: Figure 5—figure supplement 1—source data 2. [file elife-110786-fig5-figsupp1-data2.xlsx]

## Sheet: endoCK1-PF670
Cell	endoCK1-H2O	endoCK1-PF670
1	296310	266103
2	100015	229938
3	251024	229800
4	204805	381938
5	221269	430430
6	252594	660947
7	257552	497602
8	187242	270848
9	284549	568348
10	161432	574118
11	141730	383521
12	353479	159388
13	339988	458725
14	234475	316516
15	272390	412258
16	160017	164082
17	302818	596217
18	543907	323223
19	278121	170549
20	180879	374129
21	238651	151006
22	164161	300853
23	93617	245651
24	286293	81565
25	184965	444110
26	197161	268266
27	159524	328405
28	92153	148227
29	255969	609872
30	140313	465777
31	130224	91184
32	831509	458580
33	292122	438937
34	1410225	580390
35	87432	197646
36	158404	290048
37	153463	289130
38	159239	360782
39	206094	96263
40	182381	142507
41	229159	250785
42	300686	214303
43	133323	638322
44	325077	143930
45	142639	174144
46	254397	225153
47	510791	228199
48	122328	236821
49	174899	328935
50	383177	230030
51	361450	225625
52	472719	231783
53	181588	247175
54	202991	204637
55	456538	363032
56	219931	124978
57	165714	384409
58	293448	270980
59		234475
60		365670
61		242907
62		190548
63		389227
64		253423
65		252687
66		458527
67		211826
68		303982
69		411769
70		253354
71		379581
72		203182
73		319613
74		243900
75		484031
76		351653
77		458942
78		235356
79		268022
80		175562

## Sheet: Unpaired t-test
Table Analyzed	boxplotIntegInt_nolabel_split_endoCK1
Group D	endoCK1-PF670
vs.	vs,
Group C	endoCK1-H2O
Unpaired t test
P value	0.1118
P value summary	ns
Significantly different (P < 0.05)?	No
One- or two-tailed P value?	Two-tailed
t, df	t=1,600, df=136
How large is the effect?
Mean of group C	265161
Mean of group D	310867
Difference between means (D - C) ± SEM	45706 ± 28560
95% confidence interval	-10773 to 102185
R squared (eta squared)	0.01848
F test to compare variances
F, DFn, Dfd	2,153, 57, 79
P value	0.0016
P value summary	**
Significantly different (P < 0.05)?	Yes
Data analyzed
Sample size, group C	58
Sample size, group D	80
