# Supplementary material for: Nuclear CK1δ as a critical determinant of PER:CRY complex dynamics and circadian period
Source: eLife. 2026 Jun 15;15:RP110786. doi: 10.7554/eLife.110786 (PMC13268647; doi:10.7554/eLife.110786)
Supplement: Figure 5—source data 1. [file elife-110786-fig5-data1.xlsx]

## Sheet: oxCK1_MG132
Cell	CK1-DMSO	CK1-MG132
1	230560	710677
2	155847	375650
3	538128	353004
4	203456	471117
5	151719	433906
6	277589	490384
7	159973	1636117
8	174486	2220052
9	133038	2229508
10	279381	1481565
11	278323	913900
12	964937	245800
13	171847	667243
14	256526	223165
15	407272	411303
16	533416	500045
17	216399	271926
18	130959	892001
19	122990	160158
20	461217	385410
21	320818	543063
22	142748	191524
23	253093	525196
24	259566	1166950
25	194234	1279200
26	145567	284603
27	161398	1138095
28	228195	518503
29	782556	237719
30	525768	811806
31	135966	291049
32	135632	171219
33	129914	435480
34	161477	1186706
35	458349	834629
36	127979	345594
37	292437	593767
38	275566	2778782
39	110601	1207964
40	231375	825483
41	139842	869744
42	177930	1464779
43	423711	222822
44	150097	431081
45	122763	628482
46	421900	150138
47	211977	799519
48	466107	226962
49	192698	2163077
50	97731	864089
51	204061	1450966
52		395181
53		676133
54		1374999

## Sheet: Unpaired t test
Table Analyzed	IntegInt
Group B	CK1-MG132
vs.	vs,
Group A	CK1-DMSO
Mann Whitney test
P value	<0,0001
Exact or approximate P value?	Exact
P value summary	***
Significantly different (P < 0.05)?	Yes
One- or two-tailed P value?	Two-tailed
Sum of ranks in group A,B	1744 , 3821
Mann-Whitney U	418
Difference between medians
Median of group A	204061, n=51
Median of group B	568415, n=54
Difference: Actual	364354
Difference: Hodges-Lehmann	340115
