# Supplementary material for: Nuclear CK1δ as a critical determinant of PER:CRY complex dynamics and circadian period
Source: eLife. 2026 Jun 15;15:RP110786. doi: 10.7554/eLife.110786 (PMC13268647; doi:10.7554/eLife.110786)
Supplement: Figure 5—source data 2. [file elife-110786-fig5-data2.xlsx]

## Sheet: oxCK1-PF670
Cell	CK1-H2O	CK1-PF670
1	287201	269957
2	128290	291914
3	273194	356673
4	315139	1106670
5	130406	334151
6	401215	343434
7	196610	575252
8	94872	722809
9	115511	549397
10	689344	298635
11	122057	421402
12	319161	609867
13	512224	573667
14	117845	817952
15	222863	221604
16	1294387	249088
17	153312	407026
18	147604	1184339
19	1103857	595610
20	136478	895292
21	958749	410811
22	336873	146717
23	106497	623634
24	912364	632250
25	181551	468454
26	131628	288966
27	847422	579228
28	145037	503893
29	430433	530892
30	168790	254615
31	805651	495329
32	142381	191759
33	243666	540496
34	274864	469680
35	181721	934292
36	283104	312072
37	241493	352067
38	567378	521761
39	289415	185199
40	125665	257170
41	535483	513154
42	142894	319731
43	711569	372585
44	194053	209053
45	161522	313463
46	349455	1309251
47	303906	381662
48	393049	271254
49	337544	230946
50	173646	462611
51	248610	917277
52	265267	214319
53	918081	1066833
54		451160
55		364630
56		1896001
57		1039690
58		146076
59		269744
60		527984
61		339406
62		1350753
63		337495

## Sheet: Unpaired t-test
Table Analyzed	violin_IntegInt_nolabel_split
Group B	CK1-PF670
vs.	vs,
Group A	CK1-H2O
Unpaired t test
P value	0.0059
P value summary	**
Significantly different (P < 0.05)?	Yes
One- or two-tailed P value?	Two-tailed
t, df	t=2,805, df=114
How large is the effect?
Mean of group A	356063
Mean of group B	521097
Difference between means (B - A) ± SEM	165034 ± 58843
95% confidence interval	48467 to 281601
R squared (eta squared)	0.06455
F test to compare variances
F, DFn, Dfd	1,372, 62, 52
P value	0.2426
P value summary	ns
Significantly different (P < 0.05)?	No
Data analyzed
Sample size, group A	53
Sample size, group B	63
