# Supplementary material for: Nuclear CK1δ as a critical determinant of PER:CRY complex dynamics and circadian period
Source: eLife. 2026 Jun 15;15:RP110786. doi: 10.7554/eLife.110786 (PMC13268647; doi:10.7554/eLife.110786)
Supplement: Figure 5—source data 3. [file elife-110786-fig5-data3.xlsx]

## Sheet: CK1d-K38R_NES
Cell	CK1-K38R	NES-CK1-K38R
1	489573	6881638
2	294406	4993939
3	149268	3046976
4	304667	4097242
5	170745	1478428
6	312420	7310053
7	295991	799503
8	336410	961913
9	844153	2493077
10	613519	2149125
11	512067	1876184
12	429923	2964961
13	415035	1689413
14	912354	5007970
15	1355405	4267143
16	389407	2382376
17	995053	1871273
18	540611	4862787
19	487395	1261077
20	341942	1545405
21	660683
22	653110
23	1632336
24	1018201
25	413084
26	962201
27	658325
28	333192
29	598326
30	294039
31	439086
32	1006239
33	768092

## Sheet: Welch's t test of boxplot_Integ
Table Analyzed	boxplot_IntegInt
Column B	NES-CK1-K38R
vs.	vs,
Column A	CK1-K38R
Unpaired t test with Welch's correction
P value	<0,0001
P value summary	****
Significantly different (P < 0.05)?	Yes
One- or two-tailed P value?	Two-tailed
Welch-corrected t, df	t=5,783, df=19,73
How big is the difference?
Mean of column A	594765
Mean of column B	3097024
Difference between means (B - A) ± SEM	2502259 ± 432702
95% confidence interval	1598861 to 3405656
R squared (eta squared)	0.629
F test to compare variances
F, DFn, Dfd	31,72, 19, 32
P value	<0,0001
P value summary	****
Significantly different (P < 0.05)?	Yes
Data analyzed
Sample size, column A	33
Sample size, column B	20
