# Supplementary material for: Nuclear CK1δ as a critical determinant of PER:CRY complex dynamics and circadian period
Source: eLife. 2026 Jun 15;15:RP110786. doi: 10.7554/eLife.110786 (PMC13268647; doi:10.7554/eLife.110786)
Supplement: Figure 6—source data 3. [file elife-110786-fig6-data3.xlsx]

## Sheet: CRY-PER ratio
FOV	CK1-r/g	K38R-r/g
1	0.413532	0.50966
2	0.229193	0.502553
3	0.341472	0.523868
4	0.269032	0.505524
5	0.356454	0.514379
6	0.294262	0.423462
7	0.313011	0.706196
8	0.338014	0.694488
9	0.341498	0.811202
10	0.272933	0.489727
11	0.319242	0.511564
12	0.312228	0.494983
13	0.304529	0.404261
14	0.290476	0.399446
15	0.261675	0.381487
16	0.308289	0.327204
17	0.28917	0.327064
18	0.280512	0.316244
19	0.340532	0.411824
20	0.328609	0.415452
21	0.297723	0.419841

## Sheet: Unpaired t test
Table Analyzed	CRY-PER ratio
Group B	K38R
vs.	vs,
Group A	CK1δ
Unpaired t test
P value	<0,0001
P value summary	****
Significantly different (P < 0.05)?	Yes
One- or two-tailed P value?	Two-tailed
t, df	t=5,873, df=40
How large is the effect?
Mean of group A	0.3096
Mean of group B	0.4805
Difference between means (B - A) ± SEM	0,1709 ± 0,02909
95% confidence interval	0,1121 to 0,2297
R squared (eta squared)	0.463
F test to compare variances
F, DFn, Dfd	10,45, 20, 20
P value	<0,0001
P value summary	****
Significantly different (P < 0.05)?	Yes
Data analyzed
Sample size, group A	21
Sample size, group B	21
