# Supplementary material for: Nuclear CK1δ as a critical determinant of PER:CRY complex dynamics and circadian period
Source: eLife. 2026 Jun 15;15:RP110786. doi: 10.7554/eLife.110786 (PMC13268647; doi:10.7554/eLife.110786)
Supplement: Figure 7—source data 3. [file elife-110786-fig7-data3.xlsx]

## Sheet: NLS-CK1_MG132
Cell	NLS-CK1_DMSO	NLS-CK1_MG132
1	226386	1599179
2	993268	4144692
3	758832	2464484
4	93112	2968111
5	97081	2415022
6	91458	996458
7	114969	1049270
8	140280	623143
9	111024	2596437
10	159566	339967
11	185851	531341
12	101777	1903079
13	184783	3130772
14	170675	738673
15	123180	1250302
16	139166	2284204
17	118813	1323695
18	96288	2037230
19	159455	2159699
20	164515	2256484
21	169100	946292
22	88066	1089408
23	128285	2756751
24	361598	636277
25	301691	1383874
26	292503	2301817
27	324511	1888595
28	277523	488874
29	261067	549901
30	216586	1025870
31	111132	1761135
32	107110	1077375
33	429031	1028144
34	434050	1593120
35	511009	1491166
36	234003	1946970
37	114422	1897608
38	89206	2043076
39	101662	1864008
40	109602	1266928
41	270941	2062537
42	111874	2148547
43	286786	2435002
44	377587	1628061
45	119122	1368628
46	85189	687109
47	94814	2035152
48	220594	1120872
49	224953	612596
50	212233	1108014
51	83787	2659243
52	182719	748728
53	856787	3059761
54		2433055
55		2682270
56		824629
57		906643
58		1253113
59		2486090
60		2271333
61		700507
62		821300
63		811673
64		2457392
65		774843
66		3143455
67		715590
68		1539100
69		2422240
70		1014944

## Sheet: Unpaired t test
Table Analyzed	boxplot_IntegInt_NLS-CK1
Column B	NLS-CK1_MG132
vs.	vs,
Column A	NLS-CK1_DMSO
Unpaired t test
P value	<0,0001
P value summary	****
Significantly different (P < 0.05)?	Yes
One- or two-tailed P value?	Two-tailed
t, df	t=12,22, df=121
How big is the difference?
Mean of column A	226793
Mean of column B	1639741
Difference between means (B - A) ± SEM	1412948 ± 115601
95% confidence interval	1184086 to 1641810
R squared (eta squared)	0.5525
F test to compare variances
F, DFn, Dfd	18,83, 69, 52
P value	<0,0001
P value summary	****
Significantly different (P < 0.05)?	Yes
Data analyzed
Sample size, column A	53
Sample size, column B	70
