# Supplementary material for: Nuclear CK1δ as a critical determinant of PER:CRY complex dynamics and circadian period
Source: eLife. 2026 Jun 15;15:RP110786. doi: 10.7554/eLife.110786 (PMC13268647; doi:10.7554/eLife.110786)
Supplement: Figure 7—source data 4. [file elife-110786-fig7-data4.xlsx]

## Sheet: NES-CK1_MG132
Cell	NES-CK1_DMSO	NES-CK1_MG132
1	1015156	1549763
2	1030033	6679023
3	1078718	2821949
4	1326411	3818967
5	591909	7232649
6	1273736	2172280
7	766020	1355105
8	2423134	2175361
9	418895	1780343
10	1857338	703073
11	2586876	785602
12	958374	3143711
13	1953463	1430088
14	676155	1338747
15	574948	8043786
16	2557229	1986807
17	3278178	2437780
18	3002422	4024720
19	612645	5943381
20	4011694	5701288
21	3053706	4710585
22	1156627	5346003
23	5609990	2028670
24	1388837	1601375
25	3785822	9327553
26	541748	1780437
27	620663	3525954
28	1007793	2529314
29	1253931	1450168
30	3370201	1547920
31	1402073	1243341
32	1394562	1990104
33	544903	1693446
34	1019561	2340830
35	473222	1968807
36	1275764	1509654
37	655591	2704081
38	1064628	1771692
39	929604	908627
40	1163092	2409422
41	3366286	1739306
42	1295763	2433279
43	934093	3342447
44	2481963	2284439
45	2487586	13283210
46	962943	3059426
47	1115523	2224827
48	627648	3652212
49	898786	5155652
50	965461	3342020
51	2026642	3181867
52	4231678	1496690
53	5809336	6940459
54	4058645
55	3015774
56	805596
57	1862048
58	1958118
59	744838
60	4455691

## Sheet: Unpaired t test
Table Analyzed	boxplot_IntegInt_NES-CK1
Column B	NES-CK1_MG132
vs.	vs,
Column A	NES-CK1_DMSO
Unpaired t test
P value	0.0002
P value summary	***
Significantly different (P < 0.05)?	Yes
One- or two-tailed P value?	Two-tailed
t, df	t=3,900, df=111
How big is the difference?
Mean of column A	1796835
Mean of column B	3200910
Difference between means (B - A) ± SEM	1404076 ± 360060
95% confidence interval	690593 to 2117558
R squared (eta squared)	0.1205
F test to compare variances
F, DFn, Dfd	3,350, 52, 59
P value	<0,0001
P value summary	****
Significantly different (P < 0.05)?	Yes
Data analyzed
Sample size, column A	60
Sample size, column B	53
