# Supplementary material for: Nuclear CK1δ as a critical determinant of PER:CRY complex dynamics and circadian period
Source: eLife. 2026 Jun 15;15:RP110786. doi: 10.7554/eLife.110786 (PMC13268647; doi:10.7554/eLife.110786)
Supplement: Figure 7—source data 5. [file elife-110786-fig7-data5.xlsx]

## Sheet: NLS-mNG-CK1_1
Time (h)	NLS_PBS_1	NLS_PBS_2	NLS_PBS_3	NLS_PBS_4	NLS_DOX_1	NLS_DOX_2	NLS_DOX_3	NLS_DOX_4
0	-3868.62	-3156.6	-4409.94	-3381.27	-5174.02	-6975.9	-7352.83	-9237.6
0.5	-4302.29	-3444.86	-4750.64	-3626.79	-5500.71	-7415.91	-7829.84	-9967.67
1	-4688.27	-3731.79	-5080.14	-3837.49	-5823.12	-7797.37	-8252.75	-10647.3
1.5	-5060.54	-4004.9	-5374.14	-4031.6	-6102.42	-8126.44	-8648.81	-11245.2
2	-5424.16	-4245.74	-5633.92	-4214.13	-6330.1	-8356.67	-8929.59	-11724.8
2.5	-5810.05	-4474.2	-5842.23	-4367.85	-6504.57	-8519.93	-9158.82	-12137.8
3	-6061.66	-4634.29	-5940.33	-4430.39	-6535.92	-8522.83	-9212.2	-12407.5
3.5	-5996.81	-4595.38	-5915.87	-4365.33	-6423.42	-8322.33	-9042.16	-12360.5
4	-5924.52	-4560.32	-5755.7	-4240.2	-6187.21	-7925.23	-8659.07	-12087.6
4.5	-5787.8	-4484.83	-5531.8	-4046.66	-5816.14	-7403.66	-8126.26	-11563.3
5	-5461.1	-4277.35	-5198.21	-3711.98	-5258.75	-6640.82	-7367.16	-10713.4
5.5	-5117.25	-4102.13	-4770.49	-3382.31	-4666.51	-5828.46	-6458.56	-9733.57
6	-4611.35	-3662.52	-4241.67	-2948	-3912.83	-4817.92	-5481.36	-8487.35
6.5	-4061.33	-3369.27	-3655.82	-2493.78	-3097.38	-3768.58	-4394.49	-7051.66
7	-3587.44	-2904.59	-3019.42	-2024.74	-2184.54	-2577.43	-3275.62	-5523.6
7.5	-3095.19	-2506.38	-2459.53	-1652.08	-1399.38	-1501.56	-2164.96	-3940.28
8	-2412.83	-1887.62	-1770.24	-1173.57	-507.214	-347.714	-1015.62	-2261.4
8.5	-1753.33	-1294.91	-1145.34	-835.306	242.196	651.98	73.2625	-616.927
9	-937.393	-595.711	-543.516	-355.474	1089.75	1746.92	1027.78	1115.12
9.5	-269.451	-112.213	-1.35873	-59.654	1710.09	2511.38	2017.93	2584.54
10	527.957	656.556	525.478	333.009	2360.06	3357.66	2865.79	4164.86
10.5	1139.49	1075.15	887.55	623.289	2828.97	3977.46	3654.91	5330.2
11	1978.23	1733.71	1439.67	1054.65	3363.37	4540.85	4289.01	6681.83
11.5	2641.8	2189.02	1912.8	1363.08	3713.94	4955.49	4801.76	7742.45
12	3445.34	2746.01	2543.23	1827.82	4201.04	5419.91	5215.38	8774.71
12.5	3851.41	3062.46	2954.5	1994.87	4260.41	5386.5	5396.31	9024.73
13	4312.27	3417.42	3416.31	2284.06	4404.56	5360.78	5392.1	9270.81
13.5	4624.18	3558.01	3761.27	2502.42	4321.98	5122.6	5264.75	9000.76
14	5031.12	3862.53	4269.52	2814.52	4198.45	4844.01	4984.28	8866.53
14.5	5156.64	3921.16	4584.66	2984.26	3901.6	4423.22	4661.64	8283.47
15	5309.64	4045.69	4851.17	3158.21	3612.81	3966.01	4231.58	7551.77
15.5	5370.44	4075.71	4979.7	3296.17	3005.45	3226.66	3579.49	6359.86
16	4968.29	3707.3	4750.84	3144.45	2247.95	2301.06	2720.17	4950.86
16.5	4847.84	3711.99	4827.77	3218.78	1656.12	1463.79	1709.63	3670.37
17	4521.77	3350.12	4432.21	2917.56	707.503	374.811	603.74	2191.49
17.5	4029.18	2996.37	4035.08	2598.17	-223.226	-747.483	-626.446	661.354
18	3490.75	2586.44	3426.37	2203.66	-1257.39	-1987.07	-1898.19	-1101.76
18.5	2947.71	2090.89	2849.75	1830.97	-2246.76	-3226.59	-3205.3	-2807.85
19	2134.49	1362.8	2089.63	1212.91	-3334.77	-4523.19	-4410.21	-4609.99
19.5	1879.04	1156	1716.14	961.243	-4030.02	-5440.96	-5406.36	-5910.03
20	1150.17	409.403	749.494	271.214	-4989.2	-6599.04	-6373.89	-7558.24
20.5	654.077	72.0257	340.84	3.74571	-5536.94	-7315.05	-7226.06	-8823.04
21	87.7486	-416.086	-305.731	-507.297	-6183.28	-8098.61	-7924.68	-10041.8
21.5	-309.517	-716.806	-693.237	-866.914	-6479.45	-8526.37	-8530.81	-10929.8
22	-837.357	-1086.6	-1268.19	-1384.78	-6874.25	-8942.96	-8920.77	-11646.9
22.5	-1212.99	-1300.54	-1745.55	-1713.28	-6872.03	-9123.7	-9173.61	-12058.9
23	-1760.99	-1716.88	-2381.62	-2219.47	-7061.2	-9224.51	-9253.68	-12193.5
23.5	-2140.81	-1944.55	-2733.29	-2513.73	-6852.17	-9114.89	-9123.78	-12042.2
24	-2477.58	-2159.61	-3196.59	-2897.95	-6580.71	-8841.83	-8706.49	-11533.3
24.5	-2624.31	-2299.24	-3492.8	-3113.73	-6070.59	-8291.6	-8029.55	-10822.8
25	-2870.2	-2493.1	-3867.9	-3344.38	-5521.33	-7653.78	-7105.55	-9917.42
25.5	-2847.44	-2507.99	-4015.63	-3398.71	-4584.78	-6792.36	-5968.52	-8510.88
26	-3624.61	-2986.37	-4652.68	-3891.09	-4327.62	-6214.81	-5109.35	-7724.63
26.5	-2524.96	-2070.38	-3696.19	-3202.48	-2082.23	-3795.03	-2900.21	-4363.56
27	-3106.96	-2438.18	-4207.07	-3593.31	-1829.83	-3182.85	-1981.4	-2865.02
27.5	-2665.38	-2142.96	-3799.99	-3228.4	-1135.02	-972.651	-109.06	-523.96
28	-2734.52	-2098.05	-3670.23	-3158.27	-88.1886	201.651	1586.12	1625.85
28.5	-2378.03	-1585.61	-3136.35	-2794.73	1258.34	1931.28	3401.34	3752.87
29	-1955.94	-1374.04	-2566.66	-2409.75	2438.22	3643.51	5062.05	6115.23
29.5	-887.68	-659.183	-1538.63	-1621.04	4171.39	5643.63	7162.61	8914.2
30	-1727.49	-1116.16	-1980.52	-1855.05	3880.04	5754.44	7521.87	9021.5
30.5	-527.774	-278.851	-938.197	-873.18	5680.93	7901.34	9252.03	11215.1
31	-656.02	-253.003	-867.797	-703.311	6631.41	8197.17	9939.39	12256.7
31.5	-28.8571	246.62	-343.209	5.40286	7497.19	9600.83	10676.4	13378.1
32	128.389	184.123	-219.837	364.491	7598.67	9957.64	10878.6	14156.5
32.5	395.583	619.06	151.449	878.569	7908.32	10354.3	11085.4	14244
33	501.649	723.331	547.089	1215.85	7826.39	10483.9	10952.4	14449.4
33.5	1064.65	981.06	1098.96	1734.4	7861.2	10569.1	11144.6	14374
34	1557.7	1399.73	1751.15	2267.19	7783.79	10384.9	11017.8	13894.5
34.5	2015.29	1633.57	2215.58	2703.46	7711.06	10050.5	10594	13330.6
35	2428.91	1883.84	2851.49	3129.3	7220.12	9460.55	10018.5	12400.5
35.5	2731.23	2004.78	3305.35	3451.9	6829.02	8844.15	9392.66	11458.5
36	2971.35	2141.95	3712.03	3755.99	6130.98	8147.65	8632.34	10295.9
36.5	3150.64	2230.69	3826.76	4032.68	5371.11	7341.9	7853.27	9000.4
37	3510.47	2547.6	4257.05	4385.51	4933.25	6650.3	6926.98	7753.23
37.5	3231	2348.9	4201.88	4368.32	3914.99	5590	5797.65	6297.99
38	3227.55	2578	4460.16	4494.51	3185.04	4628.32	4632.52	4520.67
38.5	3091.07	2452.76	4334.02	4393.27	2511.93	3497.43	3267.31	2957.84
39	3148.28	2605.48	4449.65	4403.03	1803.7	2614.33	2232.38	1572.43
39.5	2889.62	2402.34	4158.75	4232.57	963.037	1545.31	1015.33	210.917
40	2749.3	2373.71	4102.46	4075.6	334.537	525.054	-231.886	-1302.63
40.5	2527.15	2160.88	3963.1	3802.34	-271.606	-381.989	-1194.53	-2398.57
41	2291.04	1952.78	3801.7	3522.09	-907.063	-1353.48	-2291.29	-3613.05
41.5	1996.41	1542.58	3357.21	3142.14	-1685.49	-2219.65	-3193.91	-4638.27
42	1630.26	1360.81	3112.14	2829.13	-2308.73	-2951.36	-3857.77	-5576.98
42.5	1313.44	1136.84	2756.22	2558.79	-2675.8	-3609.61	-4442.18	-6357.57
43	1165.92	986.386	2541.83	2233.04	-2907.09	-4115.17	-4928.02	-6777.17
43.5	961.629	780.06	2148.98	1823.67	-3166.72	-4596.81	-5295.87	-7251.3
44	628.929	533.409	1669.92	1382.21	-3451.47	-4892.97	-5790.94	-7583.36
44.5	214.68	307.437	1200.99	1000.74	-3571.24	-5109.43	-6050.94	-7758.89
45	-110.683	154.209	870.406	596.414	-3691.41	-5200.86	-6087.73	-7620.89
45.5	-399.049	-66.0029	422.091	157.286	-3703.57	-5160.14	-5994.44	-7430.98
46	-613.871	-198.786	140.5	-262.689	-3644.28	-4993.78	-5924.75	-7161.24
46.5	-839.669	-343.831	-146.143	-570.846	-3360.39	-4729.7	-5626.89	-6838.45
47	-1016.55	-493.349	-390.12	-791.08	-3030.87	-4328.71	-5330.83	-6218.37
47.5	-1303.07	-695.117	-748.643	-1059.33	-2709.19	-3968.67	-4871.97	-5668.05
48	-1378.51	-806.769	-987.409	-1327.04	-2394.18	-3517.4	-4327.05	-5048.17
48.5	-1161.12	-978.623	-1403.15	-1604.15	-2071.14	-2984.52	-3775.81	-4377.07
49	-19.28	-198.594	-440.329	-1063.37	-784.117	-1554.91	-2264.41	-1765.43
49.5	-89.2057	-253.451	-573.897	-1112.47	-101.291	-742.663	-1080.64	-126.537
50	-331.24	-571.474	-1041.43	-1407.06	203.063	-325.446	-778.606	376.351
50.5	-359.72	-476.774	-1055.84	-1479.88	616.146	392.409	-51.0914	1287.36
51	-312.929	-426.197	-1080.5	-1434.17	1112.12	1172.84	885.414	2437.71
51.5	-277.774	-411.449	-1148.39	-1461.09	1677.45	1906.49	1886.85	3526.62
52	-410.551	-206.749	-840.029	-1198.33	2343.97	2713.44	2729.19	4625.04
52.5	-1186.44	-828.357	-1698.12	-1732.21	2177.59	2705.88	2744.49	4095.73
53	-1200.73	-886.209	-1779.64	-1688.41	2394.45	3091.36	2934.5	4036.69
53.5	-949.609	-633.3	-1497.47	-1456.86	2725.76	3733.28	3814.32	4921.12
54	-887.986	-623.489	-1317.79	-1330.53	3023.9	4197.09	4382.05	5323.1
54.5	-808.651	-563.309	-1267.1	-1231.75	3097.59	4371.17	4651.73	5436.02
55	-739.597	-557.151	-1209.35	-1115.8	3038	4447.97	4732.81	5453.15
55.5	-878.331	-704.786	-1315.03	-1138.12	2884.8	4371.45	4695.13	5017.25
56	-1200.45	-823.166	-1447.55	-1114.56	2518.43	4041.13	4402.48	4329.1
56.5	-971.537	-655.974	-1215.95	-984.689	2375.14	3995.45	4316.31	4213.85
57	-984.583	-548.043	-1022.97	-780.32	2203.59	3816.07	4236.52	3963.5
57.5	-938.429	-555.36	-1060.14	-719.771	1905.44	3463.03	3902.06	3538.95
58	-777.014	-416.577	-791.891	-566.174	1770.59	3314.52	3599.47	3230.91
58.5	-575.42	-220.471	-491.957	-291.957	1676.58	3103.15	3370.91	2850.33
59	-348.831	-40.5286	-209.649	-72.7371	1567.96	2918.85	3147.63	2684.96
59.5	-221.754	43.2971	-36.24	98.3229	1380.97	2579.93	2891.8	2399.18
60	-197.686	71.4686	81.3571	219.126	1060.62	2154.53	2456.82	1783.57
60.5	-140.974	56.4171	178.354	232.551	768.234	1739.75	1998.2	1247.16
61	-121.731	53.7914	161.274	300.889	451.334	1292.89	1612.42	857.386
61.5	-39.1029	78.2286	282.286	441.511	190.591	868.451	1175.01	343.389
62	-117.929	64.8114	339.674	453.949	-127.783	471.217	726.377	-84.8486
62.5	-45.3371	75.3543	330.177	474.023	-450.226	-9.61143	213.817	-520.931
63	144.514	254.351	581.331	627.097	-516.46	-101.794	32.6914	-684.409
63.5	157.26	260.446	587.874	683.08	-670.06	-439.029	-287.649	-889.289
64	186.651	326.46	631.889	728.669	-796.791	-678.657	-647.9	-1226.14
64.5	101.683	313.337	710.286	745.554	-897.9	-888.26	-941.469	-1480.53
65	48.98	281.923	590.04	673.149	-1034.27	-1216.81	-1228.72	-1725.34
65.5	80.6571	262.814	564.351	676.317	-1100.34	-1366.22	-1508.74	-1963.39
66	-20.3029	234.58	562.309	644.58	-1146.72	-1472.14	-1582.02	-2040.02
66.5	31.4457	223.549	523.526	655.043	-1197.64	-1596.23	-1782.09	-2016.78
67	-26.4543	189.423	487.146	564.646	-1213.43	-1631.32	-1778.7	-2014.88
67.5	-147.483	78.9457	314.257	482.586	-1249.46	-1715.71	-1838.61	-1995.75
68	-69.62	84.3029	249.731	444.286	-1193.76	-1766.71	-1869.71	-2016.55
68.5	-165.077	27.4686	228.406	378.394	-1182.66	-1625.04	-1786.65	-1872.27
69	-240.5	-49.6371	39.2743	241.151	-1149.35	-1620.07	-1752.89	-1707.45
69.5	-256.371	-70.3571	-60.6743	128.666	-1080.51	-1538.12	-1709.11	-1650.38
70	-342.829	-157.651	-136.434	-2.39429	-999.954	-1496.57	-1572.98	-1540.95
70.5	-381.703	-230.374	-270.683	-113.96	-949.297	-1426.8	-1490.25	-1394.29
71	-303.96	-255.214	-295.414	-144.154	-800.451	-1286.38	-1367.43	-1108.31
71.5	96.0343	-119.526	-70.9114	-87.2086	-480.571	-963.071	-933.726	-365.566
72	428.949	119.534	217.763	102.691	-68.4886	-677.543	-448.666	211.806
72.5	464.866	91.7057	225.206	57.1714	120.131	-513.086	-129.971	532.563
73	448.054	-5.11143	104.937	-43.6686	166.671	-537.689	-23.9629	731.74
73.5	579.786	44.1029	128.531	-9.32571	359.697	-258.791	180.194	1064.82
74	541.891	15.3	95.0029	-41.1514	513.463	16.5914	397.206	1329.87
74.5	520.331	11.6057	46.6371	-92.2943	624.58	185.309	631.771	1501.4
75	107.537	-129.077	-205.837	-239.117	501.84	255.989	595.086	1270.35
75.5	-145.057	-372.437	-537.403	-468.689	360.9	291.043	477.66	1114.73
76	-90.2743	-273.649	-422.366	-381.297	483.183	563.054	652.497	1353.33
76.5	-88.2114	-207.131	-376.034	-332.597	635.086	859.091	832.283	1506.84
77	-171.686	-241.354	-423.686	-388.683	668.283	943.64	901.054	1590.78
77.5	-208.266	-214.363	-391.917	-377.009	722.034	939.9	857.051	1563.9
78	-246.691	-191.397	-349.451	-384.52	714.723	1027.55	822.534	1571.2
78.5	-331.983	-235.403	-398.12	-429.82	726.194	1023.33	784.251	1475.33
79	-412.963	-267.4	-463.694	-470.529	665.131	976.817	701.469	1344.37
79.5	-447.711	-323.069	-543.746	-534.149	526.046	886.151	544.957	1173.72
80	-471.603	-328.706	-521.149	-532.329	454.974	872.543	419.777	1092.31
80.5	-458.817	-291.429	-474.649	-494.666	377.803	785.14	367.954	963.551
81	-419.557	-293.174	-461.651	-471.649	293.337	710.517	294.711	811.831
81.5	-330.011	-240.231	-364.926	-360.843	264.774	621.426	249.614	756.8
82	-251.686	-189.24	-260.034	-270.866	301.52	556.369	226.337	730.791
82.5	-279.34	-183.951	-224.543	-268.409	253.709	492.194	131.886	641.829
83	-214.869	-143.194	-194.697	-221.769	257.586	407.9	90.8514	452.029
83.5	-210.811	-156.589	-145.129	-214.126	234.723	328.637	33.1	269.314
84	-234.831	-191.923	-210.334	-221.66	175.386	229.383	-101.546	24.94
84.5	-162.646	-154.834	-148.877	-161.309	165.3	178.394	-114.666	-61.3229
85	-222.06	-207.394	-176.443	-207.954	57.28	162.669	-191.666	-277.1
85.5	-158.783	-176.883	-159.543	-182.163	-54.22	100.311	-296.74	-499.466
86	-46.3829	-92.8114	-62.9543	-78.5143	-47.9429	83.4486	-251.831	-559.883
86.5	-114.363	-125.594	-70.4914	-87.4029	-121.717	-72.9314	-372.231	-686.643
87	14.8943	-47.36	0.388571	18.4657	-148.791	-133.066	-402.86	-758.76
87.5	63.2029	-4.55429	87.4371	66.22	-195.189	-191.034	-376.24	-771.103
88	30.3657	0.285714	54.0029	22.5743	-259.174	-275.514	-427.974	-835.897
88.5	104.711	25.2571	43.2857	44.1914	-274.786	-406.823	-459.454	-863.246
89	158.34	59.9086	69.7	78.8914	-258.7	-423.909	-453.926	-828.16
89.5	195.72	62.7371	94.3429	91.9514	-293.869	-448.849	-497.806	-863.094
90	253.74	115.891	134.006	137.477	-308.269	-407.991	-465.983	-866.237
90.5	216.04	97.44	86.68	101.466	-348.023	-491.091	-483.094	-914.194
91	181.183	53.5457	33.9857	92.14	-398.206	-500.86	-538.397	-914.826
91.5	202.526	71.2629	82.0486	144.634	-430.226	-444.837	-512.174	-930.149
92	134.097	42.6743	74.8857	142.823	-419.051	-391.057	-533.797	-885.991
92.5	64.2943	37.36	83.7143	122.823	-473.169	-360.691	-539.886	-864.411
93	63.0171	53.8629	84.2086	164.334	-486.783	-366.069	-468.031	-758.291
93.5	-39.7	-0.55714	85.7371	133.211	-527.551	-399.066	-421.829	-685.234
94	-1.37143	121.886	171.006	215.514	-496.214	-265.194	-298.894	-502.706
94.5	-3.18286	192.957	243.9	278.374	-349.703	-119.714	-167.08	-333.706
95	-8.9	257.506	265.417	284.311	-278.083	-86.3429	-73.6743	-161.394
95.5	156.246	392.617	363.066	377.406	-165.911	91.96	130.326	-34.8057
96	178.206	421.54	363.577	394.529	-66.3086	115.271	215.357	128.666
96.5	167.18	381.3	347.283	342.114	31.32	172.103	247.394	213.711
97	227.16	383.103	288.4	307.571	125.783	313.32	339.429	286.597
97.5	138.234	276.357	203.503	220.274	183.706	336.74	386.4	314.449
98	142.96	215.663	115.971	110.96	123.96	345.606	377.271	271.246
98.5	121.971	183.977	105.691	113.583	150.346	443.209	455.12	333.729
99	5.90286	93.7571	12.64	44.64	138.811	320.54	441.337	347.894
99.5	14.2971	44.0771	-28.0629	-8.78571	132.4	328.394	471.26	310.543
100	13.7914	94.9029	-10.5229	-2.69714	125.98	343.394	551.646	344.903
100.5	-13.8571	76.5171	-18.9257	-20.24	114.231	301.097	549.791	387.329
101	-37.4229	8.13429	-104.743	-88.1771	82.4314	224.429	491.257	368.711
101.5	-52.12	28.2	-61.9657	-43.6971	146.251	152.754	523.589	379.369
102	-58.5714	-22.72	-118.194	-86.0057	166.289	42.84	461.189	295.494
102.5	-84.1286	-64.5914	-151.446	-168.531	125	2.11143	421.511	212.911
103	-110.797	-58.8857	-113.14	-147.957	148.6	-1.48857	467.423	229.811
103.5	-119.654	-59.0886	-114.909	-137.537	236.566	-21.4029	423.406	178.717
104	-85.6714	-37.7343	-94.8743	-116.109	258.514	-100.68	411.826	147.837
104.5	-38.5571	8.54571	-16.6457	-55.2314	303.526	-83.1057	414.243	101.606
105	-20.2486	-41.1429	-26.1829	-105.2	243.506	-135.449	338.174	73.82
105.5	-7.80857	-37.5514	-24.8943	-102.686	220.209	-122.3	362.811	85.6771
106	-42.1914	-80.4514	-43.9457	-109.243	185.271	-171.56	263.9	28.08
106.5	-67.7257	-142.206	-152.54	-188.326	120.851	-231.023	99.0457	-77.82
107	-98.4429	-203.866	-213.274	-233.969	26.4629	-239.417	-7.45429	-153.409
107.5	-135.506	-247.646	-256.931	-268.423	-25.1057	-253.677	-116.483	-178.38
108	-148.106	-290.403	-304.84	-311.52	-93.2771	-284.014	-161.374	-226.194
108.5	-156.271	-273.837	-309.04	-289.306	-107.171	-270.329	-181.434	-255.951
109	-154.12	-282.24	-314.257	-293.989	-120.083	-302.64	-337.991	-325.443
109.5	-151.997	-268.617	-335.683	-288.037	-116.346	-303.846	-358.577	-348.12
110	-133.746	-235.52	-304.76	-229.569	-131.337	-280.046	-361.989	-364.226
110.5	-116.8	-260.789	-301.749	-224.169	-159.154	-321.703	-401.234	-394.86
111	-78.12	-219.343	-248.02	-185.129	-146.434	-248.769	-392.42	-430.591
111.5	-68.0171	-190.577	-223.466	-161.76	-136.669	-220.911	-410.303	-430.957
112	-57.9971	-189.423	-257.469	-180.103	-150.98	-210.14	-450.174	-437.806
112.5	-40.4971	-161.131	-230.62	-153.46	-184.091	-159.674	-434.917	-455.511
113	-22.0343	-153.32	-203.371	-119.783	-197.297	-138.674	-401.431	-409.834
113.5	-14.2286	-150.026	-185.423	-123.526	-216.206	-149.823	-384.609	-400.52
114	-5.50857	-117.909	-173.509	-114.889	-226.611	-142.889	-359.5	-387.34
114.5	-11.3686	-94.58	-170.477	-79.5514	-257.326	-92.8	-322.371	-356.957
115	2.73429	-72.0314	-151.823	-48.0514	-240.263	-132.4	-317.811	-353
115.5	10.1771	-49.0171	-116.117	-8.74286	-241.617	-110.243	-288.903	-350.386
116	-3.05143	-46.7057	-114.697	-7.11429	-240.523	-124.626	-255.217	-298.703
116.5	-35.26	-91.0829	-159.114	-48.3629	-311.371	-183.226	-361.72	-378.246
117	180.78	112.166	120.191	111.1	-152.451	33.1829	-160.449	-150.031
117.5	257.897	226.243	285.034	185.214	-54.1914	77.3686	-37.5571	-72.9143
118	301.477	239.491	355.04	182.386	-40.7657	9.45143	-36.8457	-41.3314
118.5	313.771	268.703	391.383	191.146	-53.0571	53.0514	14.7171	36.0057
119	344.331	298.317	450.163	215.089	3.39429	82.3229	11.5829	120.437
119.5	365.214	304.989	483.363	199.88	12.1514	128.429	14.8	137.374
120	402.411	387.766	566.34	258.174	114.949	226.7	130.983	252.874
120.5	225.594	234.617	355.034	135.529	48.6943	53.0257	-15.2514	121.02
121	164.734	149.32	229.234	83.6971	0.08	36.9314	-104.26	106.014
121.5	147.214	151.369	186.677	87.8314	27.3429	84.5314	-82.4343	134.503
122	135.509	148.989	166.569	80.0029	63.2457	103.203	-84.1286	114.72
122.5	108.126	132.249	150.02	70.7	74.12	84.1486	-32.3543	111.691
123	79.8314	141.043	157.846	109.191	107.866	80.9657	42.7914	119.677
123.5	49.5306	109.694	137.633	103.612	78.6326	-5.28571	-14.2449	103.102
124	7.47917	82.3333	99.2798	69.7381	-17.9256	-77.0833	-93.3244	4.77381
124.5	-64.5562	39.7477	50.2128	37.1702	-78.6748	-136.684	-156.818	-87.8723
125	-121.043	-19.5839	-11.5776	-20.1708	-128.351	-263.065	-301.484	-224.568
125.5	-162.305	-44.4476	-44.8	-46.7079	-171.959	-317.467	-373.648	-269.492
126	-186.951	-71.039	-79.5195	-85.224	-224.292	-367.37	-439.149	-333.545
126.5	-217.588	-88.4153	-139.156	-121.043	-255.033	-437.635	-556.502	-394.02
127	-210.643	-90.619	-165.905	-155.762	-301.119	-471.429	-581.762	-496.667
127.5	-240.711	-127.537	-207.077	-184.265	-323.328	-509.951	-662.85	-528.105
128	-251.018	-147.286	-247.464	-198.664	-379.986	-587.875	-727.154	-601.718
128.5	-201.593	-118.465	-210.963	-161.103	-386.538	-548.172	-634.974	-555.656
129	-223.789	-145.113	-209.094	-173.692	-430.65	-624.594	-672.271	-615.177
129.5	-267.629	-197.166	-278.537	-207.707	-512.996	-718.201	-779.463	-741.541
130	-299.813	-254.417	-331.778	-247.988	-575.52	-780.214	-804.984	-838.417
130.5	-353.714	-330.029	-412.4	-287.514	-628.857	-872.2	-864.457	-927.057
131	-325.513	-326.248	-431.773	-285.517	-627.622	-925.521	-823.366	-971.307
131.5	-334.528	-332.177	-428.143	-315.177	-653.364	-990.788	-801.459	-1008.84
132	-400.031	-397.795	-520.732	-390.83	-742.732	-1134.05	-897.839	-1136.14
132.5	-376.77	-421.276	-570.687	-398.959	-764.415	-1172.68	-900.986	-1187.28
133	-342.276	-398.281	-561.567	-398.114	-749.152	-1206.48	-863.762	-1198.3
133.5	-312.793	-380.049	-565.384	-378.498	-771.394	-1259.41	-912.783	-1244.45
134	-306.321	-371.321	-570.179	-392.821	-827.571	-1324	-991.679	-1314.96
134.5	-294.407	-355.815	-542.5	-377.222	-829.759	-1308.93	-978.667	-1314.85
135	-242.131	-333.946	-527.462	-344.915	-779.308	-1275.34	-980.392	-1293.37
135.5	-220.84	-301.74	-492.62	-303.91	-736.43	-1229.94	-971.59	-1283.99

## Sheet: NLS-mNG-CK1_2
Time (h)	NLS_PBS_1	NLS_PBS_2	NLS_PBS_3	NLS_PBS_4	NLS_PBS_5	NLS_DOX_1	NLS_DOX_2	NLS_DOX_3	NLS_DOX_4	NLS_DOX_5
0	-201.596	-208.904	-150.558	-260.654	-147.442	-332.769	-475.519	-450.058	-536.077	-516.654
0.5	-252.593	-261.326	-171.378	-294.289	-175.141	-385.267	-535.207	-513.437	-598.815	-583.022
1	-312.833	-320.286	-223.452	-340.119	-218.845	-436.738	-610.964	-588.167	-685.405	-675.393
1.5	-379.143	-388.049	-280.502	-401.69	-266.749	-506.768	-677.562	-673.305	-768.828	-781.241
2	-430.71	-462.224	-338.652	-438.538	-300.09	-557.943	-748.648	-740.981	-816.805	-866.405
2.5	-513.184	-548.793	-419.203	-508.935	-354.438	-649.124	-841.682	-823.567	-924.429	-974.244
3	-625.134	-662.129	-516.835	-599.29	-432.17	-741.089	-953.871	-921.054	-1034.32	-1099.14
3.5	-729.948	-782.26	-609.468	-687.277	-514.212	-839.208	-1052.79	-1020.75	-1145.54	-1227.71
4	-838.433	-896.861	-722.563	-776.349	-601.324	-934.798	-1142.88	-1112.44	-1248.61	-1356.2
4.5	-934.114	-1004.74	-814.343	-864.486	-677.314	-1022.37	-1222.11	-1194.49	-1340.71	-1464.57
5	-1011.73	-1097.4	-893.683	-932.179	-750.706	-1074.78	-1296.45	-1258.04	-1404.15	-1535.32
5.5	-1070.93	-1160.14	-934.977	-982.544	-816.768	-1114.61	-1313.03	-1283.97	-1449.43	-1576.95
6	-1105.99	-1200.79	-964.075	-1003.33	-849.62	-1111.55	-1310.83	-1289.29	-1439.26	-1572.21
6.5	-1116.61	-1209.34	-955.432	-1012.79	-864.066	-1083.32	-1260.77	-1247.45	-1389.29	-1521.56
7	-1098.04	-1181.91	-936.804	-985.95	-858.386	-1001.13	-1176.58	-1176.66	-1284.83	-1423.88
7.5	-1045.7	-1127.14	-889.895	-940.585	-830.265	-899.125	-1058.42	-1063.07	-1152.05	-1303.51
8	-987.786	-1048.81	-839.31	-860.643	-786.071	-755.952	-876.381	-912.262	-961.19	-1124.67
8.5	-898.086	-950.252	-762.183	-780.89	-717.047	-601.595	-685.731	-729.332	-749.535	-896.934
9	-785.133	-825.581	-676.867	-673.607	-618.753	-410.792	-457.763	-526.675	-519.159	-645
9.5	-652.93	-687.603	-555.283	-555.997	-528.349	-201.359	-199.829	-289.689	-248.108	-376.34
10	-500.745	-540.04	-440.516	-414.453	-419.683	15.8789	73.5466	-42.0342	45.6925	-74.7453
10.5	-351.912	-360.605	-309.085	-277.766	-312.498	243.337	368.964	242.824	345.316	229.258
11	-208.083	-199.182	-156.83	-127.973	-185.67	472.708	648.917	510.345	670.152	553.934
11.5	-19.2245	-26.0204	12.898	20	-50.1633	692.98	882.286	772.367	935.225	860.673
12	165.06	165.534	168.783	185.137	93.6171	893.763	1134.91	1014.63	1220.85	1130.81
12.5	307.629	336.389	304.56	316.309	204.137	1070.64	1298.17	1220.76	1428.75	1365.25
13	445.377	493.063	428.651	461.197	308.303	1223.47	1458.96	1371.34	1634.94	1553.64
13.5	570.783	643.5	558.303	582.449	424.52	1332.53	1579.73	1500.72	1775.72	1690.9
14	715.526	774.066	675.246	712.363	540.826	1399.28	1635.23	1551.78	1850.79	1796.74
14.5	861.523	921.226	762.417	816.426	647.186	1438.56	1661.7	1590.9	1853.63	1839.38
15	987.043	1056.11	846.303	909.966	726.829	1417.06	1649.47	1566.81	1846.13	1865.96
15.5	1066.21	1146.35	931.357	996.257	784.277	1370.65	1595.15	1506.1	1780.99	1824.54
16	1147.56	1217.87	1012.71	1069.61	832.68	1269.47	1514.35	1394.37	1672.18	1727.47
16.5	1198.34	1288.77	1060.58	1119.38	894.983	1146.07	1364.45	1278.23	1481.58	1620.31
17	1252.1	1357.45	1101.38	1147.82	940.626	1017.75	1179.59	1122.41	1276.29	1473.03
17.5	1272.15	1361.66	1112.26	1151.43	947.011	862.903	992.086	957.734	1062.5	1283.79
18	1275.8	1353.3	1117.64	1140.19	935.243	682.994	787.989	746.4	828.423	1085.99
18.5	1236.32	1312.74	1098	1110.43	920.369	516.097	565.88	565.331	585.074	863.531
19	1207.18	1269.54	1053.5	1057.83	904.726	351.449	322.946	369.234	315.769	614.597
19.5	1146.23	1199.31	981.94	970.349	869.209	175.451	100.234	185.46	78.7771	388.874
20	1082.53	1096.64	896.174	881.026	809.126	-0.15143	-115.314	-6.66571	-167.551	132.674
20.5	982.146	985.163	799.703	792.789	713.694	-183.029	-319.414	-186.106	-411.58	-129.217
21	871.706	877.046	721.254	692.926	639.691	-359.711	-519.654	-361.96	-652.94	-362.877
21.5	734.889	761.097	627.289	595.551	549.074	-499.591	-705.08	-528.894	-868.906	-601.603
22	597.149	635.366	510.214	492.06	458.203	-639.1	-873.594	-698.549	-1048.74	-841.994
22.5	459.963	504.557	406.874	393.166	346.186	-772.263	-1010.43	-830.126	-1235.37	-1016.27
23	330.011	384.249	296.557	287.457	244.406	-861.54	-1152.61	-970.02	-1382.11	-1198.49
23.5	196.709	242.929	210.046	187.663	154.309	-957.251	-1265.03	-1086.52	-1483.91	-1350.28
24	58.1486	102.069	99.02	83.7429	60.28	-1007.2	-1373.86	-1191.72	-1568.3	-1445.03
24.5	-77.1914	-15.2429	-6.65429	-26.4457	-39.3857	-1041.61	-1457.55	-1258.19	-1605.54	-1531.86
25	-192.254	-132.914	-103.546	-120.62	-121.323	-1086.2	-1514.08	-1303.82	-1619.97	-1583.4
25.5	-296.363	-252.549	-181.489	-217.409	-195.917	-1119.02	-1545	-1334.43	-1651.08	-1606.17
26	-393.037	-359.851	-268.991	-330.986	-250.04	-1114.77	-1553.28	-1364.49	-1614.55	-1601.6
26.5	-486.951	-480.189	-352.237	-416.611	-329.583	-1107.87	-1554.99	-1368.02	-1571.71	-1572.89
27	-581.103	-562.263	-441.231	-516.857	-407.846	-1086.81	-1517.36	-1344.32	-1504.16	-1530.4
27.5	-645.694	-654.943	-500.5	-600.657	-464.806	-1068.89	-1440.02	-1302.47	-1411.03	-1477.62
28	-710.771	-730.097	-572.514	-660.586	-502.169	-1028.75	-1356.95	-1248.37	-1305.85	-1397.75
28.5	-758.066	-822.131	-635.711	-727.051	-555.831	-962.509	-1268.1	-1172	-1178.71	-1298.02
29	-796.626	-879.083	-678.726	-785.269	-593.511	-877.746	-1142.37	-1059.16	-1024.27	-1170.75
29.5	-841.831	-930.143	-723.84	-837.114	-632.74	-791.089	-987.409	-933.169	-850.469	-1029.2
30	-887.371	-967.791	-757.974	-885.423	-659.491	-706.843	-809.94	-775.094	-657.814	-869.263
30.5	-896.871	-986.094	-784.997	-925.14	-666.28	-586.86	-614.614	-636.151	-466.417	-692.62
31	-915.34	-1016.39	-815.8	-946.049	-676.154	-459.937	-428.631	-460.271	-275.157	-502.637
31.5	-930.163	-1039.93	-831.371	-984.506	-686.857	-329.146	-227.894	-299.834	-61.3143	-295.243
32	-933.206	-1055.81	-856.369	-1012.05	-689.837	-181.571	12.6829	-128.92	122.163	-82.8886
32.5	-938.397	-1064.3	-877.431	-1024.9	-704.52	-48.8714	233.686	37.1457	352.297	126.274
33	-930.717	-1065.93	-890.337	-1015.5	-693.386	73.4229	445.957	201.889	550.826	336.443
33.5	-902.06	-1060.08	-888.186	-994.971	-674.989	199.6	636.54	355.114	732.794	519.734
34	-878.071	-1055.14	-887.426	-965.56	-672.063	332.974	797.48	533.026	901.857	716.623
34.5	-835.78	-1001.17	-864.717	-939.331	-653.769	459.909	969.446	666.111	1078.82	893.32
35	-782.877	-951.489	-846.811	-901.877	-631.643	574.389	1143.2	790.326	1197.05	1042.8
35.5	-722.5	-894.434	-805.42	-848.7	-581.537	659.949	1253.87	912.997	1318.19	1157.13
36	-665.64	-841.406	-781.294	-806.506	-530.449	732.414	1329.39	1018.82	1361.99	1236.55
36.5	-601.146	-778.82	-727.094	-711.46	-486.491	808.709	1361.26	1091.38	1396.23	1285.61
37	-525.011	-690.911	-667.406	-621.891	-430.191	867.011	1394.57	1144.49	1413.25	1300.31
37.5	-431.626	-596.777	-587.397	-527.903	-352.457	873.214	1375.97	1173.77	1361.41	1307.59
38	-333.629	-502.037	-521.294	-413.937	-278.097	881.549	1324.14	1186.44	1283.74	1277.1
38.5	-227.52	-402.557	-431.697	-287.551	-194.457	847.829	1216.08	1156.62	1182.08	1237.58
39	-130.226	-249.837	-317.14	-157.426	-119.946	807.486	1111.77	1098.16	1046.05	1137.02
39.5	-37.2486	-90.2914	-188.56	-0.13143	-34.4886	766.534	1007.44	990.403	893.329	1053.72
40	74.5971	61.2971	-60.3171	117.229	39.2686	681.394	881.006	865.717	711.671	915.443
40.5	183.257	210.669	57.1257	241.083	128.531	592.429	729.497	749.3	511.283	783.78
41	273.566	344.251	167.669	369.98	217.066	500.986	571.689	579.183	304.511	608.331
41.5	361.223	475.391	307.023	485.717	302.757	370.057	402.377	394.551	81.3143	418.88
42	446.42	610.551	433.663	613.583	391.229	260.557	244.243	236.309	-140.974	224.434
42.5	526.069	701	538.52	720.637	482.82	137.471	45.3629	40.7114	-343.711	36.2171
43	635.829	801.231	628.837	834.197	575.88	5.73143	-156.417	-122.943	-553.58	-205.549
43.5	728.637	891.903	702.986	928.591	638.44	-120.966	-348.437	-295.183	-782.917	-407.703
44	800.957	973.56	805.563	997.754	686.354	-239.509	-525.414	-505.134	-978.377	-622.214
44.5	872.54	1059.39	886.491	1060.52	730.269	-331.889	-685.506	-674.209	-1148.65	-791.529
45	916.151	1144.03	942.18	1094.05	770.469	-445.229	-841.146	-816.337	-1301.45	-951.751
45.5	961.709	1174.7	1000.53	1141.7	779.477	-564.489	-1004.86	-950.334	-1423.35	-1118.91
46	999.751	1196.91	1024.56	1172.07	766.786	-661.546	-1115.36	-1065.82	-1535.72	-1250.29
46.5	1008.8	1203.71	1067.2	1167.08	741.926	-744.169	-1227.46	-1153.12	-1607.05	-1337.2
47	1002.39	1214.34	1075.54	1130.07	738.523	-811.343	-1315.73	-1206.06	-1611.65	-1391.87
47.5	969.64	1192.13	1044.36	1085.26	751.083	-873.306	-1362.43	-1234.24	-1618.4	-1434.32
48	942.509	1142.27	1019.01	1031.05	719.989	-964.011	-1389.58	-1262.68	-1616.1	-1478.91
48.5	890.549	1058.8	968.451	981.063	682.263	-965.891	-1395.36	-1261.88	-1556.13	-1477.64
49	808.3	969.217	885.411	863.703	630.666	-941.594	-1353.07	-1244.3	-1476.9	-1442.12
49.5	710.951	894.46	821.226	754.991	586.191	-939.957	-1283.41	-1170.2	-1363.32	-1389.04
50	620.237	790.449	711.177	627.92	532.351	-890.786	-1197.87	-1112.18	-1225.86	-1307.65
50.5	540.089	673.451	611.691	534.383	460.049	-832.52	-1094.89	-1039.56	-1084.03	-1229.47
51	460.317	540.686	516.649	434.751	369.983	-745.746	-992.2	-910.903	-893.917	-1070.31
51.5	362.031	415.969	407.734	329.943	296.329	-636.609	-841.78	-741.509	-659.289	-907.186
52	276.217	277.574	307.229	228.031	223.957	-548.3	-684.711	-593.571	-444.214	-717.966
52.5	199.331	186.783	207.014	148.606	161.329	-431.577	-506.549	-443.726	-214.92	-535.074
53	130.383	68.6971	98.6229	45.3514	80.7714	-293.694	-331.943	-281.029	34.2	-330.346
53.5	39.1457	-45.3886	-1.94857	-46.9371	-8.83714	-179.74	-139.166	-103.691	264.531	-114.029
54	-89.5371	-164.42	-95.1057	-145.611	-67.5114	-69.0057	52.0543	70.6657	489.763	128.211
54.5	-204.266	-259.991	-190.406	-243.866	-130.746	41.4286	246.643	222.554	707.949	319.634
55	-302.38	-363.969	-279.04	-342.123	-209.514	176.543	398.294	393.937	894.946	528.017
55.5	-402.697	-436.191	-363.103	-419.306	-286.129	312.091	572.737	530.503	1108.91	709.954
56	-486.709	-534.986	-442.894	-518.229	-344.86	401.926	721.534	677.769	1266.2	877.566
56.5	-579.557	-626.874	-517.574	-583.237	-379.057	520.446	872.697	789.46	1406.73	1057.32
57	-644.586	-697.411	-574.834	-647.097	-404.697	598.594	985.474	916.129	1502.89	1175.05
57.5	-679.157	-765.997	-614.057	-691.757	-448.131	701.191	1111.13	1022.33	1601.11	1290.33
58	-687.243	-817.383	-660.854	-710.951	-485.731	777.357	1230.91	1098.16	1651.37	1366.97
58.5	-698.323	-844.994	-688.1	-730.317	-498.369	827.143	1308.63	1137.52	1666.93	1427.49
59	-695.934	-866.151	-694.297	-754.369	-503.757	851.603	1374.64	1215.91	1634.1	1451.13
59.5	-697.814	-850.274	-694.997	-730.391	-505.514	882.477	1405.35	1241.47	1584.83	1480.64
60	-652.477	-811.663	-679.751	-705.103	-498.663	869.229	1413.6	1280.19	1553.91	1452.54
60.5	-622.574	-777.223	-668.077	-649.597	-488.677	891.126	1409.25	1242.98	1432.36	1457.43
61	-561.086	-732.489	-652.854	-605.371	-465.477	882.246	1379.17	1200.31	1346.28	1414.57
61.5	-549.103	-670.654	-622.203	-559.089	-433.917	847.071	1319.35	1126.76	1208.91	1333.03
62	-528.726	-605.237	-579.797	-490.677	-386.589	821.657	1248.55	1055.91	1089.39	1216.93
62.5	-475.369	-536.334	-555.026	-417.554	-352.809	775.054	1143.29	963.383	921.977	1085.55
63	-415.883	-482.42	-511.014	-347.757	-311.726	722.431	1046.37	870.469	776.277	944.703
63.5	-361.48	-416.986	-474.409	-286.949	-272.314	658.114	910.303	722.751	584.766	802.5
64	-297.071	-321.903	-407.394	-235.257	-224.377	589.994	782.294	618.557	421.64	632.254
64.5	-241.174	-221.651	-339.917	-154.683	-169.617	517.129	666.306	519.011	236.189	436.651
65	-157.12	-127.677	-271.137	-84.58	-118.391	453.317	500.543	404.929	52.2371	297.554
65.5	-56.6257	-18.9086	-203.711	-17.26	-73.2771	366.286	409.906	279.234	-120.509	138.349
66	18.0771	86.6829	-128.894	59.26	-5.92857	280.171	288.654	137.011	-288.117	5.96286
66.5	105.349	179.463	-50.8571	118.091	48.1314	193.486	179.266	18.6171	-471.529	-155.817
67	174.32	298.297	64.1086	197.549	101.151	139.871	74.6343	-88.5486	-633.58	-311.909
67.5	249.757	395.06	132.403	287.683	149.606	68.1943	-40.7229	-215.223	-736.563	-472.78
68	329.263	473.949	200.84	351.606	192.72	-13.4743	-178.349	-309.76	-864.443	-604.806
68.5	402.397	535.351	271.049	406.569	236.749	-94.0571	-287.949	-384.486	-948.091	-737.403
69	456.906	594.137	332.711	475.326	270.6	-174.594	-435.974	-454.103	-1038.93	-822.9
69.5	502.146	622.117	394.991	512.423	298.763	-206.331	-543.089	-508.937	-1071.87	-906.389
70	540.483	673.326	447.891	565.534	330.08	-243.774	-640.46	-575.38	-1071.02	-960.774
70.5	577.069	679.557	470.986	577.589	348.249	-296.423	-718.46	-599.303	-1067.55	-1007.16
71	607.909	693.86	511.111	611.403	364.774	-342.317	-776.466	-626.469	-1061.21	-1036.79
71.5	611.171	704.689	530.389	608.129	377.074	-382.274	-818.897	-671.774	-1047.78	-1038.3
72	555.026	649.369	533.697	593.503	373.117	-409.634	-851.017	-686.349	-1028.02	-1039.47
72.5	586.983	649.914	554.774	583.769	374.966	-401.589	-845.046	-718.163	-953.697	-1010.5
73	584.689	635.377	541.694	543.951	368.44	-419.323	-831.394	-720.494	-882.066	-971.903
73.5	600.031	621.491	538.611	498.454	355.474	-426.68	-797.954	-704.34	-824.42	-889.783
74	586.629	594.403	513.651	470.309	350.571	-412.76	-765.631	-694.426	-728.606	-775.806
74.5	584.98	548.774	490.709	429.703	335.926	-385.529	-687.446	-636.117	-609.84	-660.489
75	562.274	494.871	469.203	383.154	297.914	-354.086	-627.797	-565.911	-465.077	-537.049
75.5	555.937	460.254	456.394	315.82	280.311	-300.946	-532.677	-480.223	-323.717	-422.149
76	494.26	394.614	409.129	258.769	243.089	-255.643	-448.989	-391.511	-201.263	-309.066
76.5	425.169	292.74	367.877	211.617	197.614	-200.343	-376.929	-315.271	-61.8771	-192.637
77	337.023	196.266	321.323	164.271	175	-146.937	-298.977	-212.891	93.5629	-75.66
77.5	247.563	49.7171	265.443	57.1971	136.723	-112.82	-206.463	-125.22	216.897	1.32571
78	139.477	-77.2257	210.2	-75.5771	80.4886	-75.5371	-138.18	-50.8514	297.854	113.926
78.5	32.0486	-235.88	157.586	-210.3	61.9143	-32.8743	-61.5629	6.50857	394.877	244.246
79	-85.7343	-365.66	88.1229	-330.586	21.0371	9.96571	22.6257	62.2229	502.831	349.577
79.5	-191.331	-488.92	51.5229	-431.017	-0.35429	58.3629	101.003	135.397	575.443	431.777
80	-308.854	-622.446	15.8743	-579.289	-34.1886	71.0629	201.409	216.12	636.771	516.963
80.5	-387.909	-710.951	-36.68	-661.817	-82.9829	95.8971	248.623	224.246	694.317	552.769
81	-525.24	-821.734	-88.6429	-749.68	-126.82	137.04	285.797	248.497	732.829	610.474
81.5	-593.257	-865.969	-131.789	-765.56	-138.886	153.166	336.097	281.911	768.334	627.417
82	-714.88	-956.557	-170.54	-849.811	-187.723	178.086	377.243	323.14	774.386	609.634
82.5	-823.117	-1085.02	-208.32	-919.197	-242.543	209.78	397.191	334.917	754.963	604.426
83	-860.046	-1099.76	-256.051	-928.874	-265.677	191.943	388.711	363.477	762.014	593.96
83.5	-844.109	-1024.7	-269.071	-840.634	-279.231	204.557	373.503	371.42	721.551	554.129
84	-960.174	-1117.44	-295.363	-923.74	-330.694	199.589	365.743	413.091	686.429	555.423
84.5	-983.451	-1107.9	-304.029	-899.437	-372.723	215.249	363.754	439.771	617.091	516.791
85	-1033.74	-1125.65	-301.123	-890.434	-415.057	238.12	329.451	435.029	578.683	488.749
85.5	-1034.87	-1086.29	-327.171	-849.854	-444.717	222.831	307.66	388.034	536.294	440.494
86	-977.403	-956.7	-353.494	-735.426	-453.36	202.26	285.509	390.089	467.369	395.3
86.5	-929.891	-881.086	-332.254	-652.457	-462	202.857	288.286	314.966	385.88	369.803
87	-963.131	-899.134	-361.626	-672.057	-487.443	179.814	273.78	262.986	338.26	339.551
87.5	-874.677	-771.663	-361.88	-548.609	-470.209	158.366	241.68	270.829	229.369	269.429
88	-812.429	-710.226	-387.209	-519.011	-461	117.269	202.849	251.563	163.554	198.531
88.5	-679.951	-532.177	-384.843	-374.3	-436.331	61.2343	182.314	202.989	86.24	142.349
89	-601.44	-411.78	-381.011	-288.374	-421.054	35.7943	144.883	203.954	-14.5429	71.3686
89.5	-542.546	-363.886	-362.92	-230.669	-393.58	-19.3457	81.8143	168.66	-76.3371	21.0057
90	-517.983	-295.849	-362.317	-190.854	-366.297	-38.1257	14.6343	148.263	-122.814	-56.32
90.5	-472.706	-256.8	-382.854	-155.237	-366.066	-66.7571	-51.2114	117.934	-215.246	-118.894
91	-450.629	-220.406	-397.234	-118.5	-360.423	-65.1	-77.9571	31.9971	-248.969	-141.594
91.5	-230.963	56.9143	-330.2	100.22	-285.18	-89.7257	-91.0286	-19.4629	-249.034	-156.563
92	-90.8029	223.886	-296.071	163.863	-224.346	-66.6171	-131.649	-35.74	-257.3	-171.491
92.5	62.3943	362.151	-257.4	314.857	-172.086	-74.6314	-148.129	-66.0886	-279.663	-174.143
93	135.143	464.7	-229.277	365.929	-157.457	-86.4743	-143.151	-99.8114	-275.431	-153.563
93.5	284.586	659.629	-177.909	498.971	-90.4971	-87.3286	-173.726	-101.423	-289.671	-112.026
94	428.414	784.229	-117.586	597.334	-53.1514	-83.48	-154.746	-114.857	-269.24	-91.88
94.5	549.649	897.091	-89.6257	673.646	-16.0371	-99.06	-162.211	-107.2	-238.283	-82.12
95	661.994	1005.11	-17.9114	755.723	51.3371	-106.46	-179.371	-128.703	-226.463	-81.0229
95.5	665.031	954.331	-22.8657	775.509	50.2743	-141.231	-169.191	-140.546	-210.517	-84.2543
96	669.48	939.357	-29.2829	736.469	60.9257	-143.531	-176.089	-130.32	-154.649	-71.5743
96.5	829.914	1045.13	33.8571	834.914	137.717	-125.997	-164.683	-108.291	-110.711	-64.88
97	872.577	991.549	42.5657	805.974	126.62	-120.583	-118.491	-76.2514	-61.9629	-78.1057
97.5	899.517	1005.67	27.8543	834.626	155.457	-95.3686	-125.117	-61.1171	-15.3286	-52.3771
98	983.714	1072.53	105.983	867.183	219.734	-89.7571	-109.354	-25.4086	29.06	-40.7857
98.5	896.494	914.566	78.8486	755.886	195.877	-66.1543	-78.6829	14.0857	59.0314	-11.1771
99	913.723	898.886	126.734	734.586	242.351	-50.2457	-61.3429	37.8143	85.1743	37.5429
99.5	1022.38	1021.06	259.134	837.726	341.46	-35.3086	-32.06	36.9114	146.206	95.5486
100	995.411	989.337	263.16	794.606	369.431	-26.5514	-8.21429	24.38	199.034	87.3086
100.5	968.783	963.954	283.789	776.223	384.371	-34.2943	19.4286	21.7371	217.251	79.4486
101	955.74	927.083	308.806	736.957	415.234	-27.1486	51.4714	43.8314	235.326	82.2286
101.5	935.731	873.223	363.297	731.02	453.643	-29.9857	75.5229	31.9714	279.191	141.426
102	903.46	856.986	392.657	704.077	466.791	-9.68571	110.469	67.8229	302.24	201.649
102.5	840.263	795.889	377.163	668.394	467.249	8.20286	96.1514	97.2686	352.526	221.446
103	748.086	693.497	336.863	574.697	459.514	37.9257	125.449	147.714	369.891	239.58
103.5	683.211	625.986	354.523	513.48	448.729	43.0571	125.183	209.366	338.666	284.263
104	664.94	562.603	371.051	491.786	468.194	44.6	159.023	220.209	332.809	350.911
104.5	658.574	556.314	450.077	506.477	509.537	59.9971	199.18	252.163	367.194	384.951
105	580.4	452.806	392.023	422.629	468.546	81.8714	224.497	282.606	357.591	350.126
105.5	498.374	344.226	353.846	355.651	440.389	67.7829	224.909	278.949	346.869	294.969
106	465.04	296.269	364.651	291.597	437.343	78.62	261.369	312.031	316.803	295.577
106.5	397.297	209.934	362.874	246.397	405.471	68.0571	263.029	314.194	303.077	286.109
107	315.877	136.54	339.343	189.677	389.331	101.12	290.377	286.98	287.323	301.543
107.5	233.926	100.74	330.049	152.517	387.06	133.617	270.243	298.894	299.689	299.409
108	125.371	10.4943	260.8	78.9657	345.903	131.206	241.074	300.834	270.403	311.071
108.5	52.5914	-42.6257	247.326	51.8486	318.029	132.743	219.957	301.071	231.946	346.72
109	45.4086	-22.9229	254.194	36.2086	334.054	164.82	247.909	293.777	223.226	377.583
109.5	-0.57143	-48.2143	245.603	39.2371	313.977	166.531	260.394	264.297	195.357	362.08
110	-39.3943	-98.0886	222.78	4.26571	261.134	187.303	252.346	265.534	172.72	362.449
110.5	-75.4629	-142.234	224.96	-10.2029	219.631	162.651	243.537	268.254	172.477	341.709
111	-118.023	-161.394	189.703	-51.9943	178.157	177.894	213.463	249.994	138.531	304.88
111.5	-117.98	-162.574	195.186	-84.9429	144.671	162	209.88	224.563	107.091	262.774
112	-142.64	-168.989	188.009	-109.417	123.629	175.134	216.714	184.166	95.8571	209.177
112.5	-185.769	-194.823	162.843	-138.3	75.8	156.043	164.271	168.374	58.66	179.48
113	-196.803	-213.486	158.68	-162.314	37.8086	144.234	143.651	149.857	28.8429	152.566
113.5	-228.537	-221.949	128.486	-198.709	27.38	118.729	124.854	122.409	22.9086	89.34
114	-241.829	-209.183	79.78	-211.526	0.274286	114.18	91.6257	107.14	-4.46	68.7371
114.5	-253.234	-220.606	68.7971	-213.649	-17.1429	85.2314	96.2629	73.24	-26.9543	41.3714
115	-281.557	-246.463	17.9629	-228.766	-48.3771	93.5543	85.9829	27.9629	-48.9543	39.24
115.5	-271.811	-224.991	16.0686	-224.557	-61.1857	69.7829	66.4829	42.7114	-46.1771	27.62
116	-260.797	-199.38	11.6686	-206.24	-70.7171	57.1857	59.7514	25.7171	-45.6257	-8.26857
116.5	-267.154	-192.306	-14.0171	-207.643	-83.2714	51.6543	52.3657	7.4	-23.3629	-12.4257
117	-263.851	-178.326	-25.6114	-196.251	-87.9829	60.9343	38.8114	-25.3971	-36.3886	-24.1314
117.5	-253.894	-166.166	-13.1257	-194.206	-79.1457	48.7714	46.5143	-37.26	-13.9429	-47.8886
118	-238.794	-138.706	-6.06571	-190.483	-82.84	42.2343	40.0229	5.54857	23.5143	-62.2743
118.5	-234.534	-108.086	13.94	-166.997	-76.6486	29.5543	48.5829	40.9	57.9971	-92.2
119	-238.377	-106.923	-2.65143	-168.657	-84.6571	34.7686	31.84	40.8314	87.4029	-75.4629
119.5	-229.894	-116.857	1.65714	-165.949	-90.98	62.6857	22.28	10.98	124.64	-57.4457
120	-227.026	-100.709	5.05429	-165.423	-87.1029	74.38	22.8571	21.5143	156.043	-54.5543
120.5	-210.186	-88.4571	-10.3143	-155.486	-74.6029	74.7714	3.04857	63.0314	205.829	-40.5086
121	-202.26	-101.674	-19.3886	-145.131	-81.1086	98.0629	3.89714	61.3657	234.374	-9.04286
121.5	-202.918	-131.122	-40.8367	-145.082	-96.9796	79.7755	-30.5306	10.9592	231.163	-7.55102
122	-193.304	-158.024	-51.4643	-162.946	-114.321	65.4613	-79.1875	-24.5357	221.336	22.375
122.5	-182.942	-185.517	-81.7264	-168.459	-123.574	51.1702	-97.3891	-63.5137	191.389	-6.24012
123	-195.14	-207.801	-114.196	-181.339	-140.984	9.40373	-101.46	-59.4845	176.72	-38.7702
123.5	-186.508	-234.194	-137.676	-179.035	-152.076	-4.69524	-108.333	-89.454	163.756	-41.9714
124	-193.932	-245.448	-127.065	-179.75	-178.49	-22.7857	-120.143	-107.442	118.546	-45.7857
124.5	-188.432	-245.286	-133.173	-200.286	-195.532	-46.8239	-143.957	-158.94	64.9568	-88.495
125	-198.786	-264.071	-163.905	-215.095	-220.857	-59.9762	-138.857	-185.333	5.11905	-123.952
125.5	-202.111	-267.624	-199.035	-222.352	-237.157	-77.6063	-145.679	-199.077	-21.2334	-178.206
126	-210.004	-283.786	-206.332	-236.671	-255.807	-100.761	-164.854	-223.611	-88.7893	-202.568
126.5	-203.993	-286.842	-218.912	-252.223	-265.161	-136.432	-201.923	-227.029	-144.484	-227.861
127	-210.515	-297.278	-234.274	-267.316	-276.365	-176.15	-236.496	-235.929	-234.553	-255.793
127.5	-219.726	-318.405	-264.081	-277.39	-284.44	-191.676	-245.425	-271.954	-308.413	-277.575
128	-225.222	-330.167	-300.266	-269.782	-292.841	-220.103	-266.635	-298.282	-372.333	-286.389
128.5	-237.686	-330.971	-321.114	-275.4	-281.171	-232.086	-313.543	-309.171	-462.886	-298.6
129	-244.786	-355.609	-330.387	-284.676	-287.303	-246.597	-340.899	-369.555	-602.483	-357.252
129.5	-258.675	-350.554	-355.628	-283.948	-285.139	-235.779	-372.022	-399.619	-675.506	-402.905
130	-264.232	-354.875	-379.996	-274.281	-288.96	-226.871	-371.348	-468.915	-757.879	-442.022
130.5	-264.82	-347.806	-398.848	-283.005	-289.608	-243.194	-381.512	-515.332	-842.244	-515.788
131	-255.524	-344.495	-414.429	-292.51	-290.071	-300.519	-409.729	-580.543	-930.895	-593.671
131.5	-257.857	-343.783	-416.419	-301.744	-292.108	-309.251	-410.616	-579.493	-1013.76	-691.936
132	-253.679	-343.893	-414.107	-314.25	-299	-348.643	-428.25	-610	-1055.21	-777.107
132.5	-253.259	-323.796	-419.315	-306.148	-286.648	-356.481	-414.796	-595.833	-1044	-787.241
133	-238.877	-310.638	-403.462	-301.877	-280.438	-400.769	-391.938	-594.085	-1054.52	-811.146
133.5	-231.38	-295.91	-387.77	-306.37	-264.51	-423.28	-406.47	-576.68	-1095.16	-843.1
134	-180.821	-259.857	-163.5	-89.3929	-266.393	-66.6429	-62.1071	-77	-62.9643	-51.1429
134.5	-188.963	-265.889	-164.944	-93.7037	-275.056	-61.7222	-59	-75.537	-64.7407	-50.2407
135	-188.715	-265.646	-160.123	-88.4462	-272.915	-56.5308	-57.4692	-81.6231	-69.6923	-38.9
135.5	-197.78	-262.34	-149.93	-98.63	-279.55	-68.51	-61.15	-86.49	-71.48	-37.79

## Sheet: NLS-mNG-CK1_3
Time (h)	NLS_PBS_1	NLS_PBS_2	NLS_PBS_3	NLS_DOX_1	NLS_DOX_2	NLS_DOX_3
0	-95.5962	47.5962	61.4038	-185.962	-175.385	-335.615
0.5	-134.963	21.963	43.637	-229.711	-199.415	-349.881
1	-172.083	-9.25	16.9167	-293.286	-231.607	-396.619
1.5	-209.049	-62.2857	-17.4089	-350.187	-264.355	-438.261
2	-244.91	-98.6286	-54.5857	-406.505	-303.805	-467.871
2.5	-311.76	-158.82	-106.387	-479.212	-359.77	-514.963
3	-367.254	-214.844	-158.179	-535.509	-410.362	-559.263
3.5	-434.303	-291.377	-206.091	-586.537	-446.597	-607.853
4	-487.609	-333.916	-264.95	-628.218	-488.349	-665.769
4.5	-556	-380.886	-309.371	-641.571	-518.029	-694.4
5	-599.385	-385.397	-341.81	-645.639	-519.659	-712.02
5.5	-626.525	-386.309	-359.788	-632.992	-499.726	-699.29
6	-622.32	-363.951	-369.989	-586.361	-471.32	-675.117
6.5	-603.234	-346.564	-358.278	-523.678	-403.985	-610.934
7	-551.257	-309.857	-331.446	-458.704	-334.746	-533.004
7.5	-496.958	-272.725	-277.397	-364.986	-239.233	-432.774
8	-404.833	-203.333	-201.69	-236.714	-133.857	-289.333
8.5	-317.372	-138.568	-123.704	-119.824	-38.0199	-123.827
9	-216.38	-62.5325	-33.2695	7.3474	76.2955	36.6234
9.5	-132.879	8.6127	53.0635	130.689	196.378	213.095
10	-37.6491	102.326	131.773	245.609	280.64	360.559
10.5	59.4225	185.9	198.815	364.009	379.815	491.882
11	151.452	257.905	241.589	478.533	459.964	623.003
11.5	242.714	313.755	261.082	558.796	519.306	707.51
12	323.786	359.44	269.766	631.64	553.506	756.48
12.5	366.389	393.469	253.643	667.177	560.16	760.937
13	416.103	420.82	240.191	681.12	532.094	709.746
13.5	432.623	414.977	213.666	667.286	520.523	631.166
14	415.526	402.529	175.937	609.346	459.92	512.709
14.5	387.026	376.109	130.134	512.969	388.434	374.611
15	337.391	323.76	88.3486	387.309	292.266	189.483
15.5	288.714	248.749	41.3	248.034	178.28	-31.2
16	226.011	152.049	3.84571	90.1143	53.3571	-253.36
16.5	142.671	35.8143	-57.4029	-82.8114	-76.88	-487.046
17	48.1343	-73.2771	-118.98	-272.406	-225.806	-722.603
17.5	-37.1771	-188.826	-170.951	-451.023	-375.423	-939.937
18	-124.169	-289.729	-220.949	-630.109	-526.683	-1176.86
18.5	-232.991	-368.114	-270.22	-811.88	-660.631	-1402.42
19	-353.809	-447.923	-329.086	-983.077	-777.891	-1606.38
19.5	-461.866	-513.197	-397.534	-1140.93	-884.803	-1784.57
20	-566.214	-576.771	-450.237	-1279.12	-978.211	-1921.79
20.5	-643.051	-621.186	-519.303	-1389.39	-1065.6	-2001.76
21	-727.5	-663.089	-582.109	-1481.14	-1146.24	-2069.57
21.5	-820.294	-704.706	-647.771	-1561.64	-1208.66	-2108.99
22	-874.611	-728.314	-692.874	-1597.91	-1249.96	-2121.66
22.5	-889.266	-733.711	-735.246	-1614.23	-1253.52	-2082.41
23	-904.914	-743.097	-756.049	-1593.85	-1238.39	-2010.14
23.5	-906.654	-744.663	-771.003	-1531.45	-1189.85	-1876.75
24	-903.326	-726.694	-751.569	-1444.28	-1113.76	-1685.11
24.5	-892.817	-725.911	-734.151	-1327.26	-1015.27	-1440.11
25	-839.74	-702.789	-699.869	-1184.38	-883.654	-1147.51
25.5	-785.209	-706.917	-683.534	-1014.87	-753.12	-827.7
26	-746.526	-691.509	-636.84	-802.463	-596.846	-513.557
26.5	-668.606	-668.517	-576.591	-579.531	-424.326	-208.517
27	-599.54	-641.254	-511.931	-385.857	-244.531	117.977
27.5	-490.28	-621.574	-442.726	-150.403	-57.1543	431.403
28	-376.057	-550.466	-373.417	121.237	162.78	671.674
28.5	-253.111	-500.046	-293.803	398.729	350.286	947.366
29	-118.797	-418.937	-190.566	680.986	566.574	1234.57
29.5	21.4571	-339.06	-83.3943	937.02	732.803	1602.19
30	147.783	-275.5	16.54	1176.93	878.549	1992.82
30.5	283.6	-170.92	113.757	1422.84	990.474	2267.2
31	437.96	-47.3457	210.357	1609.03	1097.87	2392.47
31.5	588.34	70.02	320.806	1732.59	1151.51	2348.29
32	716.214	174.823	436.217	1837.46	1253.19	2340.45
32.5	839.994	280.663	542.743	1907.38	1291.38	2275.57
33	960.96	378.389	642.189	1952.6	1332.88	2145.35
33.5	1081.25	499.551	742.049	1935.13	1343.71	1957.19
34	1172.01	631.463	805.86	1867.98	1338.28	1797.23
34.5	1212.13	752.309	873.877	1766.35	1290.7	1767.29
35	1248.4	841.111	925.646	1612.6	1220.81	1856.07
35.5	1316.81	953.497	985.217	1421.82	1072.86	1806.4
36	1335.46	1065.27	1034.25	1188.51	908.497	1772.25
36.5	1296.46	1153.84	1038.78	924.114	683.291	1596.24
37	1233.03	1249.27	1039.46	701.486	495.589	1404.54
37.5	1151.58	1285.41	1056.87	470.917	306.72	1168.84
38	1112.88	1309.37	1074.67	269.551	145.894	904.917
38.5	1076.14	1332.6	1062.1	100.589	-7.44571	671.269
39	947.183	1316.94	1019.1	-85.28	-114.886	482.823
39.5	811.623	1280.51	936.334	-274.434	-183.554	255.269
40	772.446	1234.93	864.103	-464.149	-217.229	126.234
40.5	748.977	1149.91	784.763	-661.38	-237.26	-20.2829
41	749.86	1094.74	699	-811.903	-267.991	-133.911
41.5	711.983	999.094	601.783	-929.617	-251.366	-232.263
42	628.186	911.789	523.526	-1015.32	-277.029	-320.477
42.5	583.091	840.04	432.457	-1047.89	-307.263	-421.169
43	560.997	746.063	356.531	-1058.52	-340.431	-507.511
43.5	484.02	656.903	280.04	-987.323	-356.431	-573.883
44	385.649	582.551	229.629	-909.251	-372.383	-573.543
44.5	272.229	473.783	151.874	-814.197	-357.491	-571.337
45	124.88	372.731	93.0714	-763.629	-375.237	-565.626
45.5	23.7743	255.911	17.2086	-675.98	-354.16	-594.629
46	-88.22	138.32	-59.4257	-549.589	-291.537	-594.703
46.5	-215.317	34.6971	-128.191	-412.043	-216.531	-577.88
47	-271.431	-38.6429	-141.934	-238.129	-135.106	-531.669
47.5	-342.029	-146.72	-189.08	-82.7514	-68.4143	-467.086
48	-413.991	-222.857	-226.303	69.0514	-2.71143	-400.577
48.5	-451.211	-292.691	-266.191	250.151	43.7171	-290.337
49	-499.08	-348.254	-300.189	374.86	111.446	-192.937
49.5	-522.64	-399.42	-319.723	489.549	169.857	-74.2829
50	-511.563	-431.483	-300.411	600.151	218.457	62.1571
50.5	-585.32	-485.211	-349.734	676.366	241.029	153.749
51	-616.926	-509.549	-373.566	745.169	273.494	197.523
51.5	-641.603	-543.569	-376.463	818.851	305.46	284.109
52	-627.334	-542.863	-374.109	893.117	344.234	313.491
52.5	-610.674	-543.917	-357.743	963.82	396.351	365.774
53	-572.777	-535.086	-323.694	1005.8	406.06	386.534
53.5	-564.877	-538.443	-329.883	1037.44	394.771	417.263
54	-505.943	-525.131	-318.357	1040.17	407.803	439.926
54.5	-442.411	-518.869	-303.423	1031.18	401.517	460.757
55	-383.071	-481.18	-276.763	970.42	386.02	437.151
55.5	-326.589	-472.78	-264.537	920.68	385.82	419.206
56	-256.717	-434.609	-250.263	827.04	336.014	356.857
56.5	-209.994	-416.834	-235.02	733.391	297.066	312.971
57	-115.106	-362.634	-208.334	627.769	266.411	239.166
57.5	-62.0114	-324.229	-168.866	484.797	225.574	175.237
58	-8.18857	-270.834	-144.186	376.043	210.566	99.9943
58.5	43.8743	-212.931	-106.214	268.226	179.337	28.2743
59	104.383	-163.434	-65.1343	148.754	134.486	-44.8743
59.5	146.426	-123.46	-28.4029	68.7429	97.44	-106.609
60	185.214	-72.2571	-4.54857	-19.3829	51.78	-160.026
60.5	210.563	-23.6629	27.6771	-97.12	10.2857	-222.597
61	248.471	32.6886	60.7343	-161.409	-37.8657	-278.726
61.5	271.843	73.5314	79.5857	-221.609	-106.64	-310.863
62	318.56	100.889	91.7714	-265.674	-149.183	-352.263
62.5	335.711	142.657	106.414	-335.809	-200.88	-388.154
63	340.806	179.586	124.143	-388.363	-226.346	-412.586
63.5	349.857	219.357	155.849	-430.56	-221.666	-421.494
64	332.111	235.78	165.617	-468.814	-238.457	-417.1
64.5	335.163	233.154	174.686	-480.349	-237.737	-417.723
65	323.211	238.054	204.126	-495.403	-223.22	-433.737
65.5	297.897	246.229	204.963	-492.183	-232.563	-420.814
66	257.734	250.571	214.451	-479.697	-215.029	-399.671
66.5	256.48	252.423	209.843	-463.731	-215.251	-360.269
67	244.077	232.529	192.657	-429.906	-207.686	-338.254
67.5	223.757	223.451	189.934	-398.537	-173.374	-317.609
68	184.117	216.071	183.514	-351.009	-157.183	-283.006
68.5	156.697	203.711	166.914	-324.111	-133.034	-204.966
69	123.874	181.543	148.151	-276.38	-81.7457	-132.851
69.5	109.674	156.583	124.677	-224.551	-67.14	-84.0171
70	51.6629	123.791	113.577	-169.609	-38.9	-33.8657
70.5	3.1	117.491	103.22	-138.82	-27.6971	20.3629
71	-23.3657	78.8771	89.9914	-100.563	-15.1943	84.46
71.5	-44.6371	49.9371	58.9914	-91.1143	10.8686	139.057
72	-49.2371	28.1743	44.2543	-47.5086	33.3114	165.266
72.5	-80.5257	14.74	49.3514	-33.4857	45.2686	191.977
73	-116.84	0.317143	45.0371	-7.12	79.7029	246.974
73.5	-112.946	-15.54	19.9829	6.26571	109.103	274.129
74	-121.137	-55.6971	1.12	31.1486	126.831	295.174
74.5	-124.417	-66.6343	-20.3657	55.5514	139.357	306.034
75	-134.986	-76.2314	-28.0914	83.9543	153.803	329.814
75.5	-160.317	-97.7571	-41.6714	84.3314	165.786	345.3
76	-165.763	-107.443	-72.86	93.6114	147.609	335.151
76.5	-157.34	-126.737	-90.1057	107.491	138.429	328.009
77	-166.549	-138.283	-99.4857	107.563	131.169	325.049
77.5	-147.971	-128.809	-110.117	113.249	135.949	306.917
78	-161.886	-126.514	-117.551	124.954	133.789	319.797
78.5	-162.126	-132.709	-117.123	124.157	113.5	296.28
79	-154.709	-114.057	-123.771	133.594	90.7486	249.597
79.5	-148.829	-115.951	-128.814	128.934	88.3971	222.991
80	-129.666	-114.537	-130.997	119.26	75.8514	180.46
80.5	-130.174	-113.849	-120.831	99.4057	61.5971	129.531
81	-137.843	-107.609	-113.806	72.9371	54.02	103.557
81.5	-117.943	-105.514	-119.903	37.26	38.3886	54.0857
82	-104.28	-98.9886	-113.711	27.0914	38.6171	15.8743
82.5	-87.7457	-105.394	-114.934	-5.42	40.1114	-3.43429
83	-59.5029	-100.834	-94.4914	-25.7771	4.15143	-33.8629
83.5	-50.0486	-84.8829	-92.8314	-62.4229	4.76286	-49.8429
84	-25.8143	-71.6286	-91.4257	-75.5457	-14.3943	-80.7371
84.5	-14.6857	-68.8943	-87.8114	-80.0029	-41.88	-98.5771
85	5.02571	-57.84	-73.6086	-103.309	-55.72	-132.983
85.5	20.4057	-38.6857	-81.5	-95.5029	-74.9086	-143.223
86	37.0914	-35.2571	-68.4257	-100.011	-113.309	-168.206
86.5	39.08	-28.1371	-65.98	-104.849	-87.68	-179.854
87	42.1657	-29.2514	-51.1714	-92.6771	-99.8314	-193.686
87.5	48.4714	-17.5686	-44.4571	-95.0657	-102.563	-185.9
88	61.2857	-14.2714	-39.5857	-97.7857	-119.991	-188.589
88.5	63.7286	-1.61429	-24.9971	-91.8857	-131.863	-183.166
89	67.3429	3.25714	0.774286	-112.503	-129.149	-177.954
89.5	57.5257	15.6657	1.94	-103.106	-116.72	-158.809
90	49.6143	25.4257	-1.74	-92.3857	-128.866	-136.083
90.5	32.2	29.5314	-0.98	-94.1029	-137.08	-122.014
91	20.5686	27.8571	3.10286	-73.9829	-128.014	-86.3514
91.5	9.47429	24.8571	13.7486	-49.3914	-114.489	-71
92	-3.04857	12.0429	14.6629	-6.94857	-104.209	-57.2914
92.5	-13.5343	-0.56286	7.95429	20.8057	-101.38	-31.8314
93	-21.7829	-5.76	16.4571	32.5457	-87.4971	-21.7771
93.5	-24.4829	-18.0086	27.8743	63.8086	-73.7429	-1.02857
94	-11.3143	-16.0057	30.9971	84.9971	-40.0114	4.95714
94.5	-20.6857	-28.0914	33.36	95.0971	-17.62	-4.82571
95	-28.9943	-30.2657	30.0943	97.9257	16.8114	-0.63714
95.5	-28.4429	-18.0429	24.5629	110.574	36.3686	11.9771
96	-33.8457	-15.5686	25.5229	101.469	62.1286	12.1829
96.5	-35.2829	-16.48	28.6543	113.749	78.1486	20.8086
97	-25.7114	-9.20286	20.8029	99.9171	95.3229	19.3629
97.5	-41.7914	-13.5857	30.8886	94.8057	94.2743	37.3629
98	-35.5086	-8.40571	26.2	99.3543	79.68	42.5029
98.5	-35.2571	3.63429	22.2971	106.077	84.0543	41.7114
99	-43.3171	-4.48286	21.1914	90.8057	102.037	44.5514
99.5	-41.2686	-6.85429	8.96286	80.4457	89.5	40.2114
100	-46.1	-0.05714	-3.63143	84.26	87.1371	33.98
100.5	-54.1457	-2.72571	1.28857	94.9571	78.2571	8.47429
101	-46.7914	-1.06857	-19.4314	113.483	77.8771	10.58
101.5	-51.7143	-3.44	-20.0171	114.703	77.1914	11.7571
102	-51.96	-8.32571	-18.1971	100.377	65.9829	5.57429
102.5	-44.2714	-12.1886	-17.8457	86.8514	43.0629	13.9914
103	-45.4571	-11.8429	-9.01429	107.843	39.1229	19.8514
103.5	-39.7114	-14.8029	-15.4743	100.529	27.0857	25.5343
104	-41.3286	-10.3857	-15.92	93.5686	19.68	28.2857
104.5	-45.7514	-6.54857	-11.4057	68.4429	5.66	24.8886
105	-45.0886	-1.51143	-17.3543	63.62	4.62857	6.3
105.5	-41.8229	-7.26	-15.8457	65.0114	-11.5286	0.314286
106	-47.4114	-7.31143	-13.8086	55.5714	-18.9286	-30.6943
106.5	-50.0429	-10.0571	-18.9171	41.6086	-18.5886	-46.4371
107	-55.0314	-12.24	-6.05143	38.72	-21.2886	-50.7143
107.5	-52.4686	-14.5771	-6.99714	17.0114	-30.2343	-51.4914
108	-46.8457	-19.1086	-7.24	7.12857	-23.1543	-81.3257
108.5	-38.4286	-25.1457	-9.17143	-11.7914	-39.34	-77.4943
109	-37.8886	-19.6257	-16.7771	-14.5171	-41.9914	-77.36
109.5	-29.1743	-17.8971	-27.2943	-27.1086	-44.3371	-69.2857
110	-18.1143	-15.1343	-33.1943	-26.7	-55.3343	-75.3857
110.5	-10.4343	-17.1257	-36.4743	-45.1143	-56.1714	-79.64
111	-3.29143	-13.0114	-47.9629	-43.8571	-53.54	-75.5457
111.5	-4.95143	-13.8571	-50.1429	-28.0629	-61.0743	-73.1143
112	-12.0857	-11.9714	-43.9	-32.8514	-56.2286	-75.7286
112.5	-6.64571	-9.09143	-47.3	-24.9143	-52.0629	-58.4971
113	-2.22	-7.38286	-42.4857	10.4629	-45.04	-51.84
113.5	5.52571	-5.60286	-36.3	1.49143	-31.3714	-31.3657
114	13.44	-11.5543	-41.5857	8.65143	-26.2971	-34.2571
114.5	16.6314	-13.2229	-37.6143	8.31714	-14.6514	-31.3771
115	18.9086	-3.63143	-36.2371	-6.02571	-13.0971	-2.28
115.5	38.4829	-0.38857	-33.3257	5.12857	-9.25429	11.4057
116	42.38	-0.81714	-28.1086	-1.7	-4.02	22.8543
116.5	34.68	0.828571	-26.56	-24.4114	5.58	31.98
117	36.7257	2.34857	-21.1171	-19.46	3.94571	44.9543
117.5	32.1286	11.1057	-17.7657	-13.1857	12.96	53.2571
118	27.4286	6.88286	-22.6314	-4.27143	11.6314	71.1743
118.5	34.0514	3.50571	-21.0057	9.78571	22.9829	75.4543
119	22.2086	1.08	-25.6371	15.4686	37.1543	84.8286
119.5	18.0571	-6.63143	-22.9143	30.88	42.7429	80.5143
120	25.1	-6.52	-21.64	38.0029	39.5114	76.0486
120.5	6.72571	-4.84857	-27.9114	49.2886	36.8343	69.5086
121	0.77551	-0.83673	-25.5918	39.1633	25.1633	70.2041
121.5	-0.88095	1.99702	-15.2292	32.6458	15.8274	53.3631
122	-9.1155	2.58055	-7.73252	42.9027	8.20973	37.2006
122.5	-14.5311	1.44721	1.14907	35.7174	4.34472	15.4348
123	-20.9016	2.60317	6.11746	18.3651	4.55238	-2.04444
123.5	-30.2078	4.93831	14.5357	10.0487	-7.87987	-14.7792
124	-29.5382	-2.56811	19.4186	-18.7907	-29.9502	-32.9136
124.5	-28.1667	-13	23.2857	-22.7619	-33.2381	-58.5238
125	-33.9199	-17.446	20.338	-37.547	-45.1812	-72.5749
125.5	-44.4893	-29.9643	12.7321	-78.7464	-52.5286	-89.5143
126	-50.7509	-31.5238	7.68498	-94.7289	-77.1062	-105.579
126.5	-53.3759	-35.6203	2.99248	-123.053	-95.2143	-110.049
127	-59.749	-40.8031	5.59073	-143.108	-103.375	-110.517
127.5	-60.7937	-38.119	3.94444	-157.738	-93.6587	-127.563
128	-65.1143	-45.3143	-1.51429	-199.571	-104.429	-132.4
128.5	-67.5882	-41.3866	6.71429	-233.076	-106.185	-156.786
129	-61.8009	-35.3636	5.91342	-263.156	-120.719	-171.749
129.5	-54.4152	-32.6607	5.39732	-297.384	-122.536	-171.938
130	-55.1382	-30.2627	-5.43318	-326.069	-131.885	-186.484
130.5	-48.8381	-32.4333	-21.2619	-341.224	-135.61	-206.567
131	-47.4483	-38.0985	-29.1626	-364.094	-140.005	-207.778
131.5	-53.7857	-34.8929	-27.9643	-365.286	-137.536	-224.25
132	-50.6852	-39.2963	-40.537	-365.556	-135.722	-213.204
132.5	-51.5615	-40.3692	-44.3692	-361.223	-128.585	-206.831
133	-57.61	-47.39	-52.66	-357.37	-125.34	-216.54
133.5	-231.38	-295.91	-387.77	-306.37	-264.51	-423.28
134	-180.821	-259.857	-163.5	-89.3929	-266.393	-66.6429
134.5	-188.963	-265.889	-164.944	-93.7037	-275.056	-61.7222
135	-188.715	-265.646	-160.123	-88.4462	-272.915	-56.5308
135.5	-197.78	-262.34	-149.93	-98.63	-279.55	-68.51
