# Supplementary material for: Nuclear CK1δ as a critical determinant of PER:CRY complex dynamics and circadian period
Source: eLife. 2026 Jun 15;15:RP110786. doi: 10.7554/eLife.110786 (PMC13268647; doi:10.7554/eLife.110786)
Supplement: Figure 7—source data 6. [file elife-110786-fig7-data6.xlsx]

## Sheet: NES-mNG-CK1_1
Time (h)	NES_PBS_1	NES_PBS_2	NES_PBS_3	NES_PBS_4	NES_PBS_5	NES_DOX_1	NES_DOX_2	NES_DOX_3	NES_DOX_4	NES_DOX_5
0	3.90385	-27.7885	104.942	-63.8077	-121.942	-49.8077	-165.135	-48.5385	-88.8654	-39.7308
0.5	7.17778	-22.3481	104.059	-70.0519	-135.037	-56.4222	-172.659	-69.8519	-91.4519	-20.9852
1	-4.79762	-25.2976	88.0238	-84.7143	-158.607	-76.8214	-190.405	-96.4881	-104.488	-24.5238
1.5	-27.2562	-47.9901	69.6404	-119.291	-192.453	-108.931	-215.507	-134.488	-134.921	-48.8867
2	-45.3524	-56.2286	47.5762	-127.71	-212.567	-135.257	-227.705	-166.5	-144.924	-52.519
2.5	-73.9447	-109.636	14.0138	-167.392	-259.041	-191.456	-258.143	-222.571	-175.028	-87.1705
3	-121.487	-165.714	-30.0625	-212.067	-298.629	-261.853	-315.973	-320.147	-224.295	-141.107
3.5	-192.143	-232.113	-95.7706	-279.411	-370.242	-352.186	-393.026	-424.442	-306.68	-210.563
4	-280.273	-317.164	-190.87	-361.508	-442.937	-460.571	-484.487	-545.004	-396.239	-311.592
4.5	-378.857	-427.8	-284.714	-455.286	-522.2	-578.143	-586.514	-685.229	-490.229	-419.486
5	-474.337	-538.948	-395.603	-545.198	-606.444	-692.659	-697.405	-814.286	-584.448	-528.214
5.5	-573.015	-638.151	-489.714	-643.382	-688.865	-792.776	-785.344	-918.436	-670.089	-636.629
6	-664.511	-719.323	-585.598	-714.429	-753.47	-868.226	-873.801	-1023.28	-751.071	-732.782
6.5	-745.531	-795.282	-677.755	-778.711	-828.194	-930.799	-930.978	-1099.32	-824.553	-823.784
7	-804.014	-858.321	-753.029	-841.114	-878.85	-993.496	-977.307	-1172.21	-872.386	-894.314
7.5	-856.446	-905.857	-796.167	-889.422	-919.31	-1026.84	-1008.67	-1201.95	-902.645	-957.436
8	-880.857	-936.905	-828.405	-903.786	-943.786	-1044.29	-1002.12	-1214.86	-921.119	-1001.31
8.5	-902.834	-935.385	-846.701	-911.116	-955.877	-1033.93	-984.465	-1223.83	-917.857	-1013.12
9	-893.906	-923.99	-860.711	-889.146	-943.873	-999.961	-949.555	-1198.31	-899.097	-1006.85
9.5	-865.533	-892.514	-842.867	-863.273	-913.057	-961.854	-886.952	-1145.31	-850.613	-984.565
10	-830.146	-845.696	-820.661	-816.55	-856.494	-893.23	-809.429	-1076.41	-783.062	-924.23
10.5	-771.398	-777.043	-771.474	-743.924	-785.122	-795.714	-705.106	-963.182	-692.258	-853.119
11	-702.217	-694.929	-725.417	-645.071	-700.313	-677.116	-584.872	-839.381	-597.027	-756.842
11.5	-609.184	-592.265	-660.49	-534.184	-583.449	-555.816	-454.082	-691.694	-487.429	-646.184
12	-504.414	-476.874	-559.663	-411.311	-444.114	-404.82	-302.629	-509.889	-367.64	-532.883
12.5	-406.491	-375.223	-453.54	-310.166	-323.214	-279.986	-178.626	-378.74	-232.209	-424.483
13	-307.911	-259.123	-362.443	-188.371	-184.674	-147.909	-50.0314	-206	-120.123	-297.569
13.5	-205.691	-118.746	-242.586	-75.8114	-52.2	-5.46286	72.6743	-28.34	4.00857	-168.297
14	-93.3914	3.01714	-104.751	63.9686	99.0343	136.64	191.497	145.569	122.746	-40.7543
14.5	37.72	140.157	35.5971	183.251	248.371	273.129	345.877	322.077	265.703	102.409
15	154.891	269.663	180.571	307.12	391.383	430.971	469.611	508.429	402.866	253.726
15.5	270.797	399.969	303.643	427.117	515.697	564.02	606.591	694.469	528.94	406.64
16	376.157	516.314	421.537	548.503	644.003	690.12	731.397	884.631	625.691	529.303
16.5	478.694	633.674	544.523	656.534	745.057	841.623	856.78	1019.81	747.22	637.089
17	595.76	733.351	644.857	764.314	850.849	939.009	983.06	1167.99	857.506	757.869
17.5	691.554	831.9	723.991	846.617	936.883	1026.12	1071.55	1278.03	954.783	879.189
18	779.934	908.694	797.757	928.306	996.449	1110.57	1133.8	1386.03	1015.54	966.037
18.5	837.334	976.649	857.897	985.1	1032.36	1164.42	1182.39	1447.31	1068.6	1036.34
19	912.446	1034.59	910.606	1022.11	1086.33	1209.27	1188.77	1477.45	1121.11	1109.28
19.5	959.871	1055.3	944.3	1055.95	1098.07	1214.93	1204.45	1473.65	1144.7	1160.97
20	982.451	1056.08	956.906	1062.5	1107.09	1182.29	1179.15	1457.98	1136.34	1202.28
20.5	974	1049.53	956.854	1059.45	1083.67	1168.23	1130.53	1406.08	1121.7	1202.83
21	975.366	1042.55	949.266	1053.54	1070.78	1127.05	1098.86	1360.5	1068.61	1184.91
21.5	953.363	1009.39	912.02	1002.54	1032.96	1077.18	1026.97	1273.05	1027.23	1153.98
22	924.274	964.346	887.634	955.066	996.46	998.783	954.377	1191.74	950.597	1082.09
22.5	854.486	912.92	824.009	903.546	923.569	914.954	882.883	1079.81	859.903	999.557
23	791.003	871.137	745.243	833.786	847.703	848.386	762.809	974.466	762.197	933.58
23.5	738.274	797.143	670.083	775.569	760.249	748.497	686.811	869.111	657.64	855.3
24	691.463	710.197	592.249	680.943	667.42	627	596.197	755.597	536.203	751.037
24.5	616.803	612.777	489.394	567.214	557.154	538.426	486.094	622.191	436.766	631.951
25	531.337	514.009	416.377	481.991	459.903	413.96	374.274	482.563	321.854	540.04
25.5	451.757	410.846	305.34	392.591	344.269	308.6	257.263	359.769	219.763	448.526
26	386.574	282.494	221.743	288.849	243.154	180.086	148.529	245.966	113.189	337.263
26.5	299.963	157.463	161.029	188.611	125.831	72.7086	55.0286	104.986	14.5429	215.443
27	218.703	51.6143	79.9971	84.0229	11.3171	-19.0343	-70.9314	-23.92	-68.5143	96.3686
27.5	135.066	-48.0457	3.26	-0.42286	-88.7286	-112.631	-182.791	-145.589	-152.269	-5.92571
28	63.8629	-137.526	-44.4114	-88.7686	-188.12	-206.617	-281.197	-262.72	-233.037	-96.2029
28.5	-0.00571	-224.077	-116.783	-170.743	-267.857	-282.237	-345.663	-359.794	-320.849	-191.586
29	-62.7686	-291.251	-174.171	-252.529	-335.24	-353.991	-398.337	-484.443	-381.166	-274.166
29.5	-128.351	-337.229	-219.36	-320.446	-406.571	-406.991	-463.971	-572.74	-455.263	-355.146
30	-172.934	-366.971	-284.797	-379.966	-441.451	-459.96	-494.637	-632.966	-491.94	-404.509
30.5	-225.074	-403.869	-311.626	-438.734	-481.106	-496.171	-531.16	-694.257	-550.694	-462.009
31	-271.129	-438.26	-343.229	-465.917	-497.22	-532.746	-549.957	-726.289	-594.591	-512.146
31.5	-330.223	-475.251	-372.38	-490.777	-518.657	-575.457	-568.331	-766.686	-626.826	-544.374
32	-370.891	-507.166	-391.874	-492.5	-539.943	-602.64	-576.96	-785.437	-644.251	-592.374
32.5	-402.777	-538.78	-401.34	-494.497	-554.974	-614.537	-584.42	-782.103	-668.82	-620.271
33	-431.083	-561.297	-418.534	-487.591	-554.811	-616.723	-575.263	-789.049	-660.991	-619.189
33.5	-441.82	-593.786	-421.717	-490.2	-539.483	-629.977	-571.383	-771.757	-670.546	-630.32
34	-450.957	-592.84	-432.814	-468.397	-504.737	-619.043	-545.983	-766.126	-654.654	-633.683
34.5	-460.746	-568.869	-422.329	-454.677	-483.983	-599.623	-525.08	-760.017	-638.377	-603.586
35	-442.897	-543.591	-418.406	-419.451	-449.154	-563.637	-484.043	-722.16	-611.057	-573.231
35.5	-424.089	-504.263	-405.503	-403.497	-408.351	-528.263	-454.226	-685.5	-570.94	-512.929
36	-398.371	-465.523	-383.349	-363.917	-351.343	-482.823	-406.669	-627.886	-525.426	-462.129
36.5	-365.149	-425.08	-369.491	-321.783	-306.629	-418.969	-351.96	-573	-466.243	-412.183
37	-336.323	-368.469	-329.1	-274.017	-268.797	-367.926	-287.323	-509.511	-405.931	-340.791
37.5	-301.914	-323.349	-283.689	-230.637	-229.034	-319.374	-222.274	-411.877	-346.897	-273.337
38	-257.069	-264.894	-234.086	-191.649	-168.963	-250.806	-143.431	-311.277	-266.711	-214.103
38.5	-228.989	-206.151	-180.026	-157.489	-104.331	-167.334	-84.04	-216.374	-205.117	-155.517
39	-188.543	-159.949	-120.606	-104.477	-40.4371	-100.283	-19.5371	-129.74	-122.9	-105.16
39.5	-141.289	-99.2857	-79.9629	-76.3057	12.6686	-29.3971	46.96	-16.5771	-44.0543	-53.8857
40	-93.82	-31.3571	-14.6457	-35.2343	72.6114	21.1829	120.389	89.3229	33.2657	1.34571
40.5	-53.8457	34.5771	47.2286	5.05714	133.114	110.366	158.5	168.894	97.04	31.9971
41	-13.8143	93.9057	101.366	42.0914	185.211	176.009	220.629	229.203	156.531	63.7257
41.5	28.2229	144.431	141.997	91.5486	220.943	224.903	254.3	293.249	235.091	106.351
42	82.7829	201.38	174.911	133.651	256.5	284.394	295.243	368.08	310.314	144.063
42.5	110.257	268.194	225.429	163.051	287.363	332.314	327.349	445.186	348.506	173.206
43	131.126	303.169	253.32	195.371	319.34	362.691	348.631	487.357	395.577	222.874
43.5	160.354	332.974	272.08	215.509	342.146	408.26	354.826	523.34	412.269	240.051
44	185.631	352.843	283.92	237.86	348.149	438.583	361.737	566.737	440.531	266.729
44.5	219.217	388.351	297.537	271.289	364.269	470.04	369.306	625.86	480.583	313.789
45	247.183	388.857	299.423	281.04	368.103	502.946	383.554	654.28	473.203	329.486
45.5	258.009	389.786	321.114	292.123	367.571	490.406	386.911	667.997	466.437	318.883
46	280.097	389.62	313.843	289.106	356.094	491.526	388.286	658.026	459.306	329.526
46.5	286.206	409.5	316.106	296.449	335.4	499.511	394.334	643.374	459.131	305.623
47	289.854	423.077	322.034	304.363	313.546	479.383	379.729	623.26	469.86	296.774
47.5	299.451	430.411	316.634	290.357	308.791	438.757	397.103	603.44	468.226	295.063
48	289.1	419.837	300.223	259.831	281.023	399.789	371.331	559.46	452.306	279.906
48.5	273.32	427.2	285.326	243.963	247.477	340.603	318.446	514.74	449.366	280.654
49	264.986	416.289	256.406	216.92	217.04	288.106	274.811	442.966	427.517	291.791
49.5	235.563	380.08	234.097	195.431	181.643	226.829	232.64	371.111	389.243	274.146
50	244.237	369.637	231.769	187.206	151.817	181.674	188.946	325.557	369.751	281.62
50.5	228.14	341.949	205.811	164.126	121.237	142.271	148.589	267.066	317.749	279.669
51	194.309	305.88	178.486	139.54	86.5714	109.711	83.3457	217.3	278.617	268.277
51.5	179.7	258.129	144.029	122.36	58.8857	79.8629	49.16	166.957	247.451	248.877
52	157.151	199.563	121.131	84.0657	31.8543	49.2686	24.2457	113.1	205.063	215.274
52.5	127.466	147.909	97.3857	48.8143	-5.58286	35.8743	0.982857	65.8543	164.771	188.491
53	111.594	116.48	56.3543	20.84	-36.64	9.11143	-32.8771	33.1829	144.774	166.44
53.5	80.7114	44.4457	9.11714	-29.0343	-63.4543	-34.04	-76.24	-27.4286	78.8714	127.749
54	52.4943	-18.0943	-20.3571	-72.1229	-80.54	-76.7114	-105.637	-80.6343	44.8486	110.177
54.5	21.3371	-69.72	-58.4286	-89.2857	-101.574	-115.806	-127.68	-144.574	7.05143	67.66
55	-9.30286	-100.577	-85.4686	-116.157	-132.763	-154.229	-163.64	-199.814	-54.1457	32.32
55.5	-37.7714	-124.897	-110.966	-129.88	-140.629	-175.246	-180.514	-231.271	-92.7343	0.682857
56	-60.8857	-162.049	-144.826	-142.574	-135.469	-216.606	-204.851	-233.086	-131.18	-33.4571
56.5	-74.6971	-193.577	-154.58	-156.303	-139.586	-213.954	-217.88	-261.306	-160.917	-58.7771
57	-106.426	-226.714	-183.246	-160.683	-137.134	-223.817	-225.503	-272.786	-189.226	-97.1229
57.5	-128.62	-240.809	-202.566	-167.86	-153.471	-228.757	-235.489	-273.18	-215.103	-131.12
58	-138.134	-259.131	-212.5	-187.909	-169.56	-231.386	-243.583	-276.394	-238.254	-154.14
58.5	-148.074	-278.503	-213.729	-189.543	-171.851	-229.943	-239.506	-270.463	-250.909	-165.617
59	-152.757	-292.811	-223.38	-193.171	-175.534	-235.517	-244.329	-268.523	-274.84	-177.751
59.5	-158.257	-299.371	-214.266	-182	-185.337	-220.486	-239.171	-286.969	-279.334	-189.794
60	-160.311	-289.503	-206.874	-171.66	-177.169	-218.3	-228.746	-265.111	-271.634	-183.591
60.5	-164.017	-276	-190.323	-175.123	-180.611	-211.303	-212.757	-250.62	-251.091	-172.966
61	-157.066	-272.571	-171.626	-159.849	-163.417	-188.334	-185.603	-228.797	-231.331	-176.88
61.5	-159.371	-267.026	-154.823	-146.3	-150.411	-175.34	-174.846	-217.02	-222.571	-172.157
62	-165.257	-256.217	-146.054	-146.606	-145.763	-161.18	-157.88	-210.426	-212.677	-188.826
62.5	-164.603	-247.569	-133.369	-132.98	-144.383	-136.334	-136.986	-196.677	-190.611	-182.143
63	-160.083	-225.1	-128.563	-127.58	-138.423	-118.949	-121.1	-191.677	-173.114	-171
63.5	-172.286	-214.451	-128.909	-121.437	-127.809	-106.617	-104.014	-182.023	-170.006	-181.194
64	-167.471	-192.671	-114.926	-116.194	-117.26	-76.6543	-90.1743	-170.129	-160.366	-181.463
64.5	-168.777	-167.443	-121.714	-110.757	-117.374	-65.5343	-84.1257	-150.897	-153.697	-167.923
65	-156.103	-142.254	-109.446	-98.2314	-105.677	-33.3457	-69.0114	-135.137	-139.006	-164.629
65.5	-145.414	-125.363	-99.1257	-77.3429	-85.3371	-6.29429	-55.6571	-90.48	-92.5743	-132.483
66	-137.009	-109.737	-94.2057	-67.2771	-71.7629	2.70571	-48.84	-73.2057	-69.08	-122.114
66.5	-132.314	-86.5371	-72.6171	-65.9743	-69.5857	18.5429	-39.6229	-58.1571	-46.12	-110.34
67	-121.429	-74.3171	-58.2514	-67.2029	-76.2857	24.2486	-29.22	-53.3971	-16.6	-96.1714
67.5	-112.209	-55.9886	-52.0286	-47.2171	-74.4429	26.2114	-20.5771	-40.8229	6.00286	-81.42
68	-99.2229	-39.7057	-32.86	-37.5314	-62.7086	37.08	-11.42	-34.6457	30.9171	-55.9743
68.5	-91.6829	-21.2257	-31.2057	-39.9286	-61.9543	31.7457	-1.72	-18.6057	49.3029	-31.0971
69	-82.12	-6.4	-19.7029	-36.3571	-62.4829	31.7514	0.18	-37.2971	40.1571	-16.1971
69.5	-75.74	10.9543	-14.06	-42.7343	-58.5914	37.8371	0.582857	-37.0429	46.7743	-10.5571
70	-59.5857	23.3257	-9.76857	-33.3114	-38.5543	38.6886	5.50286	-7.06	49.4429	7.34857
70.5	-38.98	41.06	-5.49714	-14.3629	-26.8629	52.9229	3.43143	14.8886	56.0057	20.98
71	-24.0971	52.8257	7.02286	-11.2029	-14.7286	55.8886	6.34571	33.3371	58.4143	39.4914
71.5	-17.9486	64.4343	13.76	-1.34286	-0.96	49.9886	9.27143	44.76	40.8514	39.94
72	-21.56	60.2943	10.3257	9.29429	-4.53714	30.9743	-0.36857	37.1	22.3571	32
72.5	4.19714	79.6143	27.3543	23.14	10.2486	49.4257	28.0343	70.1229	50.0657	50.4514
73	26.2543	101.551	45.58	44.9743	21.7286	55.3771	50.9429	99.9	63.88	71.7543
73.5	47.7457	116.629	55.9286	56.9857	33.5171	55.4971	60.6257	111.131	63.58	78.5514
74	53.1171	115.78	70.3114	64.3486	37.4514	53.7314	75.3371	114.986	50.4543	91.8029
74.5	62.7743	127.406	84.0429	76.6457	53.3171	61.0229	96.4429	119.091	57.62	97.1429
75	79.0829	130.654	91.56	81.5714	58.6514	69.9371	104.094	120.983	72.7086	101.223
75.5	102.943	140.714	111.591	95.9286	77.92	81.1371	126.563	131.606	99.5714	116.937
76	98.9514	137.834	108.974	91.42	82.72	67.66	121.68	120.303	86.3229	100.349
76.5	94.0314	133.874	106.797	92.7257	95.46	56.4171	116.077	113.094	66.1886	94.7029
77	92.1514	114.574	109.803	95.5514	88.8171	50.4543	113.129	102.389	66.6	90.98
77.5	101.703	106.18	109.663	92.0714	89.9114	33.34	106.031	92.5971	67.2029	73.3971
78	101.011	89.5029	98.2886	86.8257	81.6943	23.0143	88	72.5829	50.9143	57.7229
78.5	100.771	70.92	100.743	82.9914	82.1371	10.48	78.6457	51.94	45.8257	44.7629
79	92.8286	66.0029	85.8457	70.8257	88.6286	7.20286	60.2657	42.6886	26.76	30.2314
79.5	83.8457	40.3343	73.0171	61.36	84.72	-6.26286	40.7286	34.5771	16.64	24.5314
80	78.96	29.8829	64.6257	52.8857	75.2286	-17.3829	24.1486	7.82571	20.4143	14.78
80.5	66.6086	13.5314	50.7971	39.1914	69.2286	-20.74	15.9029	-1.46857	16.1486	-0.40286
81	51.02	2.93429	41.8943	30.4086	69.6143	-24.56	-0.14286	-16.5086	5.4	3.9
81.5	51.3	-10.9714	39.1629	20.5229	61.8486	-30.04	-4.45429	-19.0143	4.33429	4.59143
82	49.1571	-15.6314	24.3457	20.7457	47.58	-25.1314	-21.0714	-20.8829	-0.25143	-1.74286
82.5	45.0943	-32.9057	24.18	16.1714	38.4086	-28.9771	-22.6543	-31.8057	-0.78571	-5.32286
83	45.1714	-30.1657	19.3857	15.2514	32.0971	-29.4029	-30.7943	-51.7171	-6.2	-12.2771
83.5	36.5714	-48.3571	13.6286	12.0057	29.5686	-25.0943	-43.6457	-53.5771	-17.1457	-12.36
84	24.3571	-46.1943	3.58	10.7343	24.2086	-23.96	-47.7514	-66.1057	-31.6143	-20.86
84.5	24.5771	-47.8857	-11.4771	14.8657	27.3714	-21.2657	-43.6943	-63.2486	-36.9886	-32.2829
85	12.7771	-50.8743	-27.5657	7.12571	29.4286	-25.3771	-48.0371	-66.32	-42.5114	-35.8257
85.5	-12.26	-45.5486	-38.9514	-10.2571	28.6086	-36.0657	-40.1114	-72.96	-49.9171	-38.2371
86	-21.7914	-45.9029	-47.7686	-13.4143	15.6571	-25.1086	-41.3229	-62.1771	-60.4514	-34.5714
86.5	-32.1829	-47.2429	-54.2371	-18.3914	15.1229	-15.3229	-38.92	-45.1914	-64.8429	-36.46
87	-28.0571	-49.3257	-66.9229	-21.4257	7.98857	-14.1343	-33.0143	-40.9057	-60.2914	-42.6143
87.5	-25.7229	-58.3543	-65.4229	-21.8686	9.91429	-8.36571	-34.6543	-37.1371	-59.5943	-36.8543
88	-32.2114	-58.6571	-65.3886	-30.0057	6.71429	-5.03143	-39.4057	-43.9857	-57.2371	-24.9343
88.5	-31.0114	-60.1143	-60.3571	-24.4629	6.90286	9.23143	-39.6514	-36.5971	-51.1457	-22.7429
89	-20.6229	-63.4171	-55.14	-16.16	7	14.1543	-40.5543	-23.3	-51.62	-11.12
89.5	-13.1857	-55.4343	-59.3571	-16.7371	6.33143	2.23143	-42.4057	-32.54	-51.1457	-13.2371
90	1.16286	-50.9743	-46.3771	-18.5629	-4.73143	-2.82571	-40.8771	-33.46	-48.2657	-19.5886
90.5	1.42857	-51.3971	-34.3257	-28.4914	-17.9457	-1.66286	-42.4943	-39.3257	-50.8057	-21.6571
91	7.20857	-35.08	-33.4171	-35.1029	-29.2486	-13.2257	-38.74	-36.1571	-49.5629	-25.9771
91.5	10.8086	-35.54	-33.1	-43.8714	-23.74	-14.9171	-37.9029	-20.3829	-42.7314	-34.7429
92	6.72857	-27.5514	-36.6743	-52.22	-34.9029	-24.7571	-42.9714	-26.7686	-39.0886	-42.1229
92.5	3.30857	-23.6343	-32.0429	-55.9943	-36.4457	-25.2514	-43.7114	-31.0286	-32.4	-51.4086
93	-1.36571	-23.0657	-32.3629	-62.0029	-36.0171	-20.6257	-45.14	-30.56	-24.4	-52.9371
93.5	-6.17429	-29.3229	-24.0486	-67.5229	-30.7686	-28.86	-46.4943	-25.7486	-19.9914	-36.5343
94	-12.5457	-15.7743	-28.7771	-58.8457	-25.66	-34.34	-45.1686	-10.9714	-15.9486	-31.36
94.5	-18.7314	-13.18	-20.8229	-56.1314	-26.0057	-30.8343	-48.6686	-16.1829	-9.46857	-25.2314
95	-17.9829	0.08	-13.34	-47.4886	-46.0943	-24.3286	-40.9857	-12.4743	-4.60857	-13.3429
95.5	-20.12	-3.22	-4.20571	-37.3514	-53.56	-19.5286	-31.4057	-9.49714	-8.3	-7.31143
96	-22.6743	0.694286	7.54286	-31.7314	-60.9486	-25.2571	-30.8057	-9.75429	-5.94571	-2.43143
96.5	-27.2257	-3.88	9.77714	-18.7057	-57.8886	-28.8914	-25.7743	2.36	-6.72571	-5.33143
97	-40.8371	6.87714	0.591429	-9.90857	-65.78	-26.2286	-22	0.385714	-6.41143	-15.1057
97.5	-43.6257	-2.54286	3.24857	-14.4829	-66.3514	-22.3514	-22.6829	-15.1743	-11.9571	-19.6114
98	-53.3229	6.53429	9.34	-10.4657	-58.6686	-23.5057	-14.3857	-4.20286	-15.8371	-13.9629
98.5	-52.2771	3.23143	8.50857	-6.97429	-59.0857	-32.8571	-14.7514	-13.78	-14.2171	-19.6657
99	-46.3257	6.53143	1.59143	-9.63714	-51.78	-37.5314	-14.2514	-14.2657	-14.0971	-19.7457
99.5	-39.0286	11.54	-3.62	-7.98286	-46.0371	-24.8286	-5.86286	-0.17714	-13.2571	-12.7857
100	-44.1686	8.15429	5.43429	-14.6971	-50.0743	-18.6	0.605714	-10.04	-14.3829	1.43429
100.5	-30.8686	6.52286	-4.20857	-13.8257	-44.5714	-17.5	9.34	-11.4971	-12.2286	3.11429
101	-31.8029	9.39429	-10.5886	-7.39143	-44.2	-15.5914	14.7857	-7.90571	-6.00571	8.52
101.5	-15.7743	-3.32	-20.8314	-5.08	-44.0543	-9.58286	22.2629	-8.66857	-0.67429	8.18571
102	-25.86	-5.46	-21.3229	1.17143	-36.28	-0.37143	23.9029	0.44	-1.47714	3.31429
102.5	-26.4057	-10.0886	-24.9629	-2.36	-37.7857	-1.53429	24.2086	3.34857	-3.76	0.174286
103	-31.92	-16.1029	-25.0457	2.40286	-28.4857	1.84286	28.0029	-8.09143	-6.19714	3.66857
103.5	-19.4029	-9.46571	-30.3314	5.20286	-25.9914	-0.00571	27.4314	-10.8657	2.6	3.58286
104	-21.2286	-5.42	-25.8857	2.74286	-18.6314	1.38571	23.56	-13.3114	-3.49143	9.88
104.5	-22.2457	5.62857	-24.5343	9.48286	-6.75429	4.29429	30.86	-7.33429	3.36571	17.9229
105	-22.06	4.20571	-25.1914	9.08857	-9.08571	3.59143	26.7143	-7.30286	2.72	13.2429
105.5	-14.9686	6.72571	-38.0829	-1.70857	-7.23714	-4.43429	23.4486	-17.9229	-5.23714	13.9857
106	-16.4914	0.551429	-30.48	1.23714	1.25714	-4.31714	17.3914	-20.6657	0.46	12.1371
106.5	-9.72	1.73429	-34.7086	-0.05143	-3.44286	-15.2657	18.3143	-18.5371	2.40571	-0.27143
107	-10.9229	-2.04286	-37.7543	3.06	0.377143	-14.9829	13.8971	-14.92	0.331429	-14.4886
107.5	-9.74	-5.44857	-37.6971	4.50571	-0.31714	-19.1686	16.3143	0.76	4.17143	-18.6343
108	-10.2886	-17.5343	-30.8543	-3.8	-12.7086	-21.8971	3.89714	-7.23429	-6.90857	-31.2629
108.5	-12.6657	-22.5829	-27.3	-6.32857	-18.96	-21.9171	-3.68857	-14.0057	-3.88286	-34.8286
109	-8.02	-28.8686	-10.7143	0.022857	-16.2971	-16.0857	0.88	-5.04857	4.99143	-32.5143
109.5	-3.51714	-15.7514	-5.27714	3.13714	-9.30286	-15.3686	4.32571	-4.44857	5.01714	-29.5057
110	1.12	-14.84	-1.46857	-3.32857	-11.6314	-10.3857	-4.82571	-1.64857	3.78571	-30.5086
110.5	4.03714	-12.0657	7.25143	-0.08571	-19.4286	-14.2486	-5.91143	-1.57143	0.857143	-30.5657
111	-4.60857	-21.4286	8.94571	4.22571	-18.0971	-8.55143	-9.56286	-10.2171	-1.16286	-36.7171
111.5	1.64286	-19.0686	11.6286	10.1257	-14.44	-7.72571	-3.14857	1.9	3.35714	-34.6829
112	0.591429	-9.50571	10.0343	10.5743	-7.67714	-12.58	-2.24	1.12571	-6.32	-37.84
112.5	-1.23429	-11.8571	-0.34	6.65143	-13.5343	-17.0943	-4.74286	-5.04286	-10.0114	-41.5829
113	-3.4	-12.66	-5.59143	8.61429	-24.6	-18.9971	-8.23143	-2.76	-14.4343	-41.94
113.5	-12.6114	-10.8629	-4.29714	3.71714	-28.3143	-19.7686	-5.22571	-5.98857	-22.7886	-39.2971
114	-17.5714	-16.14	2.56571	-7.76	-23.8686	-15.8571	-11.5257	-0.83714	-23.3	-34.4486
114.5	-15.9257	-12.84	-0.72	-14.3286	-29.3286	-13.76	-12.0686	-0.64286	-24.2314	-32.9971
115	-18.5229	-14.3143	-9.67714	-24.4886	-31.8829	-10.7714	-22.7771	-7.92286	-31.5571	-32.5886
115.5	-9.6	-15.64	-6.64857	-25.3143	-21.4343	-9.00571	-21.4714	6.36857	-25.52	-26.38
116	-8.22	-9.24571	4.78571	-25.3429	-16.64	-4.26	-27.5514	2.58571	-30.64	-11.92
116.5	-15.8657	-13.0371	5.08286	-35.3429	-16.68	-2.99429	-28.1257	6.74	-29.8257	-13.4657
117	-13.0229	-15.0343	2.83714	-29.8114	-13.3943	1.19429	-34.5829	9.73143	-25.4571	-8.8
117.5	-16.98	-3.48	4.57143	-28.7543	-10.1714	1.74857	-22.3543	5.95429	-26.8629	-3.47143
118	-9.16571	6.47143	17.2057	-23.92	1.38	3.47714	-23.3229	9.67143	-25.72	0.942857
118.5	-3.94857	13.4029	18.7143	-13.02	9.46	-4.85429	-19.0143	10.4257	-22.08	7.42571
119	-1.4	26.4514	16.92	-8.95714	4.76571	-1.32	-21.0286	10.7343	-23.0057	7.35429
119.5	2.36	37.6371	10.8029	-0.3	9.79429	-1.32857	-11.8	18.2029	-16.9771	10.2486
120	13.7571	42.5886	8.99714	14.2057	18.5257	6.82	-2.03143	20.1114	-11.8914	21.54
120.5	15.42	54.0543	13.2343	25.7	23.4771	8.91714	3.61714	18.52	-4.72286	21.5914
121	22.8714	53.0057	3.19143	31.6657	26.1629	9.14286	-8.91714	22.1914	-4.24286	18.4943
121.5	25.6327	47.3469	-4.71429	37.6326	27.6122	4.5102	-4.55102	22.551	3.59184	29.4694
122	28.4554	40.6667	4.7381	31.7887	27.122	10.6518	-0.24405	21.6756	2.72917	31.3601
122.5	22.6109	33.3404	11.8207	31.5258	34.3587	17.8571	2.43161	18.3344	4.03343	30.2979
123	23.0466	24.6335	6.72981	32.7516	34.5062	19.0994	2.81677	10.9286	8.8354	23.3634
123.5	26.0889	26.2254	11.873	30.327	40.6825	18.7524	-4.55873	2.39365	8.76825	13.1143
124	31.263	20.2954	19.6461	22.7922	49.4058	14.6364	1.65909	2.68506	11.9156	21.2078
124.5	39.4452	24.6811	18.8339	31.5183	56.5914	15.0997	12.6611	-3.63123	15.6777	19.4651
125	35.4286	21.0952	23.4524	29.3333	55.4048	14.7857	5.97619	-13.381	12.5	14.5
125.5	33.216	21.5296	12.4077	36.9129	63.8084	15.2544	8.92683	-16.5017	20.7735	14.554
126	24.6357	10.5786	8.28214	42.0393	56.4571	4.61429	5.575	-28.7607	18.9107	16.05
126.5	13.7363	-0.23077	11.9707	32.0769	48.1831	-0.15751	0.113553	-24.8425	14.2528	8.25275
127	1.00376	-12.4286	8.00752	22.6842	42.6541	-5.63534	4.13158	-18.4211	16.3459	10.7368
127.5	-0.41313	-19.8378	2.81467	14.6834	30.3359	-10.1081	1.93822	-21.6873	11.7297	0.123552
128	-11.9802	-36.0635	0.781746	2.69444	14.869	-10.3571	-3.14683	-22.6944	9.53175	-1.05952
128.5	-11.6286	-34.4857	-3.48571	-1.8	0.285714	-11.1143	1.08571	-23.9714	8.02857	-10.1429
129	-16.6176	-39.7143	4.15126	-7.68487	-6	-19.479	-5.64706	-32.5546	8.4916	-20.3824
129.5	-18.4199	-36.8312	-4.90909	-22.9351	-13.5455	-18.5152	-0.35498	-34.8355	8.46753	-25.5108
130	-16.2902	-44.0804	-14.1295	-27.6652	-17.0089	-24.1652	1.09375	-40.9107	2.49554	-28.2902
130.5	-9.99078	-43.1014	-11.7465	-28.7419	-23.9862	-29.0737	-3.91244	-50.9677	-7.33641	-30.5576
131	-26.7524	-47.3714	-19.1095	-27.5857	-33.6571	-28.8476	-7.00476	-55.2619	-12.0524	-35.3476
131.5	-36.7143	-48.0591	-22.5862	-35.6749	-41.9507	-38.9113	-4.34975	-59.1724	-19.4729	-43.3695
132	-39.6071	-55.2857	-24.4643	-48.3929	-38.1071	-41.0357	-5.96429	-62.8214	-29.8571	-45.8571
132.5	-44.4074	-55.8889	-32.9815	-55.4815	-50.5556	-39.8148	-4.46296	-58.5926	-41.1111	-46.4074
133	-38.4077	-59.3769	-28.8538	-53.9769	-51.8615	-45.0077	-7.40769	-54.1538	-46.0615	-48.0923
133.5	-39.52	-46.8	-18.99	-52.87	-53	-41.59	-8.19	-56.68	-47.05	-43.7
134	-180.821	-259.857	-163.5	-89.3929	-266.393	-66.6429	-62.1071	-77	-62.9643	-51.1429
134.5	-188.963	-265.889	-164.944	-93.7037	-275.056	-61.7222	-59	-75.537	-64.7407	-50.2407
135	-188.715	-265.646	-160.123	-88.4462	-272.915	-56.5308	-57.4692	-81.6231	-69.6923	-38.9
135.5	-197.78	-262.34	-149.93	-98.63	-279.55	-68.51	-61.15	-86.49	-71.48	-37.79

## Sheet: NES-mNG-CK1_2
Time (h)	NES_PBS_1	NES_PBS_2	NES_PBS_3	NES_PBS_4	NES_PBS_5	NES_DOX_1	NES_DOX_2	NES_DOX_3	NES_DOX_4	NES_DOX_5
0	859.365	1372.35	374.865	617.077	212.385	179.827	267.346	-291.308	32.1923	627.077
0.5	855.193	1497.98	366.859	711.393	199.726	188.807	195.57	-260.948	49.3259	645.674
1	711.405	1424.9	231.94	648.583	69.8809	119.393	61.8691	-382.893	-46.381	527.345
1.5	467.936	1231.78	5.26108	417.596	-260.867	-112.68	-212.389	-642.995	-292.616	256.217
2	287.791	1173.88	-139.948	305.586	-463.914	-208.781	-411.443	-840.805	-468.3	77.019
2.5	-141.203	764.24	-601.018	-125.415	-973.184	-633.931	-838.092	-1244.53	-873.719	-387.88
3	-830.393	103.509	-1204.68	-673.031	-1643.73	-1238.52	-1468.08	-1846.01	-1457.24	-1033.38
3.5	-1585.17	-670.745	-1942.14	-1353.27	-2407.12	-1937.2	-2182.57	-2540.35	-2148.35	-1776.37
4	-2360.12	-1523.33	-2720.36	-2165.53	-3197.5	-2661.9	-2913.17	-3268.16	-2874.2	-2574.82
4.5	-3040.4	-2258.57	-3410.71	-2889.97	-3944.77	-3377.2	-3602.69	-3917.17	-3549.77	-3334.8
5	-3581.52	-2885.13	-3991.68	-3471.72	-4455.63	-3960.88	-4158.07	-4433.16	-4085.89	-3910.94
5.5	-3930.02	-3353.3	-4359.25	-3893.33	-4834.89	-4304.44	-4573.51	-4736.19	-4415.36	-4411.47
6	-4113.23	-3625.67	-4546.29	-4162.07	-4994.05	-4512.95	-4818.93	-4881.42	-4616.91	-4634.81
6.5	-4108.27	-3705.64	-4579.42	-4290.8	-4995.62	-4525.71	-4897.08	-4879.79	-4628.37	-4687.21
7	-3950.15	-3651.88	-4431.09	-4264.34	-4836.23	-4417.07	-4858.64	-4800.94	-4505.53	-4605.59
7.5	-3701.4	-3446.07	-4125.37	-4066.15	-4602.73	-4218.35	-4680.63	-4584.16	-4289	-4462.54
8	-3366.48	-3194.48	-3794.12	-3802.45	-4225	-3936.95	-4387.74	-4303.21	-4016.02	-4177.07
8.5	-3005.2	-2848.95	-3370.42	-3441.07	-3773.17	-3512.19	-4041.98	-3940.22	-3667.46	-3864.56
9	-2587.56	-2470.01	-2848.63	-3005.31	-3192.01	-3052.37	-3636.8	-3506.96	-3263.86	-3428.75
9.5	-2129.52	-2049.66	-2232.5	-2467.84	-2579.04	-2521.1	-3127.7	-3001.53	-2780.2	-2944.55
10	-1609.85	-1551.88	-1521.27	-1862.47	-1926.19	-1923.52	-2511.23	-2397.9	-2237.8	-2374.66
10.5	-1057.08	-1031.91	-805.97	-1236.28	-1186.38	-1276.27	-1826.55	-1691.32	-1641.18	-1742.09
11	-487.051	-472.634	-82.6071	-599.479	-377.848	-528.688	-1080.56	-903.536	-1011.14	-1037.85
11.5	118.51	54.5306	682.184	68.5714	374.857	220.49	-310.878	-111.673	-303.776	-354.98
12	700.974	630.277	1456.79	768.114	1193.08	927.3	475.86	712.911	443.709	413.3
12.5	1242.55	1128.8	2058.56	1368.52	1885.4	1569.83	1236.03	1492.89	1110.78	1146.73
13	1763.4	1663.82	2593.54	1954.14	2580.2	2150.9	1943.31	2276.19	1782.59	1806.61
13.5	2247.69	2158.36	3112.18	2512.34	3238.49	2706.59	2621.17	2996.81	2403.11	2434.08
14	2743.36	2617.97	3551.73	3045.65	3797.64	3256.63	3271.29	3689.84	2994.16	2998.28
14.5	3159.65	2993.62	3923.43	3538.01	4298	3698.44	3846.02	4254.66	3558.92	3525.34
15	3497.25	3333.26	4211.3	3915.69	4755.75	4051.22	4312.19	4754.45	4075.99	4059.72
15.5	3809.28	3555	4415.21	4180.29	5049.06	4388.22	4716.1	5190.63	4471.57	4435.99
16	4016.81	3731.08	4584.1	4384.18	5191.71	4642.79	5012.73	5453.17	4771.14	4706.78
16.5	4160.92	3834.78	4690.8	4476.36	5248.57	4824.25	5279.28	5599.75	4946.79	4969.55
17	4259.03	3840.81	4677.68	4508.27	5235.07	4921.2	5405.47	5696.91	5120.53	5146.78
17.5	4278.09	3735.59	4575.03	4444.61	5147.19	4924.4	5426.01	5718.29	5148.1	5246.38
18	4193.41	3586.61	4394.23	4283.2	4950.39	4848.75	5373.24	5651.93	5102.39	5198.68
18.5	4055.44	3410.19	4181.75	4116.21	4689.68	4746.43	5260.49	5486.44	5006.23	5109.52
19	3876.33	3184.89	3901.83	3868.78	4335.34	4511.5	5074.85	5292.2	4797.74	4931.71
19.5	3648.65	2889.15	3608.93	3592.24	4014.92	4206.34	4817.55	4994.71	4576.68	4709.53
20	3353.31	2552.61	3219.87	3309.2	3598.82	3893.39	4496.21	4654.44	4294.19	4390.72
20.5	3012.46	2231.82	2816.57	2976.48	3212.94	3549.73	4145.07	4271.29	3949.13	4017.88
21	2638.41	1958.81	2428.2	2616.7	2781.87	3165.27	3773.47	3829.45	3586.43	3632.39
21.5	2306.57	1604.89	2031.59	2276.66	2338.53	2775.62	3363.19	3366.51	3170.27	3256.88
22	1973.07	1259.57	1633.23	1907.92	1867.75	2334.31	2860.63	2936.36	2703.17	2801.83
22.5	1601.41	967.677	1239.5	1562.59	1502.96	1935.52	2387.59	2445.11	2315.1	2345.31
23	1220.81	722.734	806.469	1212.71	1079.7	1524.02	1906.17	1925.72	1837.51	1857.72
23.5	891.269	486.703	439.497	873.543	744.563	1130.29	1419.4	1421.12	1424.63	1392.46
24	553.26	194.294	49.2829	516.751	344.06	718.926	997.474	920.451	1019.69	979.337
24.5	192.663	-49.9	-296.463	221.749	-29.08	328.734	545.791	440.626	621.883	538.089
25	-168.574	-226.151	-581.309	-81.5486	-312.3	-64.8629	131.086	-27.1457	292.097	118.82
25.5	-481.434	-404.209	-839.049	-360.994	-558.071	-347.46	-179.977	-492.817	-26.4571	-278.723
26	-770.286	-593.317	-1064.39	-564.943	-823.74	-661.769	-522.366	-930.751	-363.783	-620.911
26.5	-995.529	-763.343	-1246.05	-752.866	-1042.07	-938.917	-831.897	-1273.09	-646.151	-940.091
27	-1226.81	-919.363	-1401.59	-921.571	-1244.29	-1179.3	-1087.32	-1547.21	-921.46	-1216.01
27.5	-1425.45	-1002.53	-1461.72	-1072.95	-1405.89	-1385.97	-1385.45	-1803.19	-1186.8	-1503.53
28	-1588.49	-1088.65	-1494.8	-1214.7	-1496.21	-1530.54	-1603.82	-2018.94	-1420.03	-1720.3
28.5	-1685.49	-1155.84	-1508.66	-1302.71	-1592.64	-1662.13	-1767.11	-2169.35	-1596.99	-1876.79
29	-1759.71	-1209.3	-1532.08	-1363.69	-1668.39	-1805.19	-1915.12	-2279.59	-1747.85	-2000.4
29.5	-1844.07	-1237.31	-1528.93	-1465.55	-1728.53	-1876.46	-1966.96	-2358.59	-1843.57	-2112.58
30	-1897.08	-1239.91	-1493.85	-1509.75	-1741.35	-1885.56	-2029.31	-2403.07	-1867.56	-2159.04
30.5	-1909.37	-1264.61	-1431.01	-1563.36	-1778.04	-1915.55	-2093.14	-2449.02	-1880.87	-2191.05
31	-1882.91	-1247.65	-1374.47	-1567.43	-1743.31	-1930.93	-2053.48	-2435.97	-1849.47	-2175.82
31.5	-1814.87	-1254.69	-1330.92	-1579.05	-1748.79	-1920.11	-2029.3	-2411.18	-1817.12	-2142.13
32	-1742.75	-1247.02	-1305.13	-1543.2	-1732.37	-1857.43	-2004.39	-2360.61	-1804.67	-2082.8
32.5	-1695.51	-1221.03	-1218.98	-1523.61	-1717.75	-1768.12	-1957.4	-2288.09	-1732.44	-2025.97
33	-1571.09	-1218.69	-1161.27	-1493.29	-1662.21	-1682.79	-1915.31	-2222.13	-1695.37	-1909.72
33.5	-1485.43	-1237.01	-1088.72	-1483.74	-1594.5	-1606.05	-1832.29	-2117.17	-1627.68	-1811.21
34	-1392.85	-1223.35	-1039.55	-1470.31	-1500.9	-1532.87	-1764.08	-2018.88	-1577.77	-1669.13
34.5	-1287.09	-1224.31	-1022.74	-1448.37	-1462.97	-1394.26	-1691.73	-1938.34	-1509.13	-1560.65
35	-1182.09	-1192.59	-993.146	-1400.44	-1418.85	-1320.61	-1621.44	-1834.18	-1426.22	-1448.29
35.5	-1079.35	-1178.13	-962.774	-1399.45	-1344.83	-1222.86	-1538.18	-1734	-1312.43	-1316.02
36	-988.197	-1145.05	-958.834	-1376.67	-1244.48	-1162.75	-1431.02	-1629.09	-1239.72	-1137.66
36.5	-905.109	-1087.62	-940.746	-1301.05	-1175.72	-1069.63	-1327.7	-1476.93	-1147.05	-1001.9
37	-811.603	-1038.1	-927.509	-1264.38	-1094.06	-979.811	-1203.64	-1311.52	-1070.47	-845.509
37.5	-719.466	-967.043	-926.5	-1178.92	-1008.5	-855.071	-1052.98	-1142.49	-961.703	-714.203
38	-626.106	-893.56	-906.426	-1080.17	-886.386	-751.317	-906.903	-967.257	-876.737	-580.849
38.5	-507.726	-806.711	-866.106	-967.44	-707.2	-610.986	-734.151	-803.429	-737.137	-444.28
39	-395.451	-705.606	-789.743	-827.289	-559.386	-491.057	-551.563	-639.731	-621.511	-347.631
39.5	-262.531	-620.203	-722.966	-718.214	-405.891	-333.949	-371.669	-435.703	-496.969	-261.229
40	-170.194	-545.863	-611.794	-599.191	-238.84	-183.591	-222.563	-253.846	-357.797	-117.754
40.5	-29.9257	-410.751	-543.549	-419.343	-118.877	-59.7971	-99.8914	-90.5743	-200.057	-20.7771
41	105.38	-288.329	-426.771	-272.489	36.0057	62.28	44.5543	77.7629	-82.5914	91.1229
41.5	205.666	-197.054	-317.854	-144.757	165.843	154.783	180.097	237.494	81.9343	212.626
42	278.423	-107.2	-188.909	-21.7257	277.394	258.283	313.703	413.674	166.097	328.771
42.5	340.717	-23.84	-88.4029	73.9171	389.906	354.846	417.146	559.14	254.017	440.237
43	402.711	64.7171	8.54286	207.126	477.257	434.271	477.463	705.691	372.257	546.077
43.5	486.657	141.597	56.6571	297.571	542.563	505.846	581.231	816.691	463.309	594.083
44	497.149	165.469	168.729	354.274	593.709	588.109	662.577	938.271	543.146	675.811
44.5	547.243	204.294	203.806	431.843	608.843	632.417	766.606	1043.85	650.277	733.663
45	561.869	285.117	269.88	492.677	628.223	727.734	799.397	1150.87	671.854	789.86
45.5	549.937	309.794	299.666	540.3	610.58	770.766	837.903	1220.74	740.449	837.977
46	551.534	336.891	303.569	570.511	612.097	815.929	865.463	1293.15	780.006	906.623
46.5	545.546	370.806	319.254	569.283	599.817	832.674	910.743	1322.56	803.583	940.92
47	528.226	393.934	352.757	566.326	580.423	841.526	917.423	1347.29	814.626	959.226
47.5	529.783	427.654	354.177	589.086	591.871	828.394	926.097	1294.4	791.403	949.077
48	475.771	436.074	416.783	574.429	606.734	836.883	877.897	1265.63	727.22	930.297
48.5	438.274	409.057	440.314	557.629	601.189	783.891	851.683	1198.87	745.503	911.257
49	457.34	410.294	435.789	531.006	568.566	768.697	799.489	1149.07	704.886	860.98
49.5	439.606	417.477	456.726	519.357	535.517	721.643	743.951	1088.64	659.574	793.194
50	428.44	382.394	433.809	511.997	467.583	667.617	680.577	991.709	598.831	724.92
50.5	410.76	362.317	431.303	475.429	422.469	595.789	621.777	882.551	529.983	638.749
51	395.114	344.22	424.769	391.023	383.651	553.003	567.6	823.48	469.203	578.074
51.5	367.08	295.691	362.157	311.611	312.426	471.729	495.531	696.149	422.677	516.88
52	348.1	254.397	322.889	267.074	257.669	380.086	439.311	592.534	336.743	424.783
52.5	284.114	204.686	332.111	203.651	249.171	306.2	367.783	456.191	262.871	346.437
53	222.56	158.997	299.946	129.103	197.746	237.637	309.074	336.191	204.069	264.289
53.5	145.523	117.431	293.223	58.9657	158.271	171.98	270.797	217.526	155.303	166.189
54	105.943	82.7543	229.76	20.06	127.011	100.223	190.071	153.989	112.194	89.1486
54.5	10.7771	48.5914	182.18	-2.18286	78.6914	28.6343	118.777	42.9943	47.84	-1.32571
55	-57.3514	47.62	153.003	-16.7943	29.2514	-39.3686	28.5857	-30.4943	-21.0343	-86.7486
55.5	-122.74	37.2971	99.8714	-69.0514	0.222857	-87.96	-55.8543	-125.163	-56.1714	-190.403
56	-187.949	27.8914	28.9686	-102.677	-88.5514	-166.786	-132.214	-192.991	-123.257	-279.137
56.5	-228.354	-39.8629	-14.7457	-119.474	-150.591	-250.803	-210.746	-284.091	-180.126	-377.994
57	-259.151	-83.24	-80.84	-151.629	-208.937	-299.74	-311.006	-337.354	-250.917	-436.271
57.5	-316.283	-129.42	-106.457	-181.954	-270.683	-357.869	-381.986	-436.32	-304.271	-484.477
58	-347.469	-187.4	-184.149	-233.337	-348.543	-419.594	-466.723	-504.257	-326.774	-543.351
58.5	-364.034	-262.08	-233.64	-273.231	-401.674	-480.926	-504.589	-535.051	-372.249	-579.066
59	-380.149	-342.174	-307.84	-295.869	-503.906	-505.174	-545.943	-563.669	-445.317	-591.394
59.5	-395.131	-365.769	-367.051	-318.106	-554.531	-544.151	-605.454	-589.177	-470.654	-613.423
60	-434.609	-408.4	-427.074	-376.603	-625.08	-571.631	-648.857	-611.871	-495.289	-633.411
60.5	-477.52	-415.534	-471.911	-438.843	-655.386	-601.857	-692.097	-632.36	-518.843	-643.363
61	-515.763	-442.249	-520.906	-481.866	-689.854	-605.117	-723.229	-645.269	-562.977	-674.4
61.5	-545.777	-453.217	-528.206	-512.786	-718.574	-616.697	-733.637	-649.486	-585.394	-686.98
62	-588.929	-469.069	-573.026	-557.789	-750.494	-611.371	-749.446	-676.997	-598.937	-692.357
62.5	-622.529	-455.031	-586.143	-590.797	-749.646	-634.18	-745.857	-678.186	-612.223	-712.691
63	-631.42	-477.52	-606.866	-632.709	-750.877	-631.254	-726.08	-686.874	-611.131	-709.417
63.5	-642.003	-452.657	-604.6	-622.051	-732.566	-623.32	-728.609	-687.389	-640.577	-681.803
64	-619.694	-443.92	-602.566	-622.56	-703.054	-618.369	-716.163	-705.1	-632.94	-658.254
64.5	-609.803	-446.14	-590.097	-603.423	-700.737	-593.126	-693.026	-689.717	-625.774	-639.083
65	-573.649	-455.949	-577.371	-582.44	-670.674	-573.474	-681.509	-662.366	-642.786	-611.297
65.5	-525.069	-441.234	-556.117	-564.189	-660.263	-559.294	-651.72	-656.263	-618.557	-598.226
66	-496.617	-432.574	-506.111	-564.017	-624.914	-531.854	-632.889	-658.986	-599.603	-565.609
66.5	-460.986	-408.863	-474.971	-552.326	-582.154	-515.974	-610.943	-636.174	-593.591	-527.226
67	-421.417	-400.049	-438.849	-565.514	-522.003	-488.597	-572.363	-619.163	-550.837	-507.769
67.5	-368.694	-369.243	-379.906	-522.614	-499.617	-469.666	-509.186	-591.603	-527.374	-480.257
68	-315.666	-317.811	-329.129	-503.086	-473.926	-433.723	-464.38	-561.469	-468.334	-430.854
68.5	-283.029	-240.306	-287.74	-480.126	-446.386	-402.137	-406.194	-559.563	-435.589	-391.511
69	-210.574	-175.151	-216.514	-442.809	-370.871	-348.126	-366.763	-520.774	-402.566	-354.143
69.5	-149.78	-129.434	-172.154	-376.223	-314.546	-307.174	-317.74	-499.009	-339.529	-307.791
70	-118.209	-70.86	-84.3086	-314.894	-271.38	-257.366	-263.429	-480.977	-287.443	-281.809
70.5	-58.2886	13.6829	-32.0171	-226.469	-243.32	-215.551	-199.969	-457.88	-235.157	-261.737
71	-20.5114	51.46	42.5314	-189.254	-201.489	-170.523	-154.077	-391.889	-180.323	-241.366
71.5	41.5171	98.3371	99.5943	-149.194	-119.414	-166.737	-99.2914	-355.789	-166.957	-206.209
72	86.9943	128.874	158.697	-79.9429	-82.3771	-139.274	-81.9771	-296.669	-120.486	-187.437
72.5	93.5457	187.494	235.306	-11.7686	-26.9029	-115.603	-57.9343	-251.486	-81.5457	-157.483
73	123.386	249.711	285.429	36.2914	6.46857	-75.8886	-26.8629	-171.351	-61.1771	-125.457
73.5	179.051	285.249	326.589	85.9886	58.9229	-26.6914	6.34571	-93.1886	-36.0114	-79.46
74	223.574	306.851	364.046	125.789	107.926	21.4429	26.3486	-29.3914	-11.2143	-14.02
74.5	266.997	348.306	389.277	186.549	181.289	54.7514	39.7286	-4.47143	1.10286	39.8743
75	280.269	381.377	404.786	264.6	241.1	108.314	51.6229	28.9114	23.66	69.9086
75.5	330.497	406.037	409.689	300.16	309.989	148.771	89.0571	73.7457	65.2829	116.037
76	340.597	405.891	401.043	324.111	352.986	182.477	119.24	116.449	90.0543	158.549
76.5	354.937	409.211	416.623	353.346	360.134	200.097	149.683	138.383	130.929	196.831
77	376.126	426.48	423.246	419.089	381.869	210.114	157.831	160.629	161.78	217.303
77.5	391.1	427.469	429.237	454.62	403.497	216.623	192.9	193.6	174.491	228.534
78	383.986	394.957	405.986	475.851	387.317	228.806	209.306	238.131	197.129	251.266
78.5	380.08	388.663	407.329	461.557	366.56	253.623	232.431	253.34	224.014	273.28
79	362.006	378.171	426.446	458.271	390.68	232.966	235.326	279.251	237.783	291.006
79.5	376.174	386.709	426.763	476.009	374.497	196.197	262.574	294.331	256.554	288.509
80	390.954	368.494	399.18	481.117	401.383	191.24	250.203	309.026	246.869	302.786
80.5	365.009	345.92	382.943	450.731	381.129	166.403	252.451	330.397	237.869	302.589
81	357.449	314.171	345.743	417.88	401.089	118.797	214.594	329.349	239.794	295.103
81.5	336.294	342.974	316.537	428.706	432.466	95.04	215.829	338.8	238.929	258.803
82	342.777	315.629	262.409	422.114	412.703	66.9514	162.566	349.366	221.1	227.194
82.5	315.051	289.471	251.243	397.994	341.166	57.4	146.449	328.1	199.029	192.606
83	279.931	249.171	202.569	368.274	324.423	61.2314	139.68	301.714	187.623	194.371
83.5	264.163	242.951	156.646	358.626	313.174	36.0343	143.683	269.449	181.609	158.931
84	251.211	235.991	110.691	313.266	317.397	44.0657	136.789	223.237	185.734	163.691
84.5	213.971	244.369	100.937	312.354	257.166	54.6257	108.677	192.391	170.5	131.154
85	220.071	204.583	108.854	262.217	189.143	66.3886	76.9943	118.617	169.791	128.177
85.5	159.906	181.44	90.4086	226.057	156.017	46.22	101.343	90.1143	170.729	135.651
86	146.963	168.494	25.8229	218.971	165.137	68.0714	96.68	61.5171	169.571	138.757
86.5	149.177	174.543	-6.98571	174.786	106.274	59.16	55.2914	58.3943	132.951	99.9457
87	92.3029	124.011	-25.3829	125.474	76.9714	64.3457	35.6886	48.4886	126.557	65.9257
87.5	85.98	114.531	-65.06	78.9771	35.18	59.14	16.26	17.1457	88.7343	22.7314
88	73.7714	80.5029	-97.5571	32.7143	35.2114	45.3657	20.2429	-4.96857	80.1657	13.5971
88.5	32.2686	62.62	-115.783	-19.7	35.3686	23.5971	14.6457	3.84571	58.5543	-13.5
89	39.1029	53.8286	-142.26	-28.8657	31.14	33.1657	-9.34571	-0.12	38.3943	-60.2571
89.5	24.7429	30.9143	-167.789	-38.28	11.7857	17.1343	-28.84	-17.4457	19.0171	-70.0971
90	-19.9571	8.42571	-188.814	-37.8171	30.0686	23.4914	-37.6771	-57.9314	8.24	-87.2771
90.5	-20.0343	10.5	-175.809	-62.0057	-15.4171	2.07714	-72.6886	-91.46	7.48857	-75.5314
91	-64.4057	-14.02	-140.457	-42.7029	-22.3343	0.337143	-81.88	-83.0886	5.22286	-83.3571
91.5	-109.38	-49.2943	-156.043	-53.5971	-59.7943	-13.7429	-81.2486	-87.4514	-16.3686	-84.4457
92	-115.909	-57.98	-189.651	-25.3514	-69.3229	-17.0714	-115.857	-107.22	-40.6229	-83.0457
92.5	-126.757	-64.4743	-180.166	-34.7514	-93.0429	-22.2314	-123.654	-138.44	-63.16	-68.6286
93	-158.429	-64.9771	-166.991	-51.9914	-81.1286	-44.4543	-113.38	-153.403	-82.2257	-84.62
93.5	-144.003	-73.2143	-140.563	-44.08	-82.08	-71.4571	-105.266	-148.423	-73.7486	-78
94	-168.323	-60.9029	-135.977	-30.4057	-50.4771	-62.4629	-97.86	-124.449	-111.966	-109.314
94.5	-156.766	-74.1486	-167.274	-10.8314	-42.7429	-76.0343	-84.1	-145.383	-117.606	-119.403
95	-146.46	-76.6429	-140.243	6.91714	-30.9143	-89.2457	-99.4714	-149.694	-124.1	-111.86
95.5	-160.729	-72.0343	-128.28	-12.1143	-7.20857	-101.154	-58.6629	-142.571	-109.106	-107.746
96	-176.886	-72.1114	-106.14	-22.8829	1.60857	-99.5543	-51.5543	-133.589	-110.834	-107.086
96.5	-149.374	-76.6457	-93.4457	-36.2029	4.83143	-79.9486	-80.0857	-121.349	-122.706	-123.46
97	-141.177	-81.7543	-81.0371	-72.96	0.482857	-71.5086	-59.6171	-101.017	-137.029	-119.074
97.5	-116.503	-87.4114	-84.7714	-70.7486	-36.88	-61.84	-54.5571	-109.611	-139.497	-94.1029
98	-115.317	-80.8171	-44.38	-84.0571	-58.5029	-59.0143	-59.6571	-94.8943	-142.449	-89.5514
98.5	-88.4686	-57.2943	-43.3257	-72.9571	-53.8629	-31.4743	-45.6229	-77.1571	-140.583	-94.7829
99	-57.5543	-44.16	-2.69714	-74.3257	-112.657	-14.2714	-43.0829	-59.02	-152.217	-84.3657
99.5	-9.76	-38.6857	4.01714	-63.4686	-104.163	-9.28286	-39.1229	-44.2286	-150.8	-72.3371
100	2.49429	-31.9343	39.7686	-39.9	-117.826	-23.2143	-9.36	-37.2143	-130.697	-52.48
100.5	31.1743	-22.9057	61.26	-3.99429	-122.677	-6.14571	-54.2257	-53.5686	-130.263	-35.6343
101	59.8143	-9.44857	80.7057	-0.96286	-70.9171	-8.65714	-29.3486	-52.1143	-131.606	-31.4886
101.5	77.7657	6.79143	98.48	-47.1314	-34.9086	3.12	-11.0971	-51.4629	-129	-13.0657
102	82.4371	-2.84286	99.0657	-35.2629	-13.5571	-3.91714	-10.0486	-46.7486	-126.043	-4.91429
102.5	95.0629	-14.4829	110.48	-13.5257	26.1486	23.1571	-34.8	-44.54	-114.594	-19.7229
103	63.6686	-10.0429	108.283	-1.89143	48.8029	24.5286	-21.34	-28.9257	-110.337	-6.44571
103.5	70.0086	0.131429	99.88	-13.0714	51.1057	39.36	-13.6343	-15.0657	-93.8886	19.98
104	48.1457	10.4943	87.26	-11.6371	69.1886	49.4771	8.21429	34.5829	-69.4029	11.8943
104.5	51.76	13.78	91.3429	-25.8114	41.1971	53.2514	36.3657	62.38	-12.4571	33.9514
105	80.1486	30.4543	79.6771	19.6743	38.4029	60.0171	25.6914	93.9257	23.3971	44.0914
105.5	112.769	46.9286	82.7114	19.5057	36.5714	58.2429	37.9857	104.251	42.1971	64.8171
106	126.569	78.1829	59.1457	16.5171	66.56	48.4857	81.28	114.517	61.4143	77.4086
106.5	164.214	77.6229	74.4743	16.6029	46.4314	33.4686	99.06	137.426	78.84	67.9371
107	154.249	84.2229	66.8286	65.3714	42.4229	26.52	97.6857	152.843	89.6686	74.8486
107.5	167.946	61.4229	72.2114	79.8029	91.6171	13.5486	133.977	133.406	101.74	79.3286
108	147.22	49.8886	65.7714	104.246	135.64	22.5571	115.191	130.237	89.7857	67.3629
108.5	143.471	52.5829	77.2743	116.777	168.811	11.5086	144.449	119.337	98.1143	69.3971
109	102.817	36.48	82.16	139.817	190.3	38.0514	160.703	117.429	104.526	63.8629
109.5	68.26	-4.22857	122.32	165.72	209.374	29.7971	141.034	121.506	94.9629	65.7457
110	43.1629	-2.19429	122.98	192.751	245.014	30.9771	115.751	100.189	96.8257	58.2629
110.5	20.2971	-15.2914	136.486	159.517	269.586	28.3371	132.997	78.9543	121.274	22.3314
111	4.60571	2.61429	152.423	137.237	226.42	38.2171	110.86	84.1	99.5143	27.3057
111.5	-6.03429	13.3257	154.977	119.203	172.866	32.5971	115.354	51.08	83.92	17.9029
112	-40.7143	-27.6143	143.857	101.783	118.751	30.8057	87.3114	63.9371	63.5057	8.79143
112.5	-45.5429	-30.98	129.417	88.9914	107.5	21.5857	70.6543	64.0543	64.3629	-9.23143
113	-65.8286	-30.7914	76.2571	39.4971	60.2714	31.6429	78.1543	32.1771	58.5057	-11.0343
113.5	-80.4	-63.2686	47.96	-2.75143	17.52	45.1257	81.58	17.8514	53.1514	-20.6714
114	-83.9629	-79.6943	13.9457	-17.8514	-15.5057	54.5829	46.5114	5.36571	37.6171	-11.1371
114.5	-91.0114	-105.626	-12.8829	-29.4257	-35.3171	53.6086	19.3829	-12.4171	37.0429	-21.5743
115	-91.7971	-112.251	-15.2057	-16.3943	-29.3143	46.3143	4.14	12.0029	39.1686	-31.6771
115.5	-114.277	-122.791	-69.7971	-29.8686	-48.6114	46.1886	-12.4057	-16.2514	33.92	-22.3371
116	-141.237	-108.449	-41.1257	-68.5229	-79.6286	38.3086	-33.4343	-13.4286	25.06	-28.98
116.5	-134.3	-106.957	-54.5143	-65.4686	-85.2114	21.9686	-56.5057	-0.77143	18.88	-32.8657
117	-138.566	-101.537	-63.7543	-65.0943	-97.4857	22.0571	-62.0914	16.2057	6.38571	-19.4943
117.5	-126.429	-111.306	-57.3629	-52.4286	-96.6686	20.3143	-44.8257	26.42	-16.6543	-28.24
118	-125.8	-104.78	-67.8229	-35.4886	-106.56	3.44	-22.6571	28.4029	-22.6057	-24.8886
118.5	-129.917	-127.694	-77.3886	-52.7657	-105.666	-13.2086	-26.8143	23.5886	-30.0371	-9.24286
119	-137.9	-116.523	-50.54	-39.9	-101.417	-20.4143	-7.53429	51.2971	-41.1571	-26.9857
119.5	-121.1	-125.683	-89.0429	-26.5771	-115.549	-40.9943	1.35143	40.4486	-13.5686	-30.8371
120	-118.894	-119.729	-91.9629	5.82857	-137.3	-50.4914	14.6914	39.2086	7.02286	-12.9314
120.5	-120.946	-105.834	-96.5914	31.7914	-124.309	-53.5257	8.03143	15.9029	10.9829	-15.14
121	-102.72	-88.7629	-103.671	25.3686	-122.983	-61.9171	39.9743	11.5686	20.6971	-14.36
121.5	-88.0657	-72.5429	-118.089	24.9914	-103.043	-52.2	31.4771	24.2771	47.4343	0.377143
122	-85.9314	-47.3914	-116.763	37.4314	-94.64	-38.82	38.0571	43.4029	63.82	-4.02857
122.5	-61.8457	-46.3943	-114.657	35.3257	-71.6429	-24.6829	37.5514	21.98	85.1886	9.08
123	-38.6743	-24.1171	-88.6257	59.76	-32.7657	3.47429	40.9914	32.2657	70.6171	40.3429
123.5	-18.8771	-24.1771	-58.56	36.98	26.6143	26.7371	56.0086	35.5286	63.7371	49.7057
124	0.14	4.20286	-4.48286	34.8229	27.74	45.5171	71.8057	63.3571	70.7114	67.5829
124.5	-7.21714	25.28	36.7143	55.24	68.1971	57.2657	44.5086	87.8314	64.5514	73.3914
125	-9.02571	31.9229	66.7314	56.78	82.0857	82.7743	52.2229	70.6857	45.3371	77.9171
125.5	10.3457	33.6314	91.8886	45.1657	91.8286	71.4086	56.3686	44.8371	33.78	102.563
126	47.8143	58.9657	113.134	49.0857	98.9914	74.1114	54.5743	38.4	21.9314	114.049
126.5	41.7743	77.4171	107.863	41.3343	87.24	69.2657	42.18	22.9343	15.0086	99.8943
127	53.0943	85.6371	89.2429	53.0029	78.7857	57.1943	10.2829	17.4629	-13.5057	78.72
127.5	51.6486	82.9257	66.2743	32.7029	97.3114	35.7829	-14.7943	-0.55429	-11.5371	70.9857
128	54.9314	106.714	52.2629	14.4771	49.0314	19.54	-27.5457	-31.1429	-10.2057	100.326
128.5	52.2743	129.389	66.7886	13.6943	49.4943	6.82571	-38.2171	-7.06286	-26.88	80.7314
129	55.6914	143.454	56.8943	36.8429	42.1571	27.3714	-41.1657	-2.34571	-21.5314	50.4857
129.5	39.8714	134.983	39.7257	21.7286	51.1943	13.4657	-40.44	-0.49143	-28.8743	46.8657
130	47.1886	125.911	63.9686	8.98286	87.7571	13.9171	-26.3829	4.70286	-37.4371	43.8714
130.5	33.1886	127.114	65.2057	-3.96857	94.6629	26.2429	-5.07714	13.0771	-21.4629	30.3314
131	56.1	138.323	61.76	26.7857	88.74	39.0543	10.3629	17.24	-33.3086	23.8429
131.5	46.3829	102.289	34.3429	38.8114	115.771	59.3257	12.6029	27.3171	-28.3343	-1.33429
132	52.3143	66.14	19.32	47.8343	110.271	51.0857	22.8543	12.7543	-15.1714	-12.6057
132.5	28.8	60.1171	18.6143	30.0571	110.129	51.9171	10.5771	0.594286	-15.9029	-3.06
133	32.4571	54.7029	11.6514	28.7257	90.1371	50.7971	11.8714	7.99143	-20.4114	-18.2229
133.5	21.5629	49.5429	5.53143	23.4657	65.2629	39.62	14.1257	21.5343	-18.52	-15.4886
134	18.7171	28.04	6.24286	42.2257	26.3486	37.5457	-0.35429	11.4	-15.8314	-17.24
134.5	7.03143	9.76857	-9.77714	25.1143	24.0971	20.26	-7.07429	5.2	-18.5486	-25.9257
135	6.29714	-4.76571	9.29143	20.9486	-10.8286	-10.6086	-14.04	-18.3	-17.5114	-31.72
135.5	-10.86	-18.12	-4.95143	-16.0857	-29.1914	-11.2086	-16.1514	-1.87714	-22.4771	-45.8114

## Sheet: NES-mNG-CK1_3
Time (h)	NES_PBS_1	NES_PBS_2	NES_PBS_3	NES_PBS_4	NES_PBS_5	NES_DOX_1	NES_DOX_2	NES_DOX_3	NES_DOX_4	NES_DOX_5
0	781.096	870.769	184.635	89.8654	122.462	-381.635	-372.173	94.2308	-277.327	-35.0192
0.5	830.667	835.815	115.578	30.6667	90.0593	-463.252	-502.978	37.1185	-286.667	-23.7778
1	773.786	735.988	-31.7024	-103.798	-81.631	-646.488	-685.226	-58.7381	-389.131	-72.5714
1.5	596.734	608.808	-229.365	-346.355	-341.02	-958.005	-933.463	-203.217	-570.823	-190.601
2	496.776	511.786	-385.829	-490.662	-490.19	-1105.5	-1126.34	-307.929	-669.586	-291.89
2.5	207.009	226.548	-750.009	-842.06	-916.931	-1569.73	-1552.67	-581.899	-937.811	-530.014
3	-181.942	-123.808	-1183.78	-1302.01	-1425.67	-2138.08	-2041.42	-914.665	-1262.25	-816.17
3.5	-672.065	-552.121	-1648.94	-1832.46	-1989.05	-2733.06	-2582.65	-1287.23	-1626.01	-1204.48
4	-1180.11	-983.151	-2121.05	-2348.32	-2573.66	-3329.56	-3104.38	-1665.8	-2028.79	-1624.63
4.5	-1647.34	-1397.11	-2546.54	-2829.2	-3059.31	-3850.77	-3588.69	-2006.77	-2373.17	-2013.69
5	-1976.2	-1741.86	-2904.44	-3180.6	-3446.63	-4227.04	-4004.56	-2292.27	-2654.42	-2344.56
5.5	-2214.08	-2032.79	-3159.2	-3441.59	-3758.94	-4532.17	-4244.84	-2489.49	-2848.76	-2554.77
6	-2357.97	-2231.98	-3291.14	-3591.48	-3915.18	-4684.24	-4361.35	-2599.14	-2935.63	-2696.17
6.5	-2428.84	-2351.33	-3335.66	-3620.14	-3964.75	-4675.9	-4407	-2632.54	-2967.58	-2764.46
7	-2443.06	-2398.45	-3300.71	-3538.04	-3901.07	-4590.58	-4332.92	-2608.22	-2934.93	-2755.98
7.5	-2357.15	-2360.13	-3185	-3388.07	-3757.89	-4441.92	-4197.76	-2532.63	-2829.55	-2677.94
8	-2227.29	-2243.38	-2985.79	-3138.69	-3509.38	-4238.31	-3971.05	-2402.67	-2671.5	-2559.83
8.5	-2063.06	-2105.09	-2714.75	-2837.87	-3225.78	-3929.6	-3617.26	-2229.29	-2437.28	-2378.11
9	-1836.94	-1865.44	-2401.3	-2459.53	-2810.55	-3524.88	-3218.7	-2003.86	-2178.6	-2153.82
9.5	-1561.11	-1556.73	-1983.7	-2016.78	-2332.38	-3025.2	-2709.81	-1709.28	-1852.71	-1871.63
10	-1268.75	-1245.81	-1531.17	-1505.26	-1762.49	-2439.49	-2140.94	-1406.43	-1463.33	-1568.11
10.5	-922.626	-865.657	-1037.29	-967.872	-1160.87	-1781.4	-1505.05	-1028.28	-1015.62	-1214.67
11	-585.348	-489.283	-497.393	-385.304	-564.625	-1069.9	-789.851	-593.086	-534.363	-810.795
11.5	-201.551	-99.7959	29.449	178.816	47.1837	-306.082	-16.5714	-137.816	-43.0816	-398.531
12	181.386	301.663	563.431	777.226	684.577	471.631	714.409	299.954	453.177	31.7314
12.5	529.291	655.014	1009.56	1289.59	1266.53	1148.05	1352.3	724.054	877.72	402.843
13	864.537	985.691	1449.03	1830.19	1823.94	1854.73	1951.83	1128.48	1333.23	812.06
13.5	1195.33	1337.83	1889.35	2283.41	2362.28	2527.31	2595.35	1530.21	1744.7	1219.02
14	1530.95	1601.52	2312.98	2727.81	2860.15	3118.14	3154.99	1918.16	2094.05	1606.43
14.5	1819.56	1871.02	2662.05	3102.81	3345.19	3691.59	3667.99	2250.74	2407.52	1967.16
15	2068.46	2104.91	2979.79	3411.62	3718.97	4220.54	4096.42	2524.37	2718.62	2292.67
15.5	2308.43	2276.46	3229.97	3671.78	4056.72	4671.31	4498.62	2779.93	2950.23	2578.41
16	2423.52	2403.21	3447.5	3883.79	4323.22	5011.92	4765.88	2939.34	3164.11	2807.7
16.5	2515.95	2504.15	3583.83	3975.36	4474.81	5247.32	4983.35	3059.64	3311.95	2944.61
17	2580.84	2497.02	3652.94	4054.05	4545.55	5399.73	5099.56	3142.97	3383.77	3027.53
17.5	2563.42	2504.26	3631.42	4037.66	4548.69	5462.33	5142.8	3130.74	3455.65	3077.6
18	2527.06	2410.27	3594.67	3995.97	4470.86	5446.8	5082.29	3075.4	3440.29	3075.62
18.5	2413.23	2302.9	3494.44	3905.69	4395.62	5376.89	4961.82	2993.61	3364.91	3055.25
19	2262.07	2184.5	3349.03	3722.52	4220.85	5208.88	4732.19	2871.73	3211.34	2961.63
19.5	2129.6	2032.21	3147.03	3525.35	3942	4970.43	4448.8	2703.83	3019.17	2852.17
20	1976.09	1850.23	2941.29	3253.76	3653.45	4659.32	4139.47	2505.13	2769.95	2696.72
20.5	1790.12	1667	2683.06	2944	3306.65	4279.76	3776.81	2264.47	2511.8	2516.73
21	1590.35	1435.47	2399.89	2598.23	2913.94	3898.01	3356.28	2003.08	2174.03	2295.86
21.5	1385.15	1224.46	2055.31	2238.72	2544.83	3465.99	2897.27	1721.49	1847.1	2063.51
22	1194.22	1003.81	1717.71	1885.71	2125.31	2963.31	2430.47	1400.78	1525.77	1785.74
22.5	955.326	764.52	1391.93	1512.85	1673.75	2431.57	1966.22	1113.57	1232.76	1503.27
23	713.929	537.331	1078.57	1123.45	1259.19	1922.39	1526.68	822.194	897.714	1194.25
23.5	460.96	295.071	751.043	781.863	848.08	1424.26	1069.97	509.866	576.957	904.549
24	215.506	72.1286	414.566	421.011	487.917	929.334	597.431	248.211	288.109	634.783
24.5	-2.66	-96.06	100.354	79.3571	96.5229	478.143	171.837	9.17429	27.2057	358.317
25	-219.694	-262.071	-125.489	-221.174	-272.44	50.2114	-201.549	-237.063	-206.797	65.0829
25.5	-410.137	-434.434	-384.377	-546.597	-590.591	-366.486	-604.797	-429.32	-428.88	-207.766
26	-577.123	-590.049	-610.046	-833.683	-863.631	-739.003	-956.329	-637.371	-641.151	-446.146
26.5	-716.46	-733.651	-830.38	-1099.91	-1108.17	-1075.97	-1238.7	-802.949	-805.829	-653.914
27	-832.629	-849.349	-1044.89	-1330.55	-1306.84	-1356.59	-1517.7	-939.28	-951.229	-846.854
27.5	-927.103	-943.611	-1201.08	-1483.15	-1524.11	-1598.57	-1730.47	-1068.91	-1095.74	-1012.2
28	-1016.15	-1013.09	-1305.63	-1625.17	-1694.61	-1804.43	-1933.16	-1190.44	-1213.94	-1149.16
28.5	-1092.33	-1086.28	-1420.4	-1751.16	-1808.73	-2003.89	-2100.87	-1252.16	-1325.19	-1277.83
29	-1146.95	-1144.49	-1479.73	-1833.79	-1928.65	-2138.97	-2176.04	-1309.36	-1414.13	-1352.17
29.5	-1170.67	-1158.02	-1540.79	-1888.26	-2022.1	-2236.93	-2233.98	-1343.3	-1473.86	-1427.98
30	-1193.61	-1168.99	-1562.53	-1907.82	-2110.51	-2275.07	-2296.28	-1370.75	-1495.47	-1496.77
30.5	-1204.82	-1161.42	-1557.18	-1904.57	-2186.81	-2310.18	-2301.26	-1381.69	-1530.16	-1515.31
31	-1205.65	-1131.36	-1548.76	-1919.23	-2204.07	-2315.79	-2305.58	-1394.96	-1550.48	-1544.86
31.5	-1178.21	-1111.97	-1548.15	-1888.17	-2156.73	-2330.27	-2263.65	-1389.87	-1535.91	-1537.23
32	-1155.87	-1080.14	-1537.19	-1867.31	-2156.75	-2278.66	-2197.09	-1393.34	-1507.91	-1504.56
32.5	-1128.21	-1011.2	-1522.54	-1815.49	-2132.5	-2220.85	-2143.93	-1374.78	-1471.06	-1470.53
33	-1092.82	-992.214	-1522.65	-1742.39	-2087.15	-2139.31	-2076.15	-1359.39	-1438.85	-1412.59
33.5	-1033.79	-921.266	-1509.73	-1649.75	-2003.73	-2091.52	-1970.98	-1326.88	-1416.04	-1346.69
34	-968.434	-847.469	-1472.12	-1574.54	-1909.31	-2013.49	-1876.93	-1278.08	-1359.92	-1278.31
34.5	-892.214	-806.649	-1414.15	-1471.57	-1827.05	-1919.65	-1743.94	-1220.46	-1294.38	-1209.05
35	-828.76	-772.554	-1352.16	-1356.92	-1750.92	-1795.12	-1607.08	-1136.38	-1229.12	-1118.89
35.5	-746.3	-705.389	-1291.51	-1254.41	-1634.75	-1669.16	-1476.04	-1042.42	-1162.52	-1022.87
36	-660.963	-656.131	-1202.38	-1147.53	-1515.88	-1541.19	-1322.97	-959.477	-1098.49	-897.831
36.5	-581.546	-553.463	-1096.58	-1048.6	-1387.43	-1385.44	-1172.87	-854.791	-998.106	-798.983
37	-511.029	-510.769	-996.557	-967.523	-1242.57	-1220.59	-1017.5	-744.889	-901.477	-677.194
37.5	-442.297	-433.2	-906.106	-846.04	-1118.82	-1067.19	-851.697	-634.971	-780.88	-559.537
38	-372.854	-351.12	-802.451	-756.729	-954.026	-933.8	-708.469	-508.394	-674.98	-441.291
38.5	-310.326	-259.094	-688.12	-667.194	-800.149	-784.86	-556.334	-399.38	-562.531	-344.8
39	-234.037	-173.509	-587.18	-527.831	-629.074	-651.577	-377.823	-290.614	-445.591	-250.546
39.5	-168.146	-82.3686	-479.851	-399.026	-462.663	-475.249	-209.794	-158.929	-329.029	-169.66
40	-88.0543	-29.2571	-336.889	-276.054	-285.694	-318.52	-30.5714	-65.6486	-223.057	-42.1714
40.5	-15.2029	43.4286	-214.723	-143.091	-137.117	-142.123	140.431	25.9943	-100.874	54.7714
41	79.1743	93.3429	-70.8657	-46.0143	25.0257	43.1	295.68	151.711	14.3	159.72
41.5	164.726	181.857	48.1686	86.7886	182.371	260.829	485.014	261.066	161.751	288.4
42	255.12	261.537	174.711	209.166	349.189	446.946	634.817	360.58	290.42	393.003
42.5	331.554	311.294	330.317	291.283	478.946	647.103	763.443	468.169	413.046	513.951
43	411.98	394.794	447.077	399.5	596.88	813.743	863.54	541.774	569.443	623.814
43.5	474.3	452.134	552.566	517.949	688.174	947.829	980.223	670.257	740.326	685.397
44	529.911	524.537	662.126	612.306	799.511	1061.54	1037.63	774.334	867.063	765.771
44.5	544.046	574.846	760.869	714.143	918.243	1153.96	1115.57	835.769	970.191	845.14
45	545.106	563.666	851.257	801.911	985.066	1253.93	1155.71	891.554	1069.93	889.38
45.5	554.391	558.283	894.271	845.677	1039.16	1311.85	1232.23	941	1157.13	947.003
46	559.329	563.217	926.731	896.64	1090.89	1355.6	1251.92	968.471	1237.09	969.009
46.5	545.391	527.331	953.06	927.191	1127.79	1382.45	1311.09	992.323	1264.36	959.674
47	518.426	525.591	950.3	934.434	1157.27	1410.55	1322.51	983.149	1235.1	973.64
47.5	504.526	488.68	959.486	939.5	1170.71	1407.48	1326.31	978.217	1245.87	964.754
48	509.411	476.546	957.409	928.274	1153.54	1374.8	1335.39	961.723	1247.01	908.606
48.5	517.489	466.569	939.494	898.723	1134.26	1317.58	1314.6	914.254	1209.27	862.391
49	487.486	458.654	942.863	894.22	1088.73	1298.88	1252.45	875.806	1176.59	812.56
49.5	464.006	419.949	908.866	873.169	1043.29	1238.15	1196.88	848.657	1124.95	762.706
50	439.131	371.169	900.54	828.063	1005.12	1151.13	1084.5	808.906	1080.04	714.583
50.5	436.449	328.077	880.134	774.483	963.614	1030.55	969.32	753.297	1025.2	658.974
51	417.131	288.234	820.206	720.174	866.8	939.903	881.126	674.971	922.631	592.686
51.5	381.954	243.137	750.409	659.137	784.417	874.246	758.68	610.171	809.214	545.271
52	342.951	194.206	661.351	590.089	707.52	782.231	653.589	552.26	722.58	484.92
52.5	320.097	151.731	570.551	517.82	633.52	643.231	534.234	499.689	618.051	413.049
53	279.717	124.629	510.631	464.251	555.523	522.68	429.183	403.109	496.44	347.397
53.5	239.371	84.6114	423.063	389.063	462.283	420.103	345.711	323.466	366.789	267.751
54	185.929	49.8857	329.277	307.823	346.18	339.78	274.526	229.98	253.5	204.231
54.5	107.457	25.0886	236.269	236.683	254.06	229.371	177.88	173.326	143.214	139.769
55	56.2857	-13.5057	155.523	162.154	152.986	120.52	54.7743	88.7057	44.4714	75.56
55.5	8.31429	-38.4429	79.2886	99.7971	58.1057	8.22857	-49.0743	28.6457	-43.4971	-7.21714
56	-42.3514	-92.7171	0.317143	26.8857	-7.90286	-83.3943	-132.823	-49.0829	-141.654	-74.5086
56.5	-76.7429	-104.826	-100.98	-54.8171	-100.64	-189.346	-210.774	-112.054	-211.38	-131.74
57	-116.294	-107.843	-188.289	-118.411	-184.054	-289.551	-300.76	-160.054	-263.637	-174.623
57.5	-148.157	-131.851	-259.506	-174.857	-244.411	-373.997	-388.114	-226.603	-297.554	-229.509
58	-160.391	-160.72	-309.8	-248.171	-291.32	-460.957	-465.857	-293.851	-318.717	-276.246
58.5	-180.951	-196.557	-396.314	-304.306	-340.429	-548.949	-501.003	-338.689	-341.694	-301.18
59	-205.786	-214.04	-449.214	-378.009	-407.106	-638.674	-561.737	-391.097	-400.049	-332.671
59.5	-231.3	-228.86	-504.129	-428.2	-482.751	-694.66	-625.891	-450.111	-422.049	-347.963
60	-248.131	-264.231	-557.503	-486.206	-547.843	-741.357	-678.049	-479.414	-457.063	-363.506
60.5	-276.571	-293.489	-588.446	-538.2	-589.637	-760.263	-721.446	-516.669	-490.931	-381
61	-296.96	-308.466	-636.649	-571.4	-638.057	-791.729	-744.654	-519.306	-524.951	-397.534
61.5	-320.643	-321.989	-677.251	-598.394	-693.246	-803.029	-749.977	-532.577	-538.614	-410.1
62	-332.083	-332.463	-695.283	-606.574	-710.509	-820.151	-746.58	-544.58	-537.04	-427.98
62.5	-348.84	-341.731	-707.511	-611.366	-724.949	-821.554	-740.98	-554.64	-539.397	-411.697
63	-349.717	-333.569	-705.963	-621.146	-742.906	-814.817	-706.666	-531.994	-549.443	-421.294
63.5	-361.823	-331.577	-697.834	-612.18	-743.151	-791.451	-698.634	-522.137	-527.437	-416.526
64	-347.057	-323.646	-692.249	-603.48	-752.357	-774.546	-669.266	-511.706	-497.82	-417.651
64.5	-337.969	-308.723	-673.849	-596.217	-737.586	-765.069	-648.737	-500.237	-483.577	-408.137
65	-319.783	-297.82	-661.009	-559.374	-722.206	-740.097	-622.929	-468.891	-467.86	-390.04
65.5	-296.617	-274.903	-624.731	-561.974	-698.143	-698.897	-604.257	-448.846	-466.626	-374.2
66	-278.977	-268.997	-575.903	-534.463	-672.066	-650.711	-573.96	-428.909	-417.394	-360.351
66.5	-257.143	-252.394	-551.466	-504.243	-616.534	-621.986	-554.48	-425.569	-384.463	-348.871
67	-241.611	-245.251	-511.7	-477.563	-561.171	-592.649	-505.514	-405.314	-354.163	-345.703
67.5	-216.983	-231.329	-479.334	-442.671	-481.137	-549.543	-454.106	-371.289	-330.817	-328.106
68	-204.7	-223.12	-430.14	-402.929	-433.811	-508.969	-411.049	-342.457	-288.134	-300.074
68.5	-189.883	-211.38	-389.617	-382.054	-385.466	-464.543	-373.52	-320.074	-266.434	-281.969
69	-175.186	-190.729	-357.369	-315.766	-343.451	-412.26	-336.566	-286.506	-224.257	-259.649
69.5	-159.32	-162.534	-328.443	-269.949	-298.411	-365.617	-295.226	-240.291	-216.786	-238.186
70	-130.311	-149.906	-269.411	-233.934	-245.649	-309.054	-238.674	-198.306	-193.991	-203.734
70.5	-104.743	-128.22	-219.077	-194.811	-216.454	-269.923	-198.246	-173.091	-178.206	-182.309
71	-93.8029	-111.503	-171.334	-160.471	-197.194	-242.803	-166.02	-159.36	-158.197	-158.2
71.5	-61.1371	-90.5086	-131.566	-129.74	-148.311	-196.723	-122.094	-122.743	-144.354	-135.737
72	-34.9286	-52.2943	-62.2743	-88.0314	-85.8086	-170.477	-88.3543	-105.189	-111.091	-121.28
72.5	-21.1343	-18.9	-7.69714	-83.9629	-44.1886	-138.271	-54.78	-89.8429	-105.354	-107.92
73	-0.93714	10.5971	30.7857	-48.2343	0.308571	-115.571	-30.7143	-69.2514	-84.32	-90.78
73.5	8.51429	56.4171	76.3943	-12.5971	35.3857	-93.3314	-12.2	-51.3114	-58.2514	-70.3714
74	15.06	86.1657	103.423	22.4914	86.5314	-68.6314	12.6543	-22.1543	-46.4657	-29.3971
74.5	45.6457	132.091	140.917	67.0829	128.783	-40.0314	14.2457	4.34857	-34.6457	8.58857
75	64.1857	151.42	168.409	97.8029	164.654	-16.1286	23.8257	3.45143	-29.38	18.3086
75.5	82.3314	163.074	192.994	111.06	178.297	27.4343	46.6629	20.1343	-28.8171	36.0343
76	106.777	169.92	224.28	142.923	195.646	38.02	63.1771	40.8	-15.1029	46.1571
76.5	136.349	180.7	259.74	163.774	239.246	73.6514	78.1543	36.2571	-12.2886	48.6171
77	172.309	182.274	279.337	181.974	263.097	92.3714	99.7029	50.7143	-7.79143	53.4686
77.5	193.04	198.451	309.443	208.843	247.014	118.934	95.4029	59.9114	-1.71429	48.0686
78	195.357	190.466	309.837	218.76	265.554	137.217	123.486	68.1	11.4857	41.1029
78.5	189.094	194.357	322.983	216.634	263.52	156.2	112.251	83.8171	19.6086	44.7086
79	205.183	203.98	309.383	247.551	284.3	146.011	122.52	91.3429	27.7686	52.6657
79.5	204.083	194.843	292.351	266.986	266.157	153.849	119.429	104.657	33.9171	65.8343
80	194.186	192.651	274.297	264.263	250.829	165.197	123.511	124.574	40.0286	74.5514
80.5	169.663	179.091	258.257	269.551	206.7	157.549	100.249	125.489	52.9543	78.3686
81	156.6	164.583	217.403	239.349	218.977	161.931	104.223	119.466	55.7429	80.9343
81.5	147.406	169.017	224.514	242.06	187.951	158.974	99.7543	104.966	52.2429	90.48
82	150.74	166.103	216.989	250.454	177.9	138.366	100.869	97.1914	57.8857	96.9314
82.5	137.183	149.64	199.577	237.711	175.914	142.909	88.9029	90.0657	54.4314	100.654
83	120.023	147.269	170.949	227.246	186.951	142.351	82.2971	89.5686	51.8286	98.5314
83.5	112.006	129.186	154.3	213	160.994	108.537	60.2286	68.52	57.2371	98.0086
84	109.443	119.634	140.78	186.331	137.294	99.06	54.2514	54.1429	46.9571	94.42
84.5	119.731	86.4714	122.22	194.997	133.84	69.6143	43.1429	59.2486	32.1943	82.7829
85	111.277	47.42	107.406	185.117	150.011	50.0114	6.14857	60.8543	24.0429	51.5829
85.5	87.1771	38.5114	78.82	151.637	130.529	46.8257	-1.34857	51.7686	17.5629	30.7286
86	59.4114	26.4771	63.2857	111.494	124.589	30.5714	-24.6714	45.3486	22.4886	10.4029
86.5	50.9914	21.3029	73.64	86.1229	111.137	15.2229	-40.3771	31.2257	11.7571	2.02571
87	45.7514	9.33143	67.5314	72.4457	113.02	15.1314	-34.0543	26.2857	-7.56286	-4.87429
87.5	12.7429	-20.82	39.7743	50.6057	143.74	4.47143	-55.54	26.3914	-20.0029	-22.7086
88	-12.5686	-13.4571	20.5314	9.10857	116.006	8.15714	-57.4543	3.92857	-16.1943	-33.8086
88.5	-36.48	-23.7886	-6.07143	-30.92	91.3971	9.74571	-38.6457	1.39714	-17.6314	-34.3114
89	-40.34	-58.8029	-36.2314	-55.2057	64.3971	2.99714	-56.1571	-2.59143	-30.8371	-37.4257
89.5	-36.5771	-91.3943	-34.92	-73.7829	-3.00286	5.48571	-53.2771	-10.5971	-49.3029	-44.5629
90	-40.2086	-112.037	-55.64	-90.0629	-21.4857	-0.72286	-35.4086	-37.0543	-62.1971	-54.6714
90.5	-56.26	-125.554	-89.78	-111.863	-53.2286	-0.92857	-37.7971	-35.3286	-57.82	-59.1486
91	-43.1771	-138.52	-82.1514	-110.134	-85.1171	7.76571	-21.74	-36.6686	-59.5286	-57.5057
91.5	-67.9714	-147.569	-80.5914	-113.074	-88.4429	3.55143	-30.5171	-38.9	-63.4514	-57.4714
92	-68.7143	-145.651	-100.889	-129.354	-105.454	-14.4257	-44.4771	-41.9514	-78.3514	-48.3029
92.5	-61.52	-138.851	-110.897	-130.443	-114.691	-13.0457	-31.8486	-56.9971	-84.6829	-44.7314
93	-85.7371	-130.091	-132.194	-131.269	-114.26	-7.22571	-33.3029	-52.8371	-76.9314	-35.9743
93.5	-98.2429	-135.186	-163.946	-143.814	-133.529	-21.3314	-48.7086	-47.82	-63.1543	-34.2514
94	-93.2429	-129.869	-167.129	-149.429	-146.26	-37.2486	-56.1686	-59.3886	-52.2714	-44.2743
94.5	-92.6486	-115.597	-168.474	-172.666	-158.051	-45.5114	-59.5943	-70.5543	-50.6114	-45.98
95	-74.6	-105.214	-162.237	-167.989	-173.054	-52.6686	-63.8171	-61.1543	-43.6229	-33.2543
95.5	-63.1686	-81.92	-164.509	-163.763	-175.831	-38.3429	-50.16	-74.7857	-26.9286	-38.8257
96	-71.7429	-78.6629	-129.486	-154.491	-172.909	-41.5771	-50.8457	-59.5029	-17.0829	-38.6571
96.5	-46.3029	-60.6143	-95.7543	-112.937	-163.386	-74.4029	-40.3229	-63.7943	-21.84	-35.9543
97	-30.5114	-40.4714	-78.6486	-109.491	-141.029	-78.1343	-21.5343	-52.7	-19.0343	-19.9857
97.5	-36.5714	-21.8143	-55.5286	-97.1771	-134.557	-82.9086	-8.30857	-45.5857	-19.7743	-14.5886
98	-34.7943	-6.74286	-42.6	-64.9343	-133.377	-84.2171	8.06286	-28.8486	-20.58	1.04571
98.5	-25.9657	14.9286	-31.6571	-60.6714	-139.663	-77.5743	29.7714	-25.3029	-8.08571	-2.77714
99	-35.5057	9.68571	-14.1257	-51.5971	-140.869	-79.4429	20.0086	-13.4114	-17.3429	7.69429
99.5	-26.8686	30.3543	-5	-25.6571	-120.383	-92.2457	36.9143	-16.38	-17.6429	11.3914
100	-24.9314	45.9514	1.09429	-38.4857	-88.1914	-68.2057	54.1	-5.22571	-11.0114	8.42571
100.5	-34.1543	63.1	18.1086	-16.1714	-82.6743	-51.72	37.2743	-0.10571	-23.7343	1.71714
101	-15.2657	77.7286	30.4457	3.76857	-71.7314	-33.6743	20.8943	11.9029	-29.62	0.68
101.5	-16.1743	103.609	43.1343	7.98571	-51.7829	-14.6771	12.4429	1.36286	-26.34	-5.2
102	-25.3086	105.451	55.4486	15.6371	-13.3686	-11.6571	11.8057	8.2	-43.5114	-10.8171
102.5	-11.4343	105.817	61.4029	44.8229	1.93429	3.34286	27.5114	6.84	-36.5086	-19.2143
103	-7.62286	118.343	72.6314	48.2886	17.4829	25.0829	30.0714	15.34	-23.66	-21.8714
103.5	-0.75143	105.891	64.6371	48.5314	30.1829	36.4	14.6743	14.1971	-23.26	-26.2829
104	15.8714	104.097	92.3486	48.5857	44.4971	52.6314	38.7514	-0.04857	-13.5057	-32.6543
104.5	12.8114	107.506	111.649	54.5057	94.2657	67.8914	61.5457	5.57429	3.23429	-17.12
105	12.7286	106.297	99.2743	54.9914	126.429	70.4514	76.1	14.0057	-0.28571	-22.6514
105.5	14.4457	102.986	93.7686	68.3543	143.943	91.2229	69.7886	8.95143	7.54857	-15.5429
106	5.44571	104.88	116.137	72.9143	176.257	94.8743	74.3029	-0.86286	13.1343	-21.0771
106.5	-0.17429	89.8514	126.24	69.3086	163.243	116.3	64.2229	9.66857	15.6171	-14.0486
107	3.34857	103.677	137.931	89.1343	159.006	129.966	76.3429	5.78857	28.58	-8.28
107.5	4.98571	96.3143	142.06	111.729	172.689	129.174	62.2371	35.2	44.2657	-3.92857
108	15.1143	74.7	156.803	137.597	149.263	130.663	56.4629	18.9057	28.6143	-25.6314
108.5	30.2143	57.9286	172.54	142.649	146.303	128.197	43.52	37.7171	41.3743	-18.0686
109	37.9914	50.4229	158.737	142.3	136.609	116.863	53.2971	41.18	59.1914	-19.7029
109.5	44.7486	50.1286	154.36	139.597	122.986	126.177	53.06	47.9057	76.1514	-6.17143
110	55.7771	36.72	153.371	147.543	129.611	111.58	58.96	43.9943	73.9371	-3.90286
110.5	40.2114	13.9857	143.471	139.574	134.897	104.971	48.9771	46.8486	75.9829	-14.4857
111	41.3286	13.9371	102.114	139.5	120.297	88.8143	52.4686	36.6029	72.5114	-11.7686
111.5	36.9343	8.22	75.8229	101.44	134.334	63.9314	64.9971	63.0714	84.9029	3.56
112	26.36	-25.9371	50.8343	110.923	125.806	51.0571	59.2771	46.68	75.2686	14.6086
112.5	35.8657	-24.8714	78.3714	111.394	107.82	26.0657	57.2914	44.4629	67.1771	19.3171
113	26.1171	-47.6857	68.9571	92.9914	98.1743	-11.22	51.7029	61.6543	41.5886	24.9771
113.5	21.7571	-44.7971	41.6314	62.8486	90.84	-33.6829	45.3114	64.72	34.5143	26.86
114	24.1371	-30.6143	28.72	55.5743	75.4143	-52.8743	45.4314	56.8429	28.7714	30.34
114.5	11.2257	-52.5371	15.2771	30.2829	80.0086	-46.4829	52.4343	54.78	17.5629	37.0514
115	-3.48571	-50.34	-22.7886	30.8629	54.1914	-46.0343	29.96	33.9343	21.7286	47.2257
115.5	-10.7971	-26.2943	-35.8571	-3.96	15.6114	-57.9571	32.2857	39.1143	15.0143	47.0714
116	-37.12	-25.9429	-81.4029	-42.5057	14.2429	-40.54	20.6286	45.1	17.18	36.1429
116.5	-27.3971	-5.21714	-100.477	-51.0886	-20.4714	-40.38	4.96	31.9486	21.72	33.5971
117	-25.7343	-15.78	-124.337	-65.8229	-20.38	-32.94	-9.71714	22.0971	19.2629	23.8
117.5	-38.2657	-24.3286	-146.834	-79.9886	-31.4829	-43.4629	-25.8743	20.5514	21.9657	26.5371
118	-35.32	-23.8914	-150.663	-87.0971	-81.2029	-39.6743	-44.3514	23.9543	19.8743	22.4657
118.5	-31.6371	-34.9114	-141.78	-99.72	-106.611	-40.6143	-41.8686	19.5143	15.3314	2.96
119	-34.9029	-33.2343	-155.069	-93.6429	-83.6657	-36.3971	-30.4657	17.2171	18.6057	-2.84571
119.5	-30.6286	-50.0171	-128.16	-71.0429	-90.4429	-43.28	-29.2829	5.63714	9.72286	-4.04286
120	-26.2514	-68.7171	-131.749	-71.4114	-83.8514	-36.14	-12.5343	17.1057	7.26857	-8.99714
120.5	-42.1943	-72.8457	-122.734	-53.2057	-89.78	-22.3314	2.82571	16.04	10.4029	-4.57143
121	-48.1371	-94.4457	-127.117	-38.8143	-87.6086	-7.98	22.6057	15.7371	1.13714	-3.07429
121.5	-53.6143	-86.8829	-115.997	-31.0057	-63.1971	-23.3029	32.24	14.7	10.2114	-4.18286
122	-44.8314	-79.8086	-89.2057	-13.2257	-48.8857	-26.7857	33.6343	5.43714	-4.84857	5.29429
122.5	-31.8086	-81.4057	-70.4857	-2.28571	-44.8457	-1.86	27.5657	5.03714	-5.95714	-3.93714
123	-46.24	-80.4857	-54.1943	5.90286	-38.6486	8.26857	41.94	8.07429	0.231429	-0.65429
123.5	-62.0816	-72.9796	-29.9796	9.20408	-7.08163	15.4286	29.9796	-7.10204	-4.53061	-8.73469
124	-53.9375	-69.9524	-25.8036	9.00595	-20.5327	14.5893	26.4732	-13.9851	-9.21131	-11.8988
124.5	-37.2067	-50.0699	11.076	12.1185	-19.383	25.1915	16.7234	-14.3404	-6.32523	-5.61094
125	-35.2919	-49.323	35.1832	17.4193	2.45963	30.0404	9.02174	-12.3199	-9.17391	-2.69255
125.5	-44.2698	-49.473	40.2127	23.1619	-11.4127	44.5651	21.927	0.596825	2.29524	-20.5746
126	-37.6201	-36.9221	52.3474	3.5	-13.211	43.237	19.698	-8.41234	-1.26299	-18.5909
126.5	-17.8372	-38.3787	33.5415	9.48505	5.33887	43.0133	-8.19934	-16.6645	-0.34551	-17.289
127	-9.54762	-30.7143	24.8333	10.4524	-19.7381	36.7381	-18.3333	-18.2619	2.26191	-16.0952
127.5	2.26829	-20.5575	30.2857	23.4286	-16.4599	26.9024	-21.108	-19.3136	0.337979	-10.1254
128	9.92143	-5.98929	35.3107	22.6714	-28.2036	14.625	-27.4321	-22.775	-8.26071	-18.125
128.5	13.6484	0.260073	25.8425	17.2784	-39.044	4.04762	-40.5495	-31.663	-27.4725	-24.0183
129	16.0188	8.83835	34.6617	27.9173	-25.5827	2.09023	-70.4774	-41.8383	-33.6917	-14.9173
129.5	22.1969	-14.61	27.7336	34.9575	-30.9614	-23.0193	-97.2819	-32.1351	-42.5946	-7.51351
130	23.0794	8.34127	40.0556	18.4286	-59.1429	-27.1667	-97.496	-28.9802	-58.0913	-8.27381
130.5	27.0571	7.31429	37.4	8.31429	-53.8	-35.4571	-102.886	-36.2571	-49.1429	-7.4
131	17	26.3865	53.1597	-4.71008	-36.5714	-58.3025	-132.731	-39.6723	-58.3109	-15.5126
131.5	4.31602	33.7965	49.7316	-17.1515	-15.2987	-69.9351	-147.186	-50.5714	-62.6537	-18.039
132	-0.95089	44.6652	33.0893	-40.0089	7.37946	-77.3259	-158.085	-55.9598	-51.3884	-17.9509
132.5	7.14286	45.7604	-3.38249	-75.106	-4.3871	-102.659	-160.963	-63.1198	-53.0783	-29.1244
133	-13.1048	61.6524	-12.5905	-76.6952	11.5191	-107.367	-157.552	-82.5476	-48.881	-40.5095
133.5	-16.6158	57.2414	-34.2365	-106.404	0.807882	-128.054	-162.966	-90.2759	-58.6404	-34.8621
134	-5.53571	51.2857	-39.5	-127.714	0.142857	-158.214	-174.679	-99.6429	-85.6071	-32.5714
134.5	-2.2037	34.8889	-57.0185	-148.889	-4.62963	-154	-166.463	-101.5	-83.7037	-33.2407
135	3.79231	14.0846	-85.7308	-167.162	-14.7538	-163.808	-166.146	-102.369	-82.7462	-37.5308
135.5	17.54	-2	-88.56	-166.03	-59.61	-165.99	-157.98	-112.4	-95.35	-39.2
