# Supplementary material for: Nuclear CK1δ as a critical determinant of PER:CRY complex dynamics and circadian period
Source: eLife. 2026 Jun 15;15:RP110786. doi: 10.7554/eLife.110786 (PMC13268647; doi:10.7554/eLife.110786)
Supplement: Figure 7—source data 7. [file elife-110786-fig7-data7.xlsx]

## Sheet: NLS_1_NonLinFit
Damped sine wave
Best-fit values
Amplitude	6240	11135
K	0.02947	0.0194
Wavelength	24	21.4
PhaseShift	-2.412	-2.177
Frequency	0.04166	0.04674
HalfLife	33.93	51.54
95% CI (profile likelihood)
Amplitude	6039 to 6444	10652 to 11624
K	0,02815 to 0,03085	0,01821 to 0,02064
Wavelength	23,79 to 24,21	21,25 to 21,54
PhaseShift	-2,463 to -2,361	-2,242 to -2,113
Frequency	0,04130 to 0,04203	0,04642 to 0,04706
HalfLife	32,41 to 35,53	48,44 to 54,91
Goodness of Fit
Degrees of Freedom	1084	1084
R squared	0.8556	0.7615
Sum of Squares	498671887	4275886313
Sy.x	678.3	1986
Constraints
K	K > 0	K > 0
Wavelength	Wavelength > 20	Wavelength > 20
Number of points
# of X values	1360	1360
# Y values analyzed	1088	1088

## Sheet: NLS_2_NonLinFit
Damped sine wave
Best-fit values
Amplitude	661.1	1196
K	0.01166	0.01366
Wavelength	26.83	21.51
PhaseShift	-1.129	-1.837
Frequency	0.03727	0.04649
HalfLife	85.76	73.22
95% CI (profile likelihood)
Amplitude	593,4 to 730,7	1098 to 1296
K	0,009829 to 0,01357	0,01198 to 0,01542
Wavelength	26,38 to 27,28	21,27 to 21,75
PhaseShift	-1,288 to -0,9740	-1,968 to -1,709
Frequency	0,03666 to 0,03791	0,04597 to 0,04702
HalfLife	73,70 to 101,7	64,85 to 83,49
Goodness of Fit
Degrees of Freedom	812	812
R squared	0.4519	0.5511
Sum of Squares	63540827	129506009
Sy.x	279.7	399.4
Constraints
K	K > 0	K > 0
Wavelength	Wavelength > 18	Wavelength > 18
Number of points
# of X values	1360	1360
# Y values analyzed	816	816

## Sheet: NLS_3_NonLinFit
Standard sine wave*
Best-fit values
Amplitude	641.6	783.1
Wavelength	26.95	22.26
PhaseShift	-2.801	-2.722
Frequency	0.03711	0.04492
95% CI (profile likelihood)
Amplitude	586,4 to 696,8	701,9 to 864,4
Wavelength	26,63 to 27,28	21,95 to 22,59
PhaseShift	-2,960 to -2,638	-2,914 to -2,528
Frequency	0,03665 to 0,03755	0,04427 to 0,04556
Goodness of Fit
Degrees of Freedom	269	269
R squared	0.6604	0.5712
Sum of Squares	28544783	62105116
Sy.x	325.8	480.5
Constraints
Amplitude	Amplitude > 0	Amplitude > 0
Wavelength	Wavelength > 0	Wavelength > 0
Number of points
# of X values	272	272
# Y values analyzed	272	272
*Non-linear curve fitting using a standard sine wave was chosen since using a damped sine wave resulted in unstable values

## Sheet: NES_1_NonLinFit
Damped sine wave
Best-fit values
Amplitude	-1227	-1422
K	0.02729	0.02617
Wavelength	26.24	26.05
PhaseShift	-0.3155	-0.2361
Frequency	0.03811	0.03839
HalfLife	36.65	38.22
95% CI (profile likelihood)
Amplitude	-1303 to -1152	-1507 to -1339
K	0,02522 to 0,02949	0,02426 to 0,02819
Wavelength	25,95 to 26,54	25,77 to 26,33
PhaseShift	-0,3752 to -0,2548	-0,2960 to -0,1751
Frequency	0,03768 to 0,03854	0,03798 to 0,03880
HalfLife	33,91 to 39,65	35,47 to 41,22
Goodness of Fit
Degrees of Freedom	268	268
R squared	0.8824	0.8907
Sum of Squares	3397267	4458446
Sy.x	112.6	129
Constraints
K	K > 0	K > 0
Wavelength	Wavelength > 20	Wavelength > 20
Number of points
# of X values	272	272
# Y values analyzed	272	272

## Sheet: NES_2_NonLinFit
Damped sine wave
Best-fit values
Amplitude	-5807	-6046
K	0.04518	0.03478
Wavelength	23.82	25.7
PhaseShift	-0.2163	-0.00106
Frequency	0.04198	0.03892
HalfLife	22.14	28.75
95% CI (profile likelihood)
Amplitude	-6128 to -5494	-6327 to -5773
K	0,04220 to 0,04829	0,03277 to 0,03689
Wavelength	23,38 to 24,30	25,35 to 26,05
PhaseShift	-0,2743 to -0,1536	-0,05577 to 0,05563
Frequency	0,04115 to 0,04278	0,03839 to 0,03945
HalfLife	20,71 to 23,70	27,11 to 30,52
Goodness of Fit
Degrees of Freedom	1356	1356
R squared	0.7066	0.7743
Sum of Squares	702652143	750115204
Sy.x	719.8	743.8
Constraints
K	K > 0	K > 0
Wavelength	Wavelength > 20	Wavelength > 20
Number of points
# of X values	1360	1360
# Y values analyzed	1360	1360

## Sheet: NES_3_NonLinFit
Damped sine wave
Best-fit values
Amplitude	-3753	-4365
K	0.0312	0.02939
Wavelength	26.26	26.69
PhaseShift	0.07761	0.1729
Frequency	0.03808	0.03747
HalfLife	32.05	34.02
95% CI (profile likelihood)
Amplitude	-3993 to -3529	-4564 to -4172
K	0,02866 to 0,03399	0,02769 to 0,03119
Wavelength	25,76 to 26,75	26,37 to 27,02
PhaseShift	-0,003629 to 0,1605	0,1148 to 0,2329
Frequency	0,03738 to 0,03882	0,03701 to 0,03792
HalfLife	29,42 to 34,89	32,07 to 36,11
Goodness of Fit
Degrees of Freedom	1356	1356
R squared	0.7047	0.7599
Sum of Squares	474153836	525626041
Sy.x	591.3	622.6
Constraints
K	K > 0	K > 0
Wavelength	Wavelength > 20	Wavelength > 20
Number of points
# of X values	1360	1360
# Y values analyzed	1360	1360

## Sheet: PeriodDiff
NLS-PBS	NLS-DOX	NLS-Δ period*		NES-PBS	NES-DOX	NES-Δ period*
24	21.4	-2.6		26.24	26.05	-0.19
26.83	21.51	-5.32		23.82	25.7	1.88
26.95	22.26	-4.69		26.26	26.69	0.43
Period data determined by nonlinear fitting of a damped sine wave using GraphPad Prism 10
*Δ period = DOX - PBS
Values in bold are period data shown in the main Figure (Fig 7E)

## Sheet: ANOVA_PeriodDiff
Ordinary One-way ANOVA
Šídák's multiple comparisons test	Mean diff,	95,00% CI of diff,	Below threshold?	Summary	Adjusted P Value
NLS vs. NES	-4.91	-8,015 to -1,805	Yes	**	0.0062
Test details	Mean 1	Mean 2	Mean diff,	SE of diff,	n1	n2	t	DF
NLS vs. NES	-4.203	0.7067	-4.91	0.9486	3	3	5.176	6
